# Supplementary material for: Multiomics Picture of Obesity in Young Adults
Source: MDPI journal article supplement (doi:10.3390/biology13040272), 2024-04-18

Loadings on comp 1  
Block 'metab'

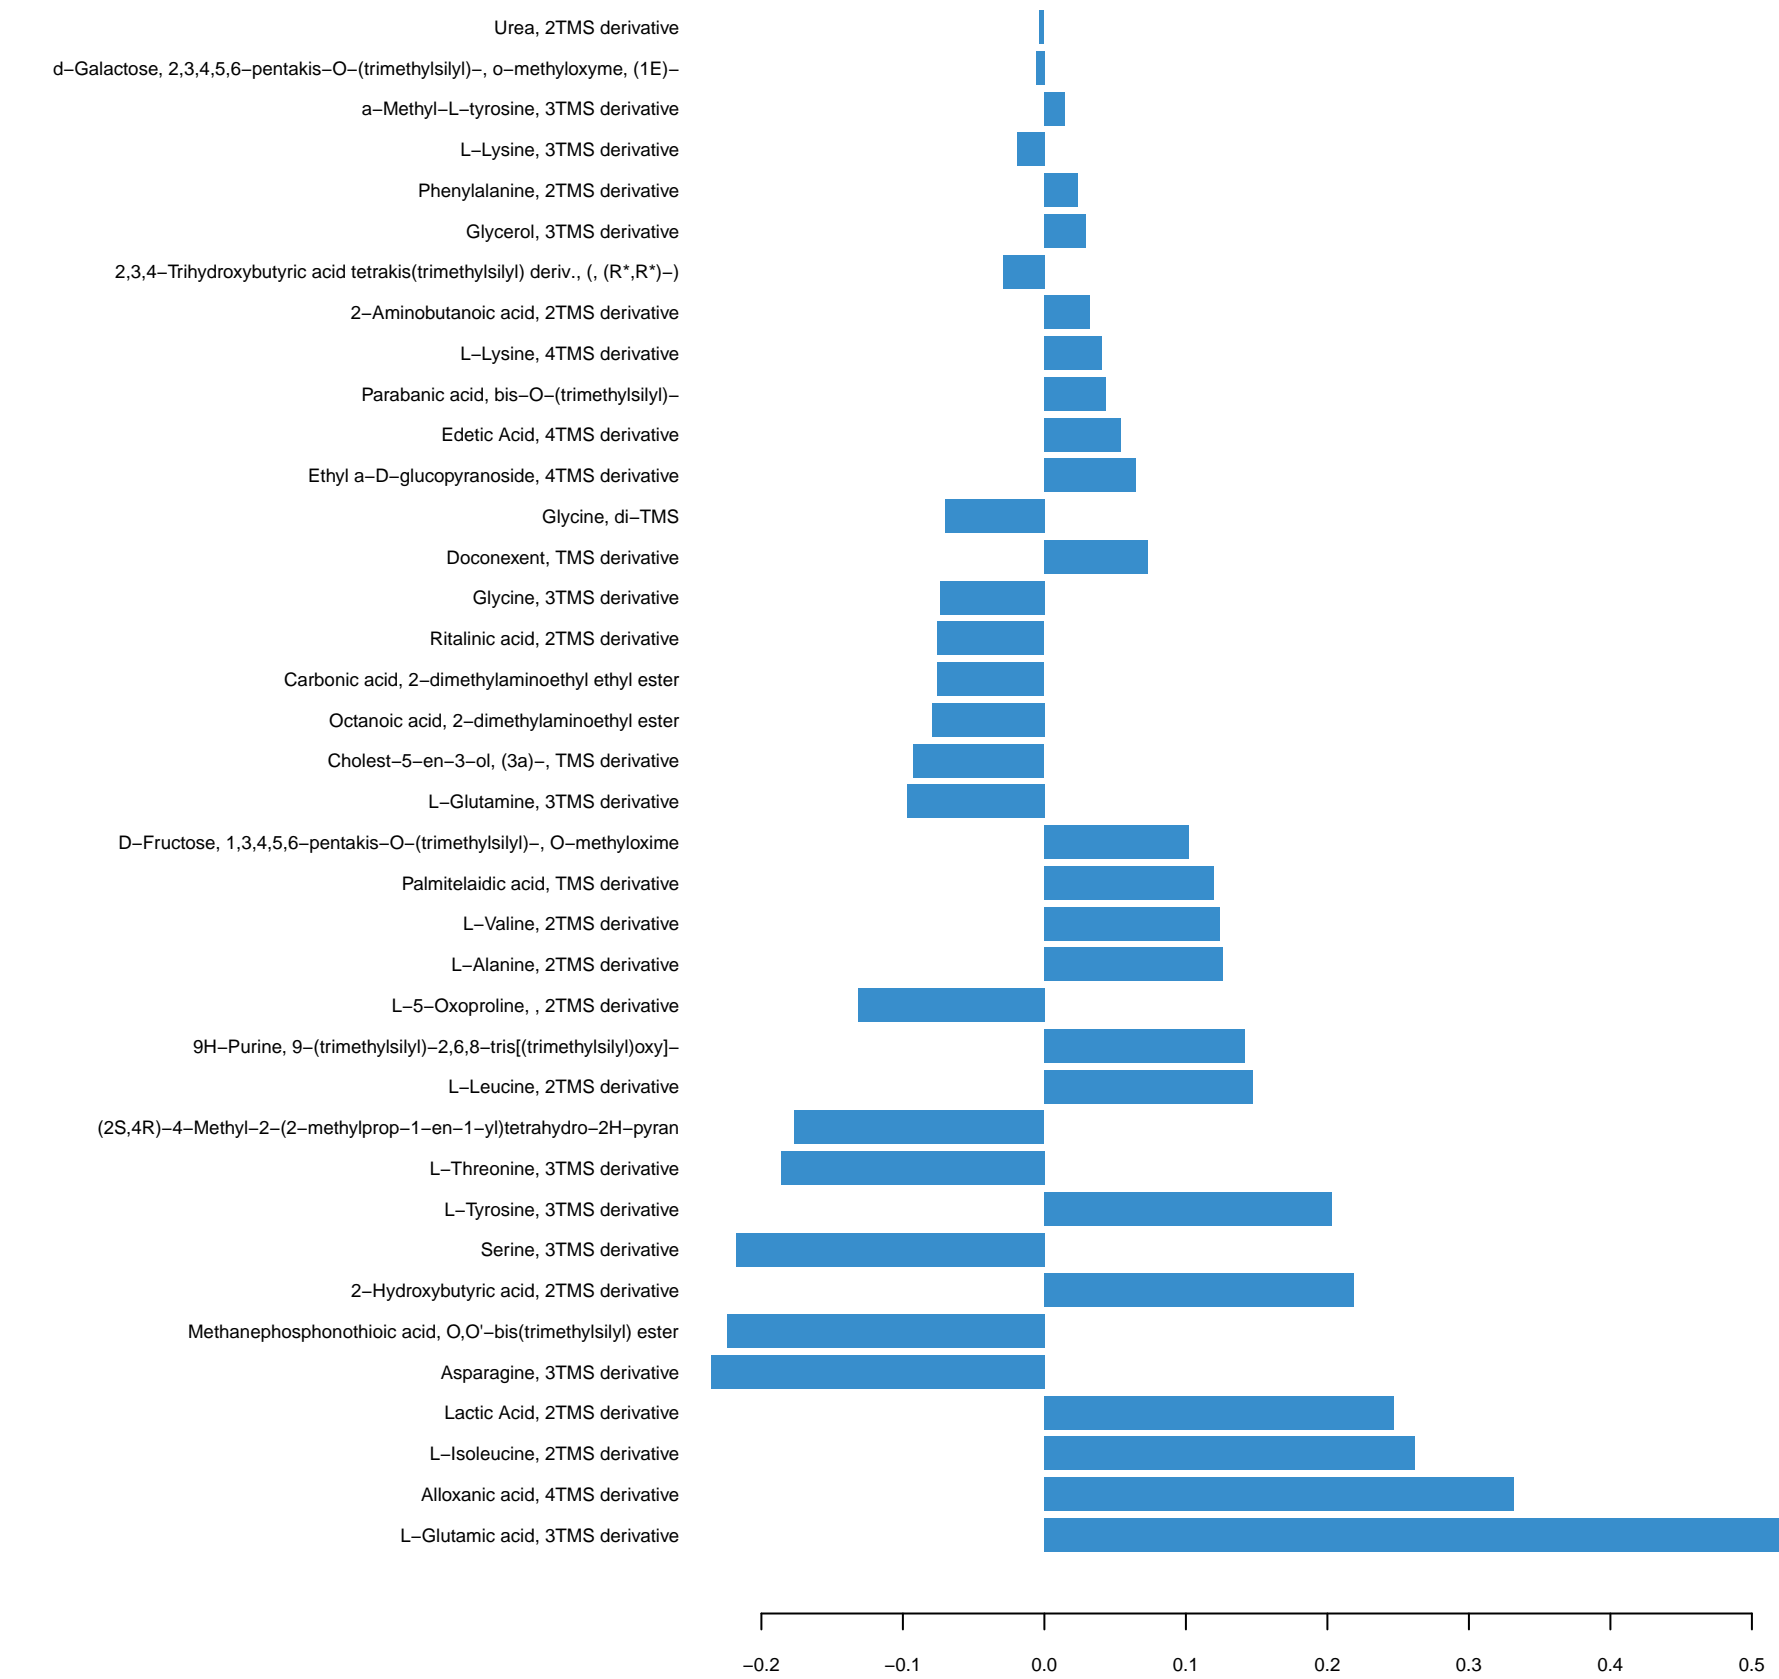

Loadings on comp 1  
Block 'prot'

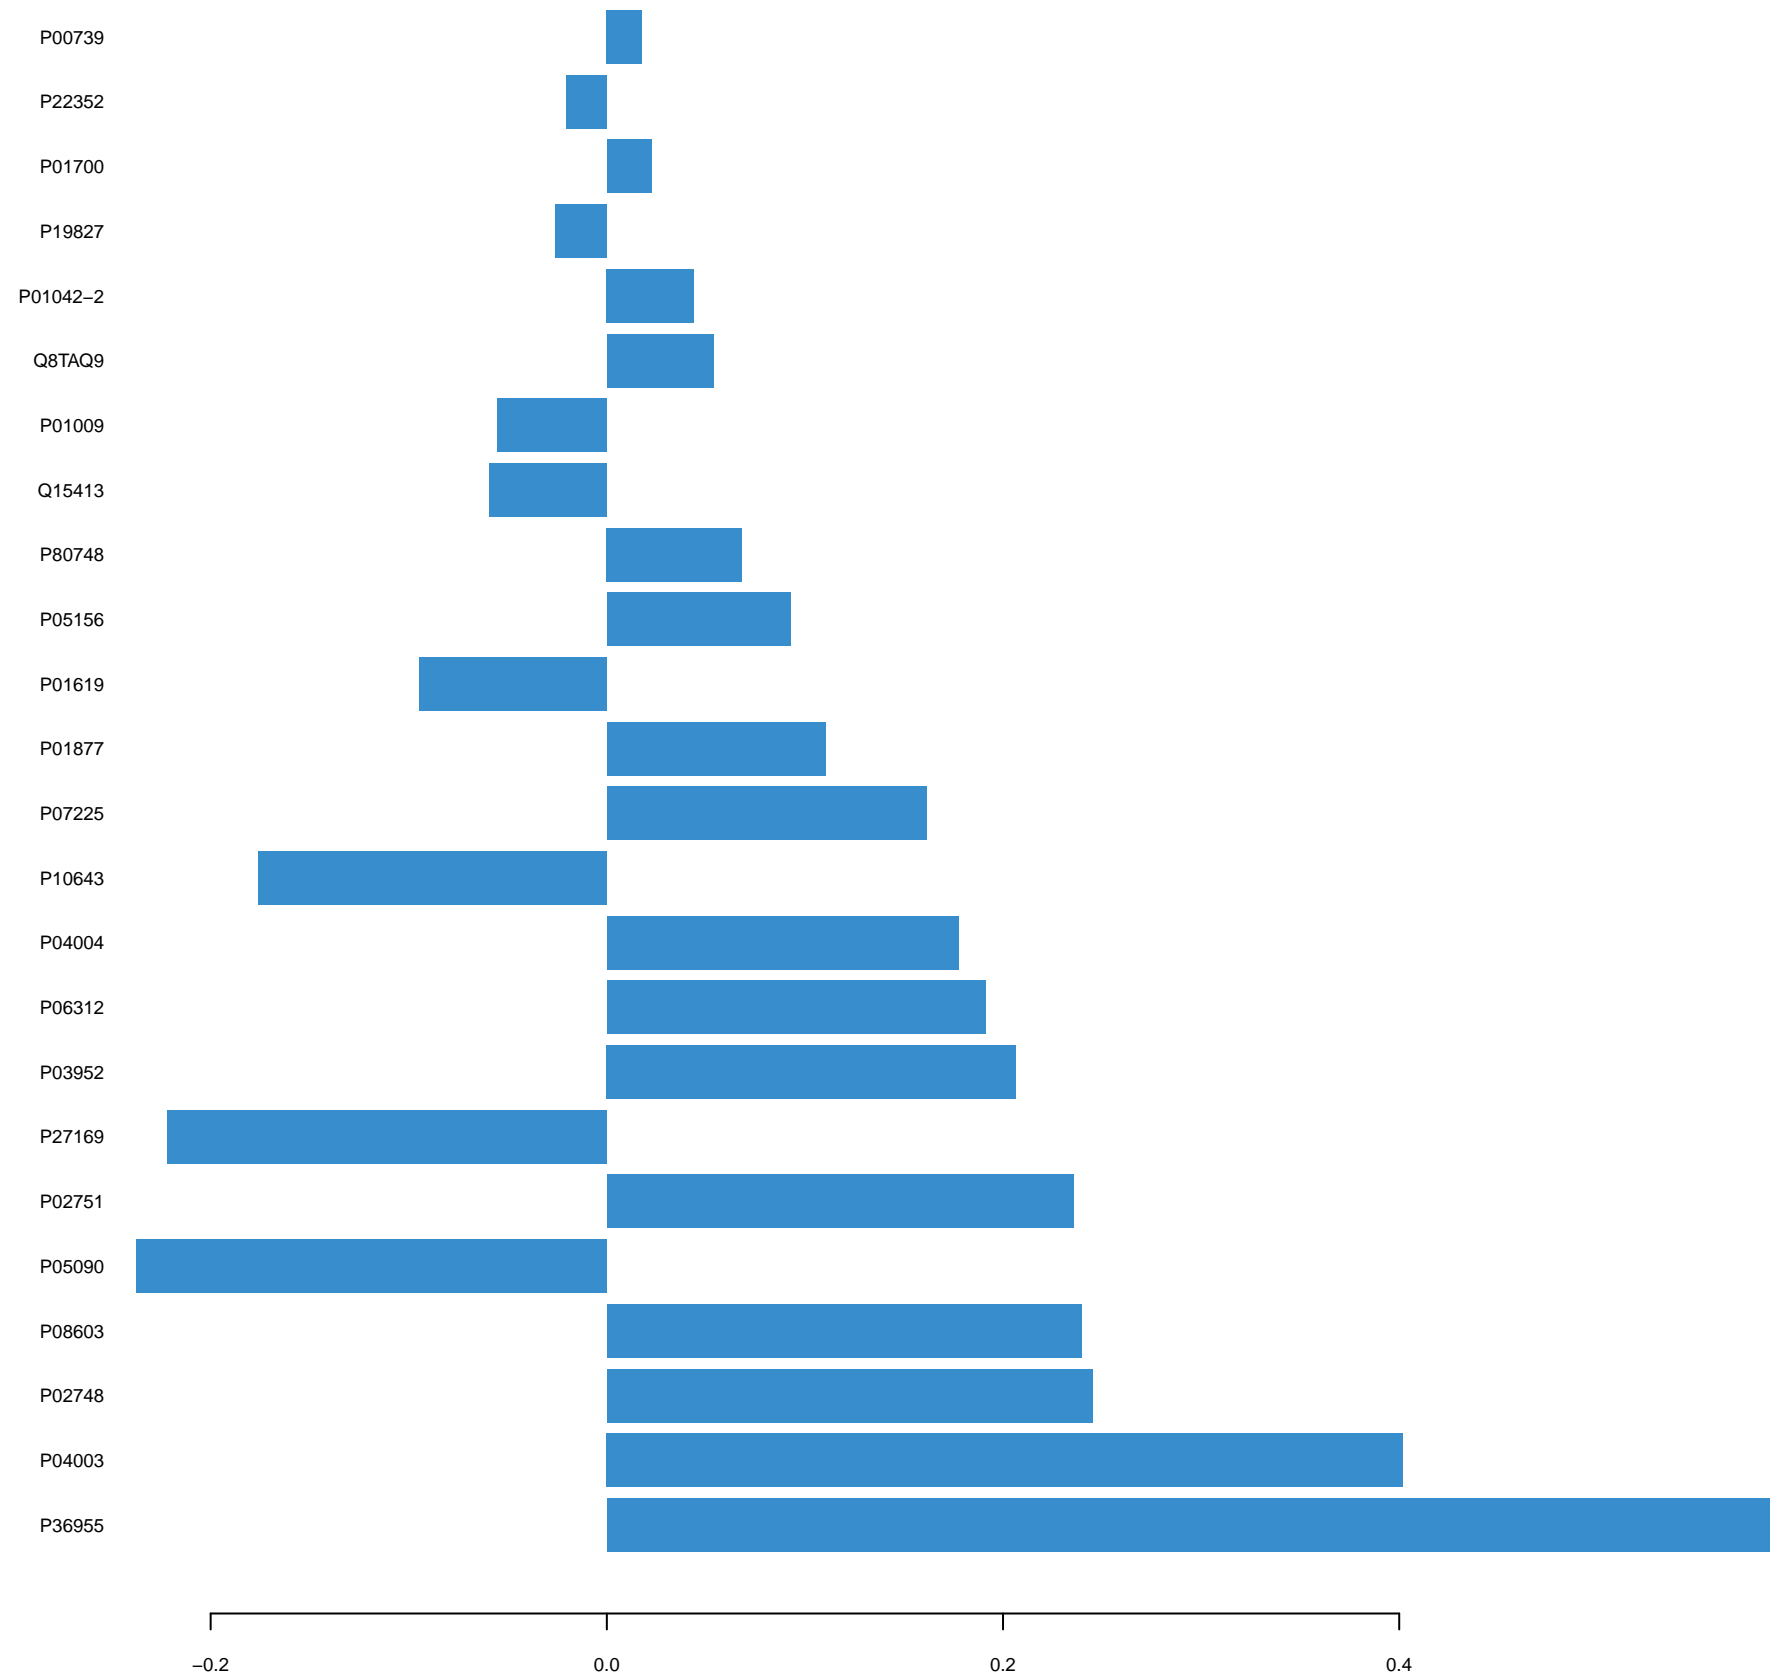

Loadings on comp 1  
Block 'geno'

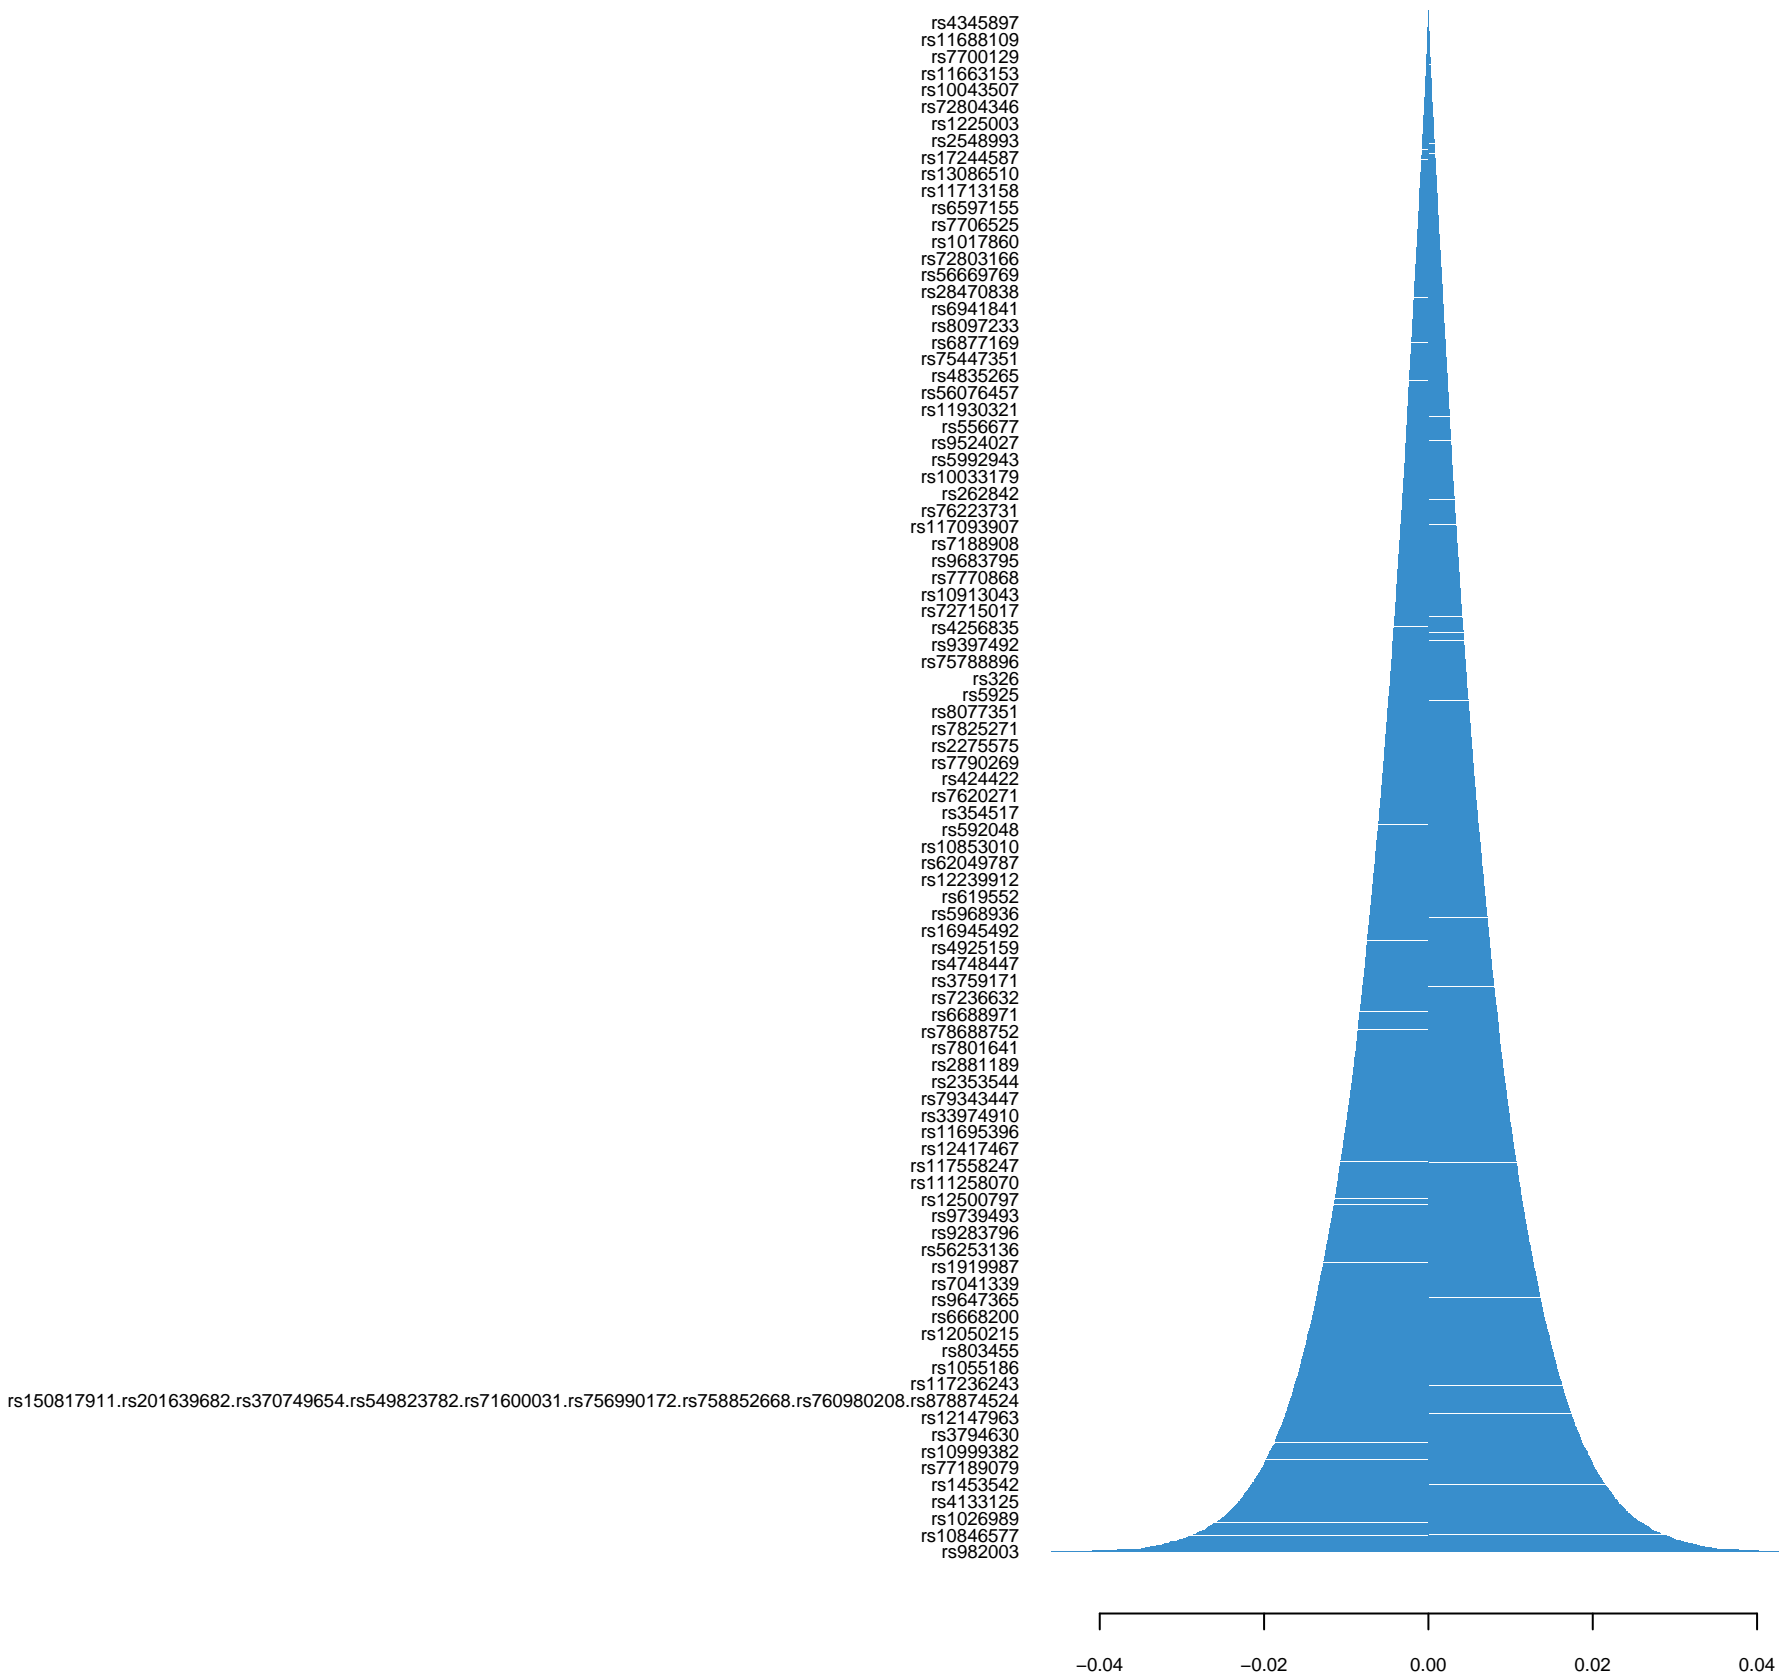

Loadings on comp 1  
Block 'Y'

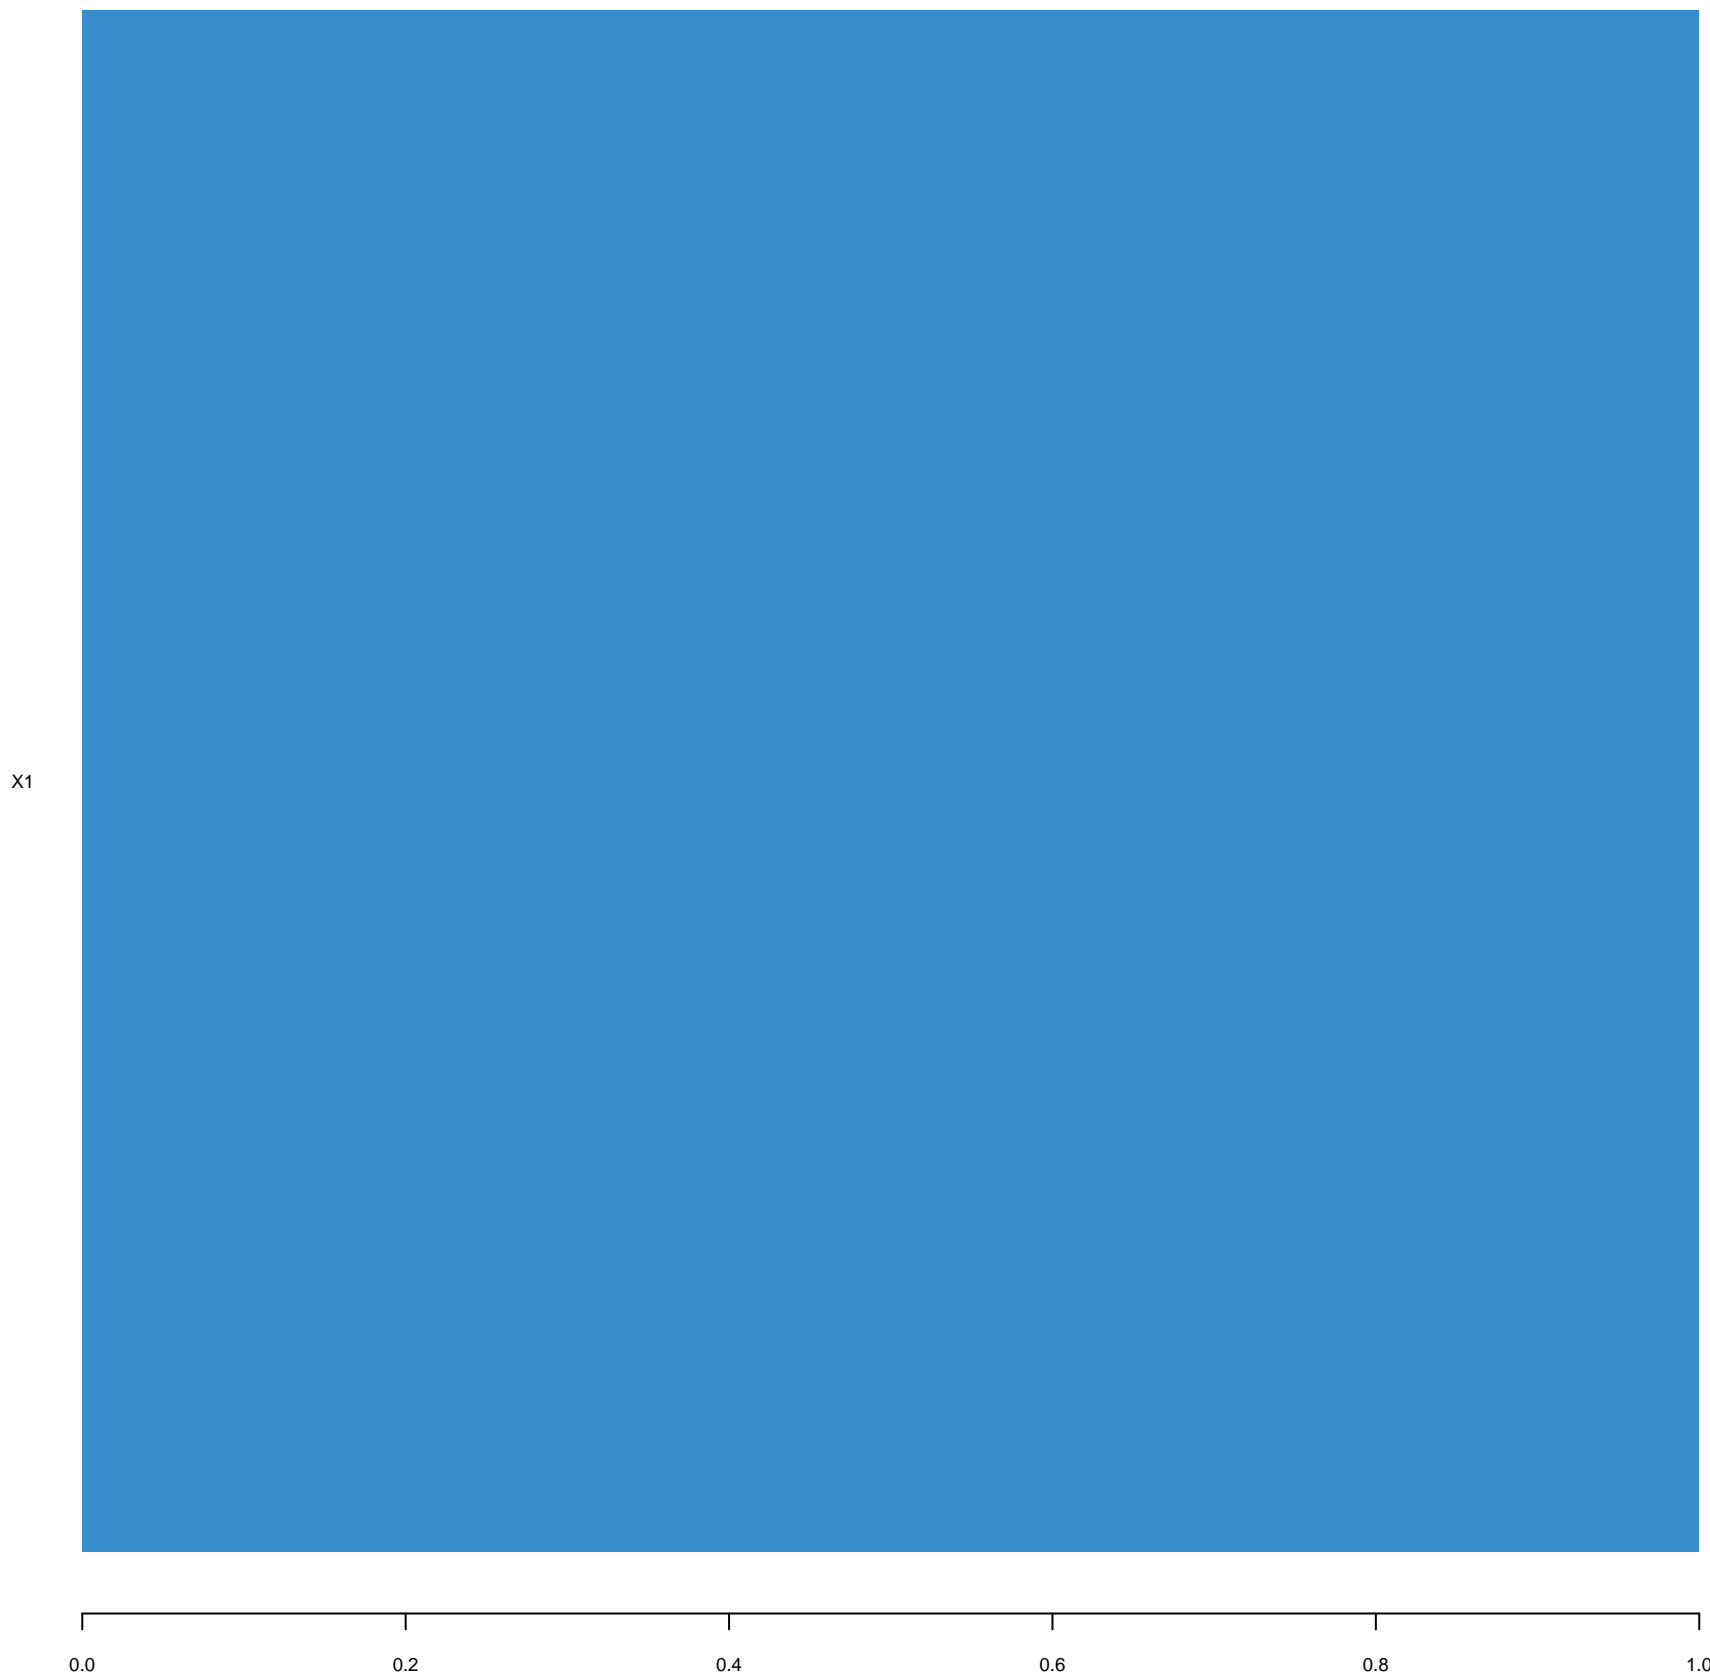

Supplement: s1 [file s1]
