# Supplementary material for: Multiomics Picture of Obesity in Young Adults
Source: Biology (Basel). 2024 Apr 18;13(4):272. doi: 10.3390/biology13040272 (PMC11048234; doi:10.3390/biology13040272)
Supplement: Supplementary file 1 [file biology-13-00272-s001.zip]

Archive with 10 entries (10 files):
- Document_S1.pdf
- Document_S2.pdf
- Figure S1.pdf
- Figure S2.png
- Table S1.xlsx
- Table S2.xlsx
- Table S3.xlsx
- Table S4.xlsx
- Table S5.xlsx
- Table S6.xlsx
