# Supplementary material for: Multiomics Picture of Obesity in Young Adults
Source: Biology (Basel). 2024 Apr 18;13(4):272. doi: 10.3390/biology13040272 (PMC11048234; doi:10.3390/biology13040272)
Supplement: Supplementary file 1 [file biology-13-00272-s001.zip › Table S1.xlsx]

## Sheet: clin + anthro
Anthropometrical and clinical characteristic of individuals under study
Legend					uw	underweight (below 18.5)
LDL	Low-density lipoprotein				norm	lean subjects ( 18-25)
ALT	Alanine transaminase				ow	overweight (BMI 25-30)
AST	Aspartate transaminase				ob_1	obesity stage 1 (BMI 30-35)
ALP	Alkaline phosphatase				ob_2	obesity stage 2 (BMI 35-40)
HDL	High-density lipoprotein				ob_3	obesity stage 3 (BMI > 40)
GGT	Gamma-glutamyltransferase
BR	Bilirubin
WBC	White Blood Cell Count
RBC	Red Blood Cell Count
MCV	Mean corpuscular volume
MCHC	Mean corpuscular hemoglobin concentration
RDW	Red cell distribution width
MPV	Mean platelet volume
LY, %	Lymphocyte percent
MO, %	Monocyte percent
NE, #	Neutrophil number
BA,#	Basophil number
NE, %	Neutrophil percent
BA, %	Basophil percent
EO, %	Eosinophil percent
EO, #	Eosinophil number
LY, #	Lymphocyte number
MO, #	Monocyte number
ESR	Erythrocyte sedimentation rate
BMI	Body Mass Index (calculated)
BMI*	Body Mass Index (estimated by bioimpedance analysis)
WHR	Waist–hip ratio
ID	Sex	Group	Age	Height, m	Weight, kg	BMI, kg/m2	Biochemical blood test																Complete blood count																					Bio-Electrical Impedance Analysis
							LDL, mg/dL	Cholesterol, mg/dL	Glucose, mmol/L	Uric acid, mg/dL	ALT, U/L	AST, U/L	ALP, U/L	Creatine, μmol/L	Urea, mmol/L	Triglycerides, mg/dL	HDL, mg/dL	GGT, U/L	BR, mg/dL	Albumin, g/dL	Total protein, g/l	Globulins, g/dL	WBC, cells/μL	RBC, cells/μL	Hemoglobin, g/dL	Hematocrit, %	MCV, fL	MCH, pg	MCHC, g/dL	RDW, %	Platelets, cells/μL	MPV, fL	LY#, cells/μL	MO#, cells/μL	NE#, cells/μL	EO#, cells/μL	LY%	MO %	NE%	BA#, cells/μL	EO%	BA%	ESR	BMI*, kg/m2	WHR	Lean body mass, kg	Skeletal - muscle body mass, kg	Fat body mass, kg	Total body water, l
1	F	norm	26	1.705	60.7	20.9	3.9	4.46	5.23	272	12	17.3	41.9	90	2.21	0.66	1.4	NA	NA	NA	NA	NA	NA	NA	NA	NA	NA	NA	NA	NA	NA	NA	NA	NA	NA	NA	NA	NA	NA	NA	NA	NA	NA	20.9	0.78	47.5	26.1	13.2	34.7
2	F	norm	26	1.759	66.3	21.4	2.91	4.61	5.18	249	10	17.2	24.8	69	2.97	0.58	1.8	NA	NA	45	73.7	28.7	NA	NA	NA	NA	NA	NA	NA	NA	NA	NA	NA	NA	NA	NA	NA	NA	NA	NA	NA	NA	NA	21.4	0.78	49.8	27.4	16.5	36.5
3	F	uw	30	1.676	49	17.4	2.85	4.58	4.24	176	17	22.3	35.5	61	3.14	0.54	1.6	NA	NA	NA	NA	NA	NA	NA	NA	NA	NA	NA	NA	NA	NA	NA	NA	NA	NA	NA	NA	NA	NA	NA	NA	NA	NA	17.5	0.79	41.5	22.4	7.5	30.5
4	F	norm	34	1.62	65	24.8	3.66	5.27	5.42	216	18	15.1	26.2	45	6.5	0.65	2	NA	NA	NA	NA	NA	NA	NA	NA	NA	NA	NA	NA	NA	NA	NA	NA	NA	NA	NA	NA	NA	NA	NA	NA	NA	NA	25.1	0.86	46.7	25.7	20	24.1
5	M	ow	36	1.86	89	25.7	3.14	6.13	5.58	349	39	24.8	80.3	61	NA	6.51	0.9	NA	NA	NA	NA	NA	NA	NA	NA	NA	NA	NA	NA	NA	NA	NA	NA	NA	NA	NA	NA	NA	NA	NA	NA	NA	NA	25.2	0.85	72.2	41.8	16.7	52.7
6	F	norm	39	1.83	68	20.3	1.78	3.37	4.54	192	44	32.3	41.9	62	3.12	1	1.7	NA	NA	NA	NA	NA	7.06	4.927	144.7	0.443	89.92	29.36	326.5	13.02	143.4	8.84	2.3	0.4	4.4	0	31.9	5.3	62.1	0	0.5	0.3	5	19.4	0.8	48	26.3	17.6	35.2
7	F	norm	32	1.68	62	22	2.21	3.58	4.52	86	16	14.2	35.6	54	5.27	0.28	1.7	NA	NA	NA	NA	NA	4.96	4.404	143.1	0.4404	99.99	32.5	325	11.91	259.5	8.4	1.9	0.5	2.4	0.1	38.4	9.2	49.1	0	2.8	0.5	2	21.9	0.82	49.7	27.5	12.7	36.4
8	M	norm	32	1.78	66.5	21	1.82	3.03	4.72	203	23	23.1	24.1	101	3.6	0.58	1.6	NA	NA	NA	NA	NA	4.17	4.562	138.5	0.4309	94.44	30.35	321.4	13.84	196.8	9.72	1.9	0.4	1.8	0	45.1	10.3	44	0	0	0.6	4	20.6	0.8	62.5	35.7	4.1	45.8
9	F	ob_3	41	1.64	113	42	4.33	5.19	3.19	425	34	35.5	80.1	50	3.08	1.63	2.3	NA	NA	NA	NA	NA	4.18	4.522	130.8	0.4134	91.42	28.93	316.5	13.2	198.6	13.29	1.6	0.3	2.2	0.1	38.4	6.3	51.8	0	3	0.5	14	42	1.05	56.5	32.1	56.5	41.4
10	M	ob_1	18	1.832	108	32.2	3.92	4.76	4.47	577	54	25.9	85.2	78	3.41	1.17	0.7	NA	NA	NA	NA	NA	159	5.504	159	0.4963	NA	NA	NA	NA	298.6	NA	NA	NA	NA	NA	25.4	7.8	64.1	NA	2.5	0.2	NA	32.1	0.9	75	43.1	32.9	54.8
11	F	uw	28	1.64	49	18.2	2.26	4.31	4.23	139	8	10.5	100.2	78	2.22	1.5	2.2	NA	NA	NA	NA	NA	5.68	5.113	130.5	0.4205	82.23	25.52	310.4	14.55	257.3	10.61	2.4	0.3	2.9	0.1	41.7	6.1	50.6	0	1.1	0.5	13	18.2	0.78	35.5	18.9	13.6	26.1
12	F	ow	30	1.58	72	28.8	3.75	4.76	4.45	291	8	13.9	73.5	63	4.86	1.42	1	NA	NA	NA	NA	NA	7.3	4.294	125.4	0.3992	92.97	29.2	314.1	13.2	281.9	9.68	3.1	0.7	3.3	0.1	42.4	9.1	45.7	0.1	2	0.8	3	28.5	0.89	37.8	20.3	33.7	27.6
13	F	ow	28	1.65	81	29.8	3.68	4.96	4.87	238	17	16.5	88.4	46	4.2	0.75	1.6	NA	NA	NA	NA	NA	8.44	4.667	136.5	0.4207	90.15	29.25	324.5	13.06	295.2	8.89	2.5	0.5	4.9	0.5	29.3	6.1	58.1	0.1	5.7	0.8	31	29.8	0.85	43.4	23.6	37.9	31.7
14	F	norm	32	1.63	63	23.7	3.75	4.76	4.45	291	8	13.9	73.5	63	4.86	1.42	1	NA	NA	NA	NA	NA	4.55	4.781	126.8	0.4035	84.38	26.51	314.2	13.83	285.8	7.79	2.1	0.4	2	0.1	45.4	8.4	43.1	0	2.5	0.6	12	23.7	0.86	41	22.3	22.1	29.9
15	F	ob_3	26	1.67	118	42.3	3.22	4.34	4.87	372	16	14.1	29.1	63	2.5	1.52	0.6	NA	NA	NA	NA	NA	6.68	5.038	136.4	0.4232	84.01	27.07	322.3	13.99	413.7	7.65	2.4	0.7	3.2	0.4	35.8	9.8	48.1	0	5.7	0.6	14	43.8	1.02	56.4	31.9	63.6	41.4
16	M	ow	38	1.72	87.4	29.5	4.64	6.29	5.25	498	27	26.8	56.8	79	4.11	1.92	1	NA	19.01	49.2	72.9	23.7	6.76	5.525	159.5	0.4845	87.69	28.86	329.2	14.01	169.5	10.14	2.3	0.8	3.6	0.1	33.3	11.1	53.9	0	1.3	0.4	4	29.5	0.94	57.9	32.7	29.5	42.6
17	M	norm	23	1.79	71	22.2	2.6	3.66	5	389	26	20.6	49.6	87	4.31	0.54	0.7	15.7	20.1	49.7	75.9	26.2	6.1	5.368	155.7	0.4748	88.45	29	327.9	13.22	202.2	9.82	2	0.5	3.5	0.1	33.5	8	56.7	0	1.4	0.4	4	22.2	0.85	55.1	30.7	15.7	40.5
18	M	norm	25	1.84	71	21	3.44	4.83	5.11	277	14	17.1	55.4	68	3.43	1.19	1	16.3	48.71	46.6	67.7	21.1	4.88	5.671	157.5	0.4822	85.02	27.77	326.6	13.12	194.8	9.09	2	0.4	2.4	0	42	8.1	48.6	0	0.9	0.4	5	21.1	0.82	59.9	33.8	11.2	44.1
19	F	norm	31	1.59	53.8	21.3	2.91	4.47	4.61	107	9	13.6	14.3	55	4.1	0.62	1.1	12.5	9.15	45.5	62.2	16.7	4.93	4.167	128	0.3974	95.37	30.71	322	12.74	250.6	9.51	1.9	0.3	2.6	0.1	37.9	7.1	53.2	0	1.4	0.4	5	20.6	0.81	37.5	20.1	15	27.6
20	F	norm	38	1.76	65	21	2.82	4.87	4.15	304	NA	NA	23.3	65	3.51	0.61	1.4	14.9	35.14	44	64.6	20.6	7.17	4.518	127	0.3916	86.68	28.11	324.2	13.59	224.3	8.56	2.5	0.7	3.9	0.1	35.1	9.3	53.9	0	1.3	0.4	4	21.5	0.82	49.9	27.3	14.6	36.7
21	F	norm	23	1.67	59.2	21.2	2.57	4.2	4.51	367	7	14.5	45.1	58	2.31	0.57	1.1	10.6	8.35	44.1	68.3	24.2	5.32	5.001	126.3	0.3968	79.35	25.25	318.2	15.19	208.6	9.5	2	0.5	2.7	0.1	38.3	9.1	50.1	0	1.8	0.7	7	21.3	0.79	38.8	20.8	20.3	28.3
22	M	ob_2	29	1.87	119.6	34.2	2.67	3.85	4.79	232	NA	NA	47.2	61	6.44	0.8	0.9	62.3	10.25	45.4	69.6	24.1	5.99	4.279	135.5	0.4152	97.04	31.68	326.5	12.91	221.5	8.88	1.2	0.5	4.2	0	20	8	70.9	0	0.7	0.4	10	34.2	0.99	71.9	40.4	47.7	52.7
23	M	ob_1	30	1.82	110.2	33.3	3.55	4.78	5.14	495	18	12.3	47.2	76	3.31	0.86	0.8	20.9	NA	50.7	75.6	24.9	6.12	5.259	147.3	0.461	87.66	28	319.5	13.14	231.1	10.54	1.8	0.5	3.4	0.4	29.9	8.2	55.6	0	5.9	0.4	8	33.3	0.94	69.4	39.2	40.8	50.8
24	M	norm	35	1.676	67	23.9	4.36	5.78	4.65	521	41	28	62.2	79	3.27	1.28	0.8	22.6	7.37	49.6	79.7	30.1	9.48	4.678	140.2	0.4335	92.68	29.97	323.4	13.5	331.4	8.47	2.5	0.6	6.2	0.1	26.2	6.3	64.9	0.2	0.9	1.7	NA	23.8	0.89	49.8	27.6	17.1	36.6
25	M	ow	40	1.88	91.5	25.9	2.45	3.83	5.05	250	23	22.4	40.8	93	3.49	0.7	1	26.3	11.61	45.9	73	27.1	4.56	4.946	144.6	0.4443	89.85	29.24	325.5	13.03	209.6	8.61	2.2	0.3	1.7	NA	48.7	7.6	36.9	0	6.1	0.7	NA	25.9	0.83	83.3	47.9	8.2	61.1
26	M	ob_1	29	1.891	107.8	30.1	2.9	4.77	5.37	289	31	20.3	51.1	71	7.22	6.56	0.6	24.4	4.54	48.4	70.2	NA	7.72	4.721	15.1	0.4494	95.19	31.78	333.9	13.28	224.8	8.95	2.9	0.7	3.7	0.3	38.1	9.6	48.4	0	3.6	0.3	5	30.1	0.88	79.8	44.9	28	58.7
27	M	norm	25	1.746	66	21.6	2.78	4.14	5.15	382	12	15	40.9	74	3.82	1.38	0.8	18.8	13.11	51.4	77.1	25.6	5.38	5.064	151.5	0.4657	91.98	29.93	325.4	13.28	163.3	9.99	2.6	0.5	2.2	0.1	48.1	8.7	40.3	0	2.5	0.4	3	21.6	0.83	57.4	32.9	8.6	41.9
28	F	norm	31	1.73	68.2	22.8	3.25	4.76	5.34	262	10	15	26.1	71	2.96	0.93	1.2	12.9	45.54	48.5	73.2	24.7	3.61	4.848	141.9	0.4399	90.74	29.28	322.7	13.91	224.7	8.74	1	0.2	2.3	0.1	28.9	6.4	62.6	0	1.5	0.6	5	22.8	0.81	52	28.8	16.2	38.2
29	M	norm	43	1.778	68.5	21.7	3.89	5.44	5.72	276	36	18.7	27.9	80	4.28	1.3	0.9	25.5	6.35	47	66	19	6.12	4.722	153	0.463	98.03	32.39	330.4	12.86	217.7	8.61	1.4	0.5	3.8	0.3	23.5	8	62.8	0	5.1	0.6	4	21.7	0.86	56.4	31.7	12.1	41.3
30	M	ow	37	1.723	80.9	27.3	2.91	4.47	4.31	354	15	17.2	36.1	85	5.58	0.61	1	22.1	10.05	46.4	70.3	23.9	5.59	4.49	135.1	0.4201	93.55	30.1	321.7	12.82	255.3	8.5	2.5	0.7	2.3	0.1	44.3	12.2	41.1	0	1.8	0.6	5	27.2	0.88	67.2	38.3	13.7	49.4
31	M	ob_1	31	1.72	92	31.1	3.53	4.84	4.7	559	22	23.4	66.7	80	3.31	1	0.9	23.8	19.74	50.2	79.1	29	8.37	5.688	171.1	0.519	91.24	30.08	329.7	13.18	181.1	9.31	2.5	0.9	4.9	0	30.4	10.8	58.4	0	0.2	0.2	4	31.9	0.94	66.2	38.5	26.4	48.3
32	M	ow	42	1.786	86.8	27.2	4.1	5.75	5.01	440	38	24.6	29.4	74	5.73	1.29	1	105.1	8.49	50.5	71.7	21.2	6.42	4.625	148	0.454	98.16	32	326	13.79	446.9	9.14	2.4	0.3	3.4	0.3	36.8	4.7	53.6	0	4.3	0.6	22	27.2	0.9	65.2	37	21.6	47.6
33	M	ob_1	32	1.783	107.4	33.8	4.77	6.32	5.31	412	28	20.7	41.5	85	3.56	1.39	0.9	32.9	11.72	50.5	76	25.5	6.88	5.713	165.9	0.5084	88.98	29.03	326.3	13.14	245.3	9	2.3	0.5	3.9	0.2	33.4	7	56	0.1	2.7	0.9	1	33.8	0.94	72.6	41.4	34.8	53.2
34	M	norm	27	1.794	79.9	24.8	2.13	3.42	5.45	470	20	18.7	28	73	4.63	0.8	0.8	20.6	9.54	48	75.2	27.1	8.65	5.123	152.7	0.4687	91.49	29.8	325.7	12.39	266.7	9.34	2.8	0.5	4.8	0.4	31.8	5.9	55.5	0.1	5.2	1.6	7	24.8	0.86	64.1	36.6	15.8	47
35	M	norm	28	1.84	83.4	24.6	3.6	4.81	4.42	404	43	23.6	37.9	78	5.15	0.56	0.8	25.7	7.82	47.3	66.5	19.2	6.83	5.647	161.5	0.4994	88.44	28.6	323.4	12.33	237.9	10.04	2.4	0.6	3.7	0.1	34.4	8.6	54.7	0	1.6	0.7	2	24.6	0.86	64	36.3	19.4	46.9
36	F	norm	28	1.7	64	22.1	3.08	5.12	5.02	247	14	16.8	32.3	64	3.5	0.71	1.5	16.8	16.13	46	70.7	24.7	5.25	4.893	136.8	0.427	87.28	27.96	320.3	13.29	260.4	7.41	1.4	0.3	3.1	0.3	26.8	6.5	59.9	0	6	0.8	7	21.8	0.8	46.1	25.5	17.2	33.7
37	F	ow	32	1.618	69.3	26.5	3.89	5.78	4.63	260	9	12.5	29	75	3.03	0.69	1.3	16.5	8.19	44.8	68.4	23.5	6.51	4.416	132	0.3985	90.25	29.88	331.1	12.86	280.9	9.36	1.8	0.3	4.3	0	27.9	4.6	66.2	0	0.6	0.7	NA	26.5	0.88	47.5	26.4	21.8	34.8
38	M	ow	31	1.844	90.5	26.6	4.34	5.41	4.39	424	68	35.1	50.1	89	4.24	1.7	0.6	19.4	10.22	46.8	67.7	21	3.49	5.044	142.1	0.4424	87.71	28.17	321.2	14.56	165.3	11.29	1.5	0.5	1.5	0.1	42.7	13	41.8	0	1.8	0.7	7	26.6	0.86	73.9	41.8	16.6	54.2
39	M	ob_2	23	1.795	122.2	37.9	3.22	4.17	4.44	809	164	98.4	52.4	83	2.57	1.73	0.6	60	16.25	NA	NA	NA	5.77	5.352	158.4	0.4902	91.59	29.6	323.2	13.01	212.3	9.75	2.6	0.5	2.6	0.1	44.4	8.4	45	0	1.6	0.6	3	37.9	0.97	72	41.1	50.2	52.7
40	M	ob_1	19	1.851	109.5	32	3.16	4.27	3.97	496	17	14.1	35.8	85	2.87	1.45	0.5	18.5	22.44	46.5	68.6	22.1	5.4	5.114	154.3	0.4856	94.96	30.16	317.6	13.11	241.8	10.25	1.8	0.5	3	0.1	34	8.5	55	0	1.9	0.6	5	32	0.88	84.4	49.1	25.1	61.5
41	M	ob_2	25	1.87	133.8	38.3	2.73	3.77	3.66	691	38	31.5	43.2	68	3.25	1.51	0.6	35.2	8.16	47.2	71.4	24.2	6.64	5.711	167.2	0.5176	90.63	29.27	323	13.24	303.8	8.29	3.2	0.5	2.7	0.2	48.5	7.7	40.6	0	2.5	0.7	7	38.3	0.95	79.7	45.2	54.1	58.2
42	M	ob_3	22	1.77	133.8	42.7	5.22	6.76	4.65	689	106	45.3	111.4	74	4.24	2.76	0.7	79.4	8.36	52.2	79	26.8	8.13	5.213	157.6	0.4793	91.94	30.22	328.8	13.26	290.7	9.07	2.5	0.5	4.6	0.3	31.2	6.6	56.9	0.1	3.9	1.4	17	43.1	1.02	72.4	61.5	53	33.1
43	M	ob_1	25	1.65	83.4	30.6	3.9	5.37	3.58	552	18	18.4	54.9	81	5.8	1.08	1	27.6	15.79	47.5	70.7	23.2	5.31	5.389	158.4	0.4802	89.11	29.39	329.9	12.71	224.3	8.22	1.8	0.5	2.7	0.3	33.8	8.9	51.4	0	5.4	0.5	8	30.6	0.94	57.7	32.9	25.7	42.2
44	M	norm	36	1.751	62	20.2	2.87	4.17	4.38	337	16	16.8	51.3	80	4.86	0.88	1	22.8	16.9	46.6	70.8	24.2	6.8	4.741	144.5	0.4461	94.1	30.47	323.8	12.6	230	8.28	2.3	0.6	3.4	0.6	33.5	8.4	49.4	0	8.1	0.6	4	20.2	0.82	57.3	32.1	4.7	42.2
45	F	ow	22	1.656	76.5	27.9	3.23	4.51	3.87	459	24	25.5	32	74	3.69	1.09	0.8	16.2	12.02	51	75.6	24.6	6.01	4.889	141	0.4367	89.32	28.84	322.9	12.7	281.7	7.87	1.9	0.4	3.6	0	31.3	7.3	60.2	0	0.7	0.5	6	27.7	0.86	45.7	25.5	30.2	33.3
46	M	ob_3	36	1.78	198	62.5	4.51	5.96	5.28	517	30	21	45.1	60	5.5	1.29	0.8	26	10.64	47.2	77.9	30.6	9.27	5.2	152	0.473	NA	NA	NA	NA	268	NA	NA	NA	NA	NA	27.1	9.3	61.1	NA	1.9	NA	21	62.7	1.15	88.2	50.3	109.5	65.8
47	M	ob_3	34	1.79	153	47.8	2.67	3.96	4.9	441	24	21.7	45.4	78	3.32	1.5	0.9	26.9	NA	46.6	75.3	28.6	8.61	5.08	152.8	0.47	NA	NA	NA	NA	218.1	NA	NA	NA	NA	NA	25.8	7.6	60.3	NA	5.9	0.4	9	47.8	NA	NA	51.8	64.3	NA
48	M	ow	31	1.828	91.3	27.3	4.5	5.35	4.88	210	78	63.3	31.8	112	3.97	0.63	0.4	15.3	21.12	49	71.7	22.6	7.1	6.026	179.1	0.5641	93.61	29.72	317.5	15.53	293.6	8.5	1.7	0.8	4.4	0.1	23.8	11.5	62.5	0	1.6	0.6	1	27.3	0.87	71.5	28	19.8	51.6
49	M	ob_3	34	1.84	183	54.1	1.78	2.56	NA	524	40	26.8	48.6	74	4.02	1.58	0.4	28.1	NA	46.4	71.2	24.7	6.55	3.098	123.9	0.383	123.6	40	323.6	16.43	274	8.35	2.2	0.4	3.6	0.3	33.1	6.2	55.6	0	4.4	0.7	20	54.1	1.06	94.6	53.7	88.44	70
50	F	ob_1	36	1.65	95	34.9	4.17	5.38	4.18	365	19	19.5	14.4	83	5.07	1.31	1	13.2	11.69	44.2	68.9	24.8	7.99	4.039	123.6	0.3843	95.13	30.61	321.8	13.67	259.2	10.35	3.3	0.8	3.4	0.4	41.5	10.5	42.2	0	5.3	0.5	12	34.2	0.96	51.9	29.2	42.9	38
51	F	ob_3	38	1.627	118.5	44.8	3.57	4.69	5.67	534	35	22.6	35.9	69	3.25	1.53	0.8	29	10.71	45	73.3	28.3	12.22	4.936	136	0.4208	85.24	27.56	323.3	14.13	392.2	9.76	3.7	0.9	7.2	0.3	30	7.7	59.1	0.1	2.6	0.6	10	44.8	1.08	59.2	33.3	59.3	43.5
52	M	ob_3	28	1.67	137	49.1	4.55	5.45	3.72	394	43	28.6	69.1	69	4.11	1.1	0.7	34.5	6.09	48.1	74.7	26.6	9.23	5.438	138.4	0.4511	82.95	25.46	306.9	15.4	320.5	9.75	3.1	0.9	5	0.2	33.8	9.4	53.8	0.1	2.5	0.5	25	49.3	1.09	68.2	38.3	69.3	50.5
53	M	ob_3	40	1.738	159.1	52.7	2.38	2.93	NA	488	52	28.4	62.5	88	4.65	1.27	0.4	34	8.15	44.5	79.2	34.7	9.16	5.246	148.4	0.4699	89.58	28.29	315.8	14.16	275.3	9.68	2.5	0.6	5.8	0.2	27.6	7.1	63	0	1.8	0.5	25	52.7	1.11	76.8	44.1	82.3	56.8
54	F	ob_3	39	1.55	104	43.3	3.6	4.53	4.78	744	76	44.3	57.9	83	6.59	1.45	0.8	49	22.16	49.9	77.8	27.9	10.07	6.166	181.7	0.5534	89.75	29.47	328.4	13.68	258.2	11.44	2.9	0.7	6.4	0.1	28.4	6.5	63.8	0.7	0.6	0.7	1	43	1.1	51.6	29.5	52.3	37.8
55	M	ow	28	1.75	87	28.4	3.14	4.21	4.81	415	21	20.4	65.3	99	6.5	1.35	0.8	22.8	9.85	48.7	77.1	28.4	9.33	5.54	160.4	0.4966	89.65	28.96	323.1	13.61	311	8.01	2.3	0.8	6	0.1	24.8	9.1	64.3	0.1	1.2	0.6	NA	28.4	0.89	67.3	38.8	19.8	49.2
56	M	ow	28	1.647	77.8	28.7	2.57	4.07	4.47	339	38	25.4	68.6	99	6.37	0.95	1.2	26	30.19	48.9	75.8	26.9	12.55	5.4	166.1	0.5138	95.14	30.75	323.2	12.98	219.9	9.17	2.2	1	9.1	0.2	17.5	8.2	72.5	0	1.4	0.4	1	28.7	0.91	58.4	33.3	19.4	42.9
57	M	ob_1	29	1.782	110.1	34.7	3.36	4.73	5.7	366	24	16.4	42	77	3.93	3.47	0.7	33.7	10.99	48.2	70.6	22.4	8.36	5.698	151.5	0.4655	81.69	26.59	325.5	13.49	311	8.41	2.7	0.7	4.5	0.4	32.6	8	54	0	5	0.4	5	34.7	0.94	73.5	41.9	36.6	54
58	F	ow	44	1.764	82	26.4	3.71	4.69	4.33	204	10	15.9	26.7	69	3.62	0.93	0.7	13.4	6.35	43.2	69.7	26.5	6.53	4.266	126.1	0.404	94.7	29.56	312.1	12.63	169.8	10.26	1.7	0.4	4	0.3	26	6.8	61.1	0.1	5.3	0.8	15	26.3	0.88	58	32.3	24	42.6
59	F	ob_3	39	1.718	120.8	40.9	2.65	4.08	4.65	199	15	12	48.4	63	5.29	1.78	1.1	17.2	6.13	45.9	71.7	25.8	6.67	4.278	126.5	0.3985	93.14	29.58	317.6	13.75	295.4	8.01	1.5	0.4	4.6	0.1	22.3	6.3	69.3	0.1	1.1	1	18	40.9	0.99	68.1	38	52.7	50.1
60	M	ob_2	29	1.812	116.9	35.6	3.88	5.33	5.22	423	72	34.4	74.8	69	2.79	3.11	0.7	70.1	6.53	48.6	75.4	26.8	6.07	5.377	157.7	0.4886	90.87	29.33	322.8	13.39	233.8	9.67	1.5	0.6	3.8	0.1	24.1	10.2	63.1	0	2	0.6	10	35.6	0.94	76.9	44.9	40	55.8
61	F	ob_2	26	1.68	112.3	39.8	1.94	3.09	5.36	220	15	12.1	48.8	64	4.27	0.85	0.8	21.6	9.62	44	69	25	4.75	4.698	129.5	0.4095	87.16	27.57	316.3	15.25	189.4	11.92	1.6	0.3	2.7	0.1	33.3	6.4	57.4	0	2.4	0.5	20	39.8	0.98	53.9	29.7	58.4	39.6
62	M	ob_3	29	1.85	155	45.3	3.65	4.76	5.14	478	31	16.2	46.5	83	5.21	1.25	0.8	49.7	11.09	45.5	73.6	28.2	9.63	5.121	150.2	0.4602	89.86	29.32	326.3	13.61	273	9.85	2.9	0.9	5.5	0.2	30.6	9.4	56.8	0.1	2.4	0.8	34	44.2	0.98	92.5	53	60.7	68
63	F	ob_3	32	1.527	97.5	41.8	3.94	4.72	4.91	355	27	18.9	54	73	4.15	1.97	0.5	27.7	11.66	47.6	77.4	29.8	12.82	4.935	133.7	0.4272	86.55	27.1	313	14.7	273.3	10.12	4.3	0.7	7.6	0.2	33.3	5.3	59.2	0	1.9	0.3	4	41.8	1.05	44.9	25.3	52.6	33
64	F	ob_1	40	1.45	73	34.7	2.08	3.59	4.32	283	8	12.2	29.8	70	6.33	0.93	1.2	11.7	12.27	43.7	65.2	21.4	7.04	4.289	134.5	0.4158	96.94	31.37	323.6	13.11	271.2	9.22	2.9	0.5	3.5	0.1	41.7	6.6	49.5	0	1.5	0.7	3	34.7	1	39.1	21.5	33.9	28.7
65	M	ob_1	25	1.821	106.4	32.1	3.52	4.94	4.36	281	12	19.3	50.3	105	5.63	0.64	1.2	18.7	12.55	47.8	64.5	16.8	5.67	5.078	145.9	0.4602	90.63	28.74	317.1	13.54	215.4	8.27	2.1	0.5	2.9	0.2	37.6	8.8	50.3	0	2.9	0.4	2	32.1	0.89	83.1	48	23.3	60.7
66	F	ob_1	34	1.628	91.2	34.4	2.95	3.96	4.76	325	16	16.9	43.1	67	5.25	0.62	0.8	20	6.68	53.2	74.3	21	7.41	4.873	141.5	0.4387	90.02	29.03	322.5	12.92	334.1	8.55	2.4	0.5	4.4	0.1	31.9	6.7	59	0.1	1.7	0.7	11	34.4	0.92	57.8	32.6	33.4	42.1
67	F	ob_1	42	1.54	72	30.4	2.59	4.04	3.88	250	18	20.1	31.9	66	4.12	0.54	1.2	22.1	12.9	47.7	62.9	15.2	9.16	4.04	113.7	0.3615	89.48	28.13	314.4	13.67	231.6	9.28	2.4	0.7	5.8	0.1	26.4	8.1	63.8	0.1	1	0.7	7	30.4	0.95	44.3	24.2	27.8	32.5
68	F	ob_1	20	1.687	96.7	34	3.01	4.05	4.42	244	11	16.2	68.2	63	3.53	0.44	0.9	12.4	5.75	51	69.1	18.1	9.4	4.915	137.8	0.4334	88.18	28.04	318	13.23	260.3	9.62	1.9	0.5	6.7	0.3	20.2	5.5	70.8	0	3.1	0.4	10	34	0.89	58.5	33.1	38.2	42.8
69	F	ob_1	41	1.595	76.8	30.2	3.28	5.12	4.33	240	10	15.4	38.9	71	3.45	0.59	1.6	13.3	8.89	50.5	69.4	18.9	6.97	4.748	138.1	0.4365	91.93	29.08	316.4	13.54	315.5	8.33	2.4	0.7	3.6	0.2	34.5	9.8	52.2	0.1	2.8	0.7	6	30.2	0.94	41.8	22.6	35	30.7
70	F	ob_1	27	1.74	100	33	2.63	3.41	5.27	456	19	19.9	33.3	66	3.38	1.13	0.6	23	5.43	47.9	66.3	18.5	6.74	4.5	132.9	0.4179	92.87	29.53	317.9	14.09	264.3	10.92	1.9	0.4	4.3	0.1	28.1	5.9	63.5	0	2.1	0.4	9	33	0.96	54.3	30.1	45.3	39.7
71	M	ow	27	1.96	113.3	29.5	2.95	4.24	5.26	400	28	22.1	56.5	97	4.95	1.88	0.8	30.8	6.63	51.2	73.4	22.2	7.7	5.286	150	0.471	89.1	28.38	318.5	13.47	263.3	9.63	2.7	0.9	3.7	0.3	35.4	11.1	48.7	0	4.2	0.6	5	29.5	0.85	87.7	50.3	25.6	64.3
72	F	ob_1	20	1.56	82.2	33.8	2.87	4.14	5.33	391	27	22.7	54.4	98	4.93	1.85	0.8	31.1	6.82	51.6	73	21.4	7.83	5.256	150.3	0.469	89.24	28.6	320.5	13.2	256.3	9.44	2.7	0.9	3.8	0.3	34.8	11.6	48.8	0.1	4	0.8	4	33.8	1.01	45.4	24.9	36.8	33.3
73	F	ob_3	36	1.691	116.8	40.8	2.79	3.68	6.65	311	29	26.8	43.4	72	4.28	2.09	0.6	25.1	7.09	47.4	71.1	23.7	8.5	4.594	125.2	0.3903	84.97	27.25	320.7	14.38	272.3	10.33	3.1	0.6	4.5	0.3	36.6	6.6	53	0	3.4	0.4	7	32.3	40.9	57.5	32.3	59.3	42
74	F	ob_2	38	1.63	96.5	36.3	2.92	3.89	5.09	300	43	30.8	60	65	3.13	1.49	0.8	12.1	9.67	47.4	67.2	19.8	5.79	4.374	123.4	0.3934	89.94	28.21	313.7	15.94	235.4	9.18	1.5	0.6	3.5	0.1	26.7	10.7	59.9	0	2.3	0.4	11	36.3	0.98	52.5	29.3	44	38.5
75	M	ob_2	42	1.65	98.2	36.1	3.88	4.44	5.09	389	51	77.3	43.6	NA	3.78	1.01	0.7	18.8	11.18	49.4	67.2	17.8	5.31	5.015	149.9	0.4532	90.36	29.88	330.7	12.98	287.6	8.5	2.1	0.5	2.5	0.1	40	10.1	47.7	0	1.7	0.5	3	36.1	1.01	59.1	33.7	39.1	43.5
76	F	ob_1	25	1.719	90.1	30.5	2.8	3.89	4.21	438	25	20.5	31.8	67	3.32	1.74	1	12.3	6.34	50.4	72.5	22.1	5.69	4.613	134.9	0.4096	88.79	29.25	329.4	12.55	318.7	9.8	2.1	0.5	2.9	0.2	37.5	8.2	50.3	0	3.3	0.7	5	30.5	0.9	50.6	28.1	39.5	36.9
77	F	ob_3	37	1.652	114	41.8	3.11	4.37	5.45	314	26	19.9	40.8	66	3.73	0.83	1.2	13.8	5.11	44.1	68	24	8.18	5.056	145	0.4498	88.96	28.68	322.3	13.48	230.9	9.11	2.4	0.5	5.2	0.1	29.9	5.6	63.2	0	0.9	0.4	15	41.8	1.03	55	30.7	59	40.4
78	M	ob_2	39	1.65	99.3	36.5	1.89	2.54	4.32	407	39	28.4	46.9	90	7.05	1.31	0.7	26.2	11.28	52.5	73.4	20.9	10.1	5.632	174.4	0.5188	92.11	30.97	336.2	12.67	197.6	9.64	2.6	0.8	6.2	0.5	25.7	8.1	61.2	0	4.7	0.3	1	36.5	1	63.2	35.9	36.1	46.7
79	F	ob_2	34	1.66	101.1	36.7	2.84	3.9	5.86	290	22	13.7	60.1	70	4.47	0.92	1.1	13.5	6.1	45.9	66.1	20.1	6.91	4.634	139.6	0.4205	90.73	30.12	331.9	14.02	36.6	8.39	1.8	0.5	4.4	0.2	25.4	6.9	64.3	0	2.9	0.5	15	36.7	0.99	49.7	27.3	51.4	36.4
80	F	ob_2	18	1.6	91.9	35.9	1.72	3.09	5.55	290	8	11.4	58.4	61	3.74	0.71	1.2	14.5	5.25	49.1	68.8	19.8	5.08	5.247	113.9	0.3719	70.88	21.7	306.2	16.46	223.1	11.07	1.7	0.5	2.7	0.2	33	9	52.7	0	4.8	0.5	9	35.9	0.96	44.3	24.2	47.6	32.5
81	M	ob_2	43	1.868	126.1	36.1	2.36	3.24	6.06	419	18	18	35.5	85	4.3	1.36	0.7	27.5	11.2	47.8	66.9	19.1	10.35	5.14	142.2	0.445	86.57	27.66	319.5	15.22	286.4	8.52	3	1	5.7	0.6	29.4	9.4	54.6	0	6.1	0.5	2	36.1	0.94	87.1	49	39	64.1
82	M	ob_3	41	1.926	172.5	46.5	4.15	5.48	5.56	484	63	49.1	37	107	6.21	4.58	0.7	41.7	13.98	52.5	72.3	19.7	7.21	4.955	152.5	0.4685	94.55	30.77	325.5	13.93	217.2	9.11	3.2	0.6	3.2	0.3	43.8	8	43.8	0	3.8	0.6	2	46.5	1.03	105.6	61.2	66.9	77.4
83	F	ow	26	1.5	57.8	25.7	3.19	4.34	3.6	246	13	13.3	40.8	63	5.26	1.16	0.9	13.2	7.34	45.9	68.8	23	8.58	4.506	134.1	0.416	92.32	29.75	322.2	12.33	273.7	9.25	2.3	0.8	5.4	0.1	26.2	9.1	63	0	1.3	0.4	23	25.7	0.87	35.2	22.6	25.8	25.8
84	F	ow	27	1.754	84.4	27.4	2.8	4.16	5.41	263	16	17.5	37.6	80	7.16	0.68	1.1	17.6	11.2	48.2	67.5	19.2	7.76	4.379	119.4	0.381	87	27.27	313.4	14.02	280.4	9.32	2.9	0.4	46.9	0.7	37.6	5.5	46.9	0.1	9.1	0.9	4	27.4	10.82	54.7	30.3	29.7	39.9
85	F	ow	42	1.62	70.3	26.8	2.14	2.98	4.9	183	12	13.2	37.2	56	3.92	0.7	0.6	11.4	5.88	46.1	66.8	20.7	6.29	4.671	108.7	0.3537	75.72	23.27	307.3	15.4	228.4	10.18	2	0.3	3.8	0.1	32.5	5.1	61	0	1	0.4	2	26.8	0.93	46.8	25.8	23.5	34.4
86	M	ob_2	21	1.678	100.9	35.8	3.18	3.81	4.36	53.6	50	26.5	44.6	93	3.05	1.76	0.4	24.6	10.28	56.6	74.3	17.7	6.81	6.084	174.1	0.5407	88.89	28.61	321.9	12.55	156.2	12.49	2.7	0.6	3.2	0.2	40.2	9.3	47.3	0	2.7	0.5	2	35.78	0.92	66.7	38	34.2	48.8
87	F	ow	44	1.62	70.3	26.8	3.54	5.06	4.11	276	19	22.5	50.3	69	6.17	1.25	1	21.4	8.8	48.7	72.7	24.1	3.84	4.291	139.6	0.4258	99.23	32.53	327.8	13.31	234.4	8.25	1.7	0.5	1.6	0.1	43	12.6	41.5	0	2.3	0.6	2	26.8	0.93	46.8	25.8	23.5	34.4
88	M	ow	26	1.79	94.5	29.5	3.55	4.5	4.94	3.91	49	25.1	62	75	3.91	0.73	0.8	58	9.99	53	73.1	20	6.73	5.209	154.4	0.4708	90.37	29.64	328	13.54	314.7	8.04	3	0.5	2.7	0.4	45.3	8.1	39.7	0	6.2	0.7	2	29.5	0.89	71.2	40.2	23.3	52.3
89	F	ob_3	31	1.722	133.1	44.9	2.69	3.69	5.31	315	13	12.4	54.5	68	4.41	0.56	0.9	16.2	16.95	46.4	65.1	18.7	9.34	4.229	126.8	0.3854	91.13	29.98	329	13.59	279.8	8.7	2.4	0.7	6.2	0	26.1	7	66.1	0	0	0.3	6	44.9	1	64.9	36.6	68.2	47.6
90	F	ob_2	36	1.68	106.4	37.7	2.67	3.78	NA	375	17	10.7	38.8	58	3.75	2.28	0.7	NA	3.8	45	70.4	25.3	8.15	4.516	125.8	0.3924	86.9	27.86	320.5	12.31	385.7	7.75	3.2	0.3	4.2	0.4	39.2	3.8	51.4	0.1	4.8	0.8	7	37.7	1.07	53.1	29.2	53.3	39
91	M	ob_3	33	1.73	137.7	46	4.18	4.98	4.43	557	9	10.9	82.6	78	4.04	1.6	0.5	24.6	10.4	55.9	76.5	20.6	12.7	5.264	148	0.4682	88.94	28.18	316.8	14.58	307.6	9.82	2	0.8	9.4	0.4	16.1	6.3	73.9	0	3.5	0.2	10	44.9	1.06	65.1	36.3	70.7	47.8
92	F	ob_2	23	1.687	100	35.1	3.36	4.65	4.75	317	27	23.4	74.8	71	4.46	0.75	1	21.1	16.93	48.8	67.7	18.9	6.65	5.059	141.2	0.4461	88.18	27.91	316.5	14.14	227.1	9.31	1.9	0.6	4	0.1	29.3	8.9	59.6	0	1.7	0.5	9	100	35.1	0.87	31.9	42.7	42
93	M	ob_2	32	1.58	88.9	35.6	2.32	3.61	4.82	338	22	21	57	92	5.96	0.41	1.2	17.9	7.59	51.3	71	19.7	7.83	5.283	156.4	0.485	92.6	29.87	322.5	13.29	231.1	9.07	3	0.4	4.2	0.1	38.7	5.5	53.6	0	1.8	0.4	2	35.6	1.02	52.5	29.8	36.4	38.5
94	F	ob_3	36	1.753	175.7	57.2	4.47	5.94	5.2	367	14	12.8	62.5	73	5.69	2.23	1.2	24.9	7.29	49.1	73.1	24	9.01	5.21	134.7	0.4313	82.78	25.84	312.2	14.6	329.7	8.15	2.5	0.6	5.7	0.2	27.2	7.1	63.4	0.1	1.7	0.6	16	57.2	1.14	82.5	46.1	93.2	61.4
95	F	ow	32	1.568	64.3	26.2	4.01	5.08	4.42	241	9	10.5	34.4	60	4	0.77	1.1	13.3	9.79	49.5	66.5	16.9	6.81	4.827	143.1	0.4334	89.8	29.65	330.2	12.64	227.3	9.34	0.9	1	4.8	0.1	12.6	15.2	70.3	0.4	1.5	0.4	3	26.1	0.89	40.9	22.4	23.4	30
96	M	ob_2	33	1.87	131	37.5	2.61	3.55	4.83	428	47	23.7	54.4	79	5.64	1.29	0.7	33.5	18.87	49.8	68.6	18.8	8.43	5.175	146.1	0.4552	87.97	28.24	28.24	13.66	199.1	10.32	2.6	0.8	4.9	0.2	30.4	9	57.8	0	2.3	0.5	3	37.4	0.95	82	46.3	48.7	60.3
97	F	ob_2	33	1.67	104	37.3	3.55	4.97	4.62	336	26	18.1	107.5	68	6.11	0.84	1.2	18.1	NA	45.7	65.6	19.9	6.19	4.943	132.6	0.418	84.56	26.83	317.2	15.05	258.4	9.6	2.4	0.3	3.3	0.1	39.3	4.5	52.6	0.1	2.1	1.5	10	37.1	0.97	51.6	28.4	51.9	37.8
98	F	ob_2	41	1.718	105.5	35.7	3.3	4.67	4.87	311	14	17.6	41.1	86	5.15	0.7	1.2	14.3	14.43	49	64.4	15.4	5.77	4.977	138.6	0.4311	86.61	27.86	321.6	14.02	202.8	8.52	1.2	0.5	3.9	0.1	21.1	9.3	67.5	0	1.4	0.7	3	35.8	0.92	66.5	37.6	39	48.7
99	F	ob_2	33	1.646	101.7	37.5	4.03	5.21	4.3	305	22	17.5	33.8	66	6.99	1.3	0.9	25.2	NA	47.3	66.7	19.3	7.92	4.768	141.3	0.4391	92.09	29.64	321.9	13.36	268.9	9.04	2.5	0.7	4.6	0.2	31.2	8.6	57.5	0.1	1.9	0.8	2	37.5	1	56.8	31.8	44.9	41.7
100	M	ob_3	18	1.816	165.6	50.2	4.03	5.51	4.53	394	27	13.8	32.4	69	2.99	2.29	1.2	24.5	NA	50.7	71.3	20.6	10.75	5.091	144	0.4357	85.59	28.29	330.6	13.41	292	7.87	3.1	0.9	5.9	0.8	29	8.2	54.8	0	7.6	0.4	6	50.2	1.05	78.4	44.4	87.2	57.5
101	M	ob_2	42	1.85	133.8	39.1	3.05	3.82	5.14	353	72	31.6	67.5	83	4.92	1.64	0.7	NA	7.53	50.4	67.2	16.8	5.95	4.993	147.2	0.4437	88.87	29.49	331.8	12.4	203.3	8.38	2.1	0.5	3	0.3	34.7	8.1	50.4	1	5.8	1	4	39.1	0.96	93.6	54.1	40.2	68.6
[truncated: 2 more columns]
