# Supplementary material for: Multiomics Picture of Obesity in Young Adults
Source: Biology (Basel). 2024 Apr 18;13(4):272. doi: 10.3390/biology13040272 (PMC11048234; doi:10.3390/biology13040272)
Supplement: Supplementary file 1 [file biology-13-00272-s001.zip › Table S2.xlsx]

## Sheet: Лист1
Genes included in the sparse models
SYMBOL	ENTREZID	selected_snps	total_snps	fraction_cvrun_sPLS_selected
SAMD11	148398	1	2	0.33
NOC2L	26155	1	3	0.0333333
PLEKHN1	84069	1	1	0.09
AGRN	375790	2	4	0.1575
TTLL10	254173	1	2	0.01
SDF4	51150	1	2	0.005
TMEM88B	643965	1	1	0.99
VWA1	64856	1	1	0.04
ATAD3C	219293	1	1	0.01
ATAD3A	55210	1	3	0.00333333
SSU72	29101	1	1	0.02
MIB2	142678	1	2	0.015
SLC35E2B	728661	1	2	0.41
NADK	65220	3	3	0.153333
CALML6	163688	1	1	0.7
GABRD	2563	1	1	0.16
PRKCZ	5590	1	14	0.00285714
SKI	6497	5	15	0.0693333
MORN1	79906	5	7	0.0371429
PEX10	5192	1	1	0.01
PLCH2	9651	1	2	0.03
TNFRSF14	8764	1	1	0.39
MMEL1	79258	2	2	0.295
PRDM16	63976	29	68	0.0997059
MEGF6	1953	4	17	0.0694118
WRAP73	49856	1	1	0.01
TP73	7161	6	13	0.2
CEP104	9731	1	4	0.0175
DFFB	1677	1	3	0.0566667
AJAP1	55966	11	28	0.0707143
NPHP4	261734	3	12	0.0325
KCNAB2	8514	3	11	0.0190909
CHD5	26038	2	11	0.00181818
ACOT7	11332	2	9	0.00666667
HES2	54626	1	2	0.05
TNFRSF25	8718	1	1	0.07
PLEKHG5	57449	5	9	0.0311111
TAS1R1	80835	1	3	0.0233333
DNAJC11	55735	1	3	0.00333333
CAMTA1	23261	34	98	0.0720408
VAMP3	9341	3	3	0.156667
PER3	8863	4	10	0.244
UTS2	10911	2	3	0.01
RERE	473	7	13	0.296154
CA6	765	3	5	0.198
SLC2A7	155184	2	6	0.0283333
SLC2A5	6518	2	4	0.0175
SPSB1	80176	10	30	0.0413333
PIK3CD	5293	1	3	0.00333333
CTNNBIP1	56998	1	1	0.01
UBE4B	10277	2	4	0.005
PEX14	5195	6	13	0.233077
CASZ1	54897	7	23	0.0830435
C1orf127	148345	6	8	0.32625
MTOR	2475	3	8	0.015
DISP3	57540	2	2	0.79
FBXO44	93611	1	1	0.03
MAD2L2	10459	1	4	0.005
DRAXIN	374946	5	6	0.323333
AGTRAP	57085	1	2	0.005
C1orf167	284498	2	2	0.015
MTHFR	4524	1	5	0.006
PLOD1	5351	1	3	0.00666667
TNFRSF8	943	8	14	0.100714
TNFRSF1B	7133	3	7	0.0185714
VPS13D	55187	3	7	0.0342857
DHRS3	9249	9	15	0.198
AADACL3	126767	1	3	0.0133333
PRAMEF1	65121	1	1	0.01
LRRC38	126755	7	9	0.336667
PDPN	10630	6	7	0.274286
KAZN	23254	80	181	0.0885635
TMEM51	55092	1	10	0.003
FHAD1	114827	10	15	0.124667
CTRC	11330	1	2	0.005
CELA2A	63036	2	2	0.18
CELA2B	51032	1	2	0.065
CASP9	842	1	1	0.05
DNAJC16	23341	2	2	0.305
AGMAT	79814	1	1	0.18
DDI2	84301	2	4	0.25
PLEKHM2	23207	1	6	0.00166667
ZBTB17	7709	2	2	0.58
HSPB7	27129	1	2	0.02
CLCNKA	1187	1	2	0.045
ARHGEF19	128272	2	3	0.04
NECAP2	55707	1	1	0.02
CROCC	9696	1	6	0.0116667
MFAP2	4237	1	3	0.00666667
ATP13A2	23400	2	2	0.055
SDHB	6390	2	2	0.54
PADI2	11240	2	5	0.07
PADI1	29943	4	11	0.187273
PADI3	51702	3	8	0.24125
PADI4	23569	2	8	0.00375
PADI6	353238	2	3	0.02
RCC2	55920	1	2	0.04
ARHGEF10L	55160	7	22	0.0622727
ACTL8	81569	7	9	0.11
IGSF21	84966	19	52	0.0503846
KLHDC7A	127707	2	4	0.0125
PAX7	5081	6	14	0.162857
TAS1R2	80834	3	9	0.12
ALDH4A1	8659	4	5	0.606
IFFO2	126917	4	9	0.175556
UBR4	23352	2	3	0.14
CAPZB	832	10	19	0.223684
HTR6	3362	1	1	0.01
TMCO4	255104	8	17	0.0935294
PLA2G2A	5320	1	2	0.07
PLA2G5	5322	2	4	0.0075
PLA2G2F	64600	1	3	0.0266667
PLA2G2C	391013	2	3	0.21
VWA5B1	127731	1	3	0.0333333
MUL1	79594	1	1	0.04
CDA	978	10	13	0.256923
DDOST	1650	1	1	0.94
KIF17	57576	1	11	0.0454545
SH2D5	400745	1	1	0.02
EIF4G3	8672	6	10	0.161
ECE1	1889	5	13	0.0946154
ALPL	249	2	8	0.08125
RAP1GAP	5909	2	12	0.0625
LDLRAD2	401944	2	5	0.158
HSPG2	3339	8	15	0.0213333
ZBTB40	9923	2	5	0.066
EPHA8	2046	1	7	0.02
C1QC	714	1	1	0.05
EPHB2	2048	7	24	0.0854167
LUZP1	7798	1	3	0.11
TCEA3	6920	1	4	0.0075
ASAP3	55616	1	6	0.00166667
E2F2	1870	1	1	0.03
ID3	3399	2	5	0.014
FUCA1	2517	1	2	0.005
MYOM3	127294	2	9	0.145556
IL22RA1	58985	1	2	0.145
GRHL3	57822	1	2	0.005
NIPAL3	57185	1	2	0.005
RCAN3	11123	2	3	0.22
NCMAP	400746	1	9	0.00111111
RUNX3	864	1	5	0.014
MAN1C1	57134	2	7	0.0128571
MTFR1L	56181	1	1	0.47
AUNIP	79000	1	1	0.48
PAFAH2	5051	1	2	0.39
PDIK1L	149420	2	3	0.513333
CATSPER4	378807	3	5	0.176
UBXN11	91544	3	6	0.015
ZNF683	257101	3	5	0.034
RPS6KA1	6195	1	3	0.00333333
SYTL1	84958	1	1	0.24
MAP3K6	9064	1	1	0.03
CD164L2	388611	1	1	0.62
WASF2	10163	1	1	0.01
AHDC1	27245	2	3	0.103333
FGR	2268	1	1	0.01
STX12	23673	1	1	0.73
THEMIS2	9473	3	3	0.1
SMPDL3B	27293	2	4	0.1625
EYA3	2140	2	5	0.01
SESN2	83667	1	1	0.22
PHACTR4	65979	1	1	0.08
OPRD1	4985	2	14	0.0192857
EPB41	2035	1	1	0.1
PTPRU	10076	7	10	0.129
LAPTM5	7805	5	6	0.146667
SDC3	9672	3	9	0.0955556
PUM1	9698	1	3	0.0433333
NKAIN1	79570	3	9	0.102222
SERINC2	347735	1	2	0.01
SPOCD1	90853	1	2	0.075
PTP4A2	8073	1	2	0.485
LCK	3932	1	2	0.41
ZBTB8A	653121	2	4	0.04
RBBP4	5928	1	1	0.24
ZNF362	149076	1	1	0.29
PHC2	1912	2	5	0.026
ZSCAN20	7579	3	5	0.052
CSMD2	114784	35	73	0.127808
DLGAP3	58512	3	8	0.02625
ZMYM6	9204	2	4	0.0775
ZMYM4	9202	4	5	0.138
KIAA0319L	79932	2	3	0.143333
PSMB2	5690	3	4	0.09
AGO3	192669	2	3	0.0933333
COL8A2	1296	1	4	0.01
THRAP3	9967	1	2	0.02
STK40	83931	1	1	0.23
LSM10	84967	2	3	0.353333
OSCP1	127700	1	3	0.276667
MRPS15	64960	1	1	0.08
GRIK3	2899	12	28	0.075
GNL2	29889	1	1	0.03
EPHA10	284656	3	9	0.0777778
INPP5B	3633	2	4	0.005
SF3A3	10946	1	3	0.00666667
UTP11	51118	1	2	0.01
RHBDL2	54933	2	5	0.008
MACF1	23499	2	13	0.0669231
HEYL	26508	1	2	0.005
NT5C1A	84618	2	4	0.2525
HPCAL4	51440	1	2	0.08
BMP8B	656	1	1	0.23
TRIT1	54802	1	1	0.05
MFSD2A	84879	1	1	0.1
PPT1	5538	1	4	0.2375
ZMPSTE24	10269	2	4	0.08
COL9A2	1298	3	5	0.258
SMAP2	64744	1	3	0.05
ZFP69B	65243	2	2	0.035
EXO5	64789	2	2	0.01
ZNF684	127396	1	3	0.00333333
RIMS3	9783	2	5	0.01
NFYC	4802	1	2	0.02
KCNQ4	9132	5	10	0.033
SCMH1	22955	1	7	0.00142857
FOXO6	100132074	4	4	0.0625
HIVEP3	59269	14	43	0.0662791
GUCA2B	2981	1	2	0.02
FOXJ3	22887	3	6	0.02
ZMYND12	84217	2	3	0.0166667
CCDC30	728621	1	6	0.00166667
CLDN19	149461	1	2	0.02
ERMAP	114625	2	8	0.0075
SLC2A1	6513	6	6	0.61
PTPRF	5792	1	5	0.01
ST3GAL3	6487	1	3	0.0133333
ARTN	9048	1	1	0.01
IPO13	9670	1	1	0.02
SLC6A9	6536	2	4	0.005
KLF17	128209	4	11	0.0954545
RNF220	55182	14	23	0.213913
PTCH2	8643	2	3	0.04
HECTD3	79654	1	1	0.1
UROD	7389	1	1	0.01
ZSWIM5	57643	1	4	0.005
MUTYH	4595	1	2	0.05
TESK2	10420	2	2	0.24
MMACHC	25974	1	1	0.05
PRDX1	5052	1	2	0.02
CCDC17	149483	1	1	0.03
MAST2	23139	2	7	0.0185714
PIK3R3	8503	2	3	0.09
RAD54L	8438	1	2	0.01
NSUN4	387338	4	6	0.0833333
FAAH	2166	5	8	0.06
MKNK1	8569	1	1	0.09
ATPAF1	64756	1	2	0.085
EFCAB14	9813	1	2	0.13
CYP4B1	1580	6	8	0.1925
CYP4Z2P	163720	1	1	0.02
CYP4A11	1579	1	3	0.00333333
CYP4X1	260293	4	5	0.196
CYP4A22	284541	2	3	0.0266667
CMPK1	51727	5	7	0.685714
FOXD2	2306	1	1	0.03
TRABD2B	388630	13	19	0.196842
SLC5A9	200010	1	2	0.01
SPATA6	54558	1	2	0.215
AGBL4	84871	17	35	0.0774286
ELAVL4	1996	1	4	0.005
FAF1	11124	3	5	0.348
CDKN2C	1031	1	1	0.85
C1orf185	284546	5	8	0.12125
EPS15	2060	4	6	0.025
OSBPL9	114883	1	6	0.0383333
RAB3B	5865	2	5	0.006
ZFYVE9	9372	4	8	0.02125
GPX7	2882	2	3	0.42
COA7	65260	1	1	0.02
ZYG11B	79699	3	7	0.0142857
SLC1A7	6512	1	9	0.0744444
CPT2	1376	2	3	0.18
MAGOH	4116	1	2	0.03
LRP8	7804	5	9	0.222222
GLIS1	148979	5	24	0.0120833
DIO1	1733	1	3	0.02
TCEANC2	127428	1	3	0.00333333
SSBP3	23648	5	18	0.0994444
ACOT11	26027	5	12	0.00916667
PARS2	25973	1	2	0.07
TTC22	55001	1	3	0.00333333
DHCR24	1718	1	4	0.0025
TMEM61	199964	1	1	0.68
BSND	7809	2	2	0.12
PCSK9	255738	3	5	0.048
USP24	23358	1	4	0.0825
PLPP3	8613	7	10	0.244
PRKAA2	5563	1	7	0.00285714
C8A	731	3	4	0.08
C8B	732	4	8	0.15375
DAB1	1600	44	91	0.138462
OMA1	115209	2	9	0.0633333
MYSM1	114803	1	3	0.0166667
FGGY	55277	6	25	0.0588
HOOK1	51361	2	4	0.155
C1orf87	127795	3	6	0.08
NFIA	4774	16	38	0.0910526
L1TD1	54596	2	6	0.111667
KANK4	163782	1	9	0.01
USP1	7398	1	1	0.72
DOCK7	85440	13	14	0.464286
ATG4C	84938	1	5	0.03
ALG6	29929	2	4	0.0075
ITGB3BP	23421	2	2	0.03
EFCAB7	84455	1	2	0.01
PGM1	5236	8	13	0.15
ROR1	4919	13	25	0.1512
UBE2U	148581	5	6	0.0116667
CACHD1	57685	11	20	0.107
RAVER2	55225	1	5	0.002
JAK1	3716	4	7	0.157143
AK4	205	4	6	0.035
DNAJC6	9829	10	15	0.0493333
PDE4B	5142	13	33	0.0584848
SGIP1	84251	2	10	0.082
MIER1	57708	1	1	0.15
SLC35D1	23169	1	2	0.005
C1orf141	400757	2	10	0.004
IL23R	149233	14	23	0.0765217
IL12RB2	3595	3	9	0.204444
GNG12	55970	5	7	0.0757143
WLS	79971	2	5	0.008
RPE65	6121	1	2	0.01
LRRC7	57554	20	34	0.152059
LRRC40	55631	1	2	0.23
SRSF11	9295	2	2	0.955
ANKRD13C	81573	4	4	0.705
CTH	1491	1	2	0.055
PTGER3	5733	12	17	0.234118
ZRANB2	9406	1	1	0.01
NEGR1	257194	15	39	0.0817949
ERICH3	127254	1	1	0.77
SLC44A5	204962	9	21	0.144286
ACADM	34	1	4	0.01
MSH4	4438	1	4	0.005
ST6GALNAC3	256435	25	65	0.0330769
ST6GALNAC5	81849	4	12	0.0908333
AK5	26289	5	18	0.0122222
ZZZ3	26009	1	3	0.0166667
DNAJB4	11080	1	4	0.015
GIPC2	54810	2	5	0.004
PTGFR	5737	3	6	0.055
IFI44L	10964	2	3	0.03
ADGRL4	64123	2	7	0.0157143
ADGRL2	23266	5	10	0.209
TTLL7	79739	3	5	0.024
PRKACB	5567	1	2	0.015
DNASE2B	58511	2	2	0.045
RPF1	80135	1	4	0.0175
SPATA1	100505741	1	1	0.06
CTBS	1486	1	2	0.005
SSX2IP	117178	2	3	0.19
LPAR3	23566	5	13	0.04
MCOLN2	255231	3	8	0.06625
MCOLN3	55283	3	3	0.436667
SYDE2	84144	1	4	0.1275
C1orf52	148423	1	2	0.285
BCL10	8915	1	3	0.0166667
DDAH1	23576	7	25	0.0396
COL24A1	255631	11	31	0.0925806
CLCA2	9635	5	6	0.125
CLCA1	1179	3	9	0.113333
HS2ST1	9653	1	3	0.00666667
LMO4	8543	1	3	0.0133333
GTF2B	2959	1	1	0.01
GBP2	2634	1	1	0.02
GBP5	115362	1	1	0.21
GBP6	163351	2	4	0.02
LRRC8C	84230	1	4	0.005
LRRC8D	55144	6	8	0.32875
ZNF326	284695	2	2	0.9
HFM1	164045	1	3	0.0366667
TGFBR3	7049	15	35	0.105143
BTBD8	284697	1	2	0.005
RPAP2	79871	1	1	0.2
EVI5	7813	4	11	0.00363636
MTF2	22823	1	3	0.0233333
FNBP1L	54874	2	3	0.286667
BCAR3	8412	4	10	0.023
ABCA4	24	17	44	0.0847727
ARHGAP29	9411	3	6	0.22
ABCD3	5825	1	4	0.0125
SLC44A3	126969	6	17	0.104706
CNN3	1266	1	5	0.19
ALG14	199857	3	4	0.125
PTBP2	58155	1	2	0.005
DPYD	1806	13	53	0.0439623
SNX7	51375	4	6	0.0133333
PLPPR5	163404	6	14	0.0771429
PLPPR4	9890	5	6	0.0383333
PALMD	54873	3	6	0.0316667
AGL	178	1	7	0.00142857
SLC35A3	23443	3	3	0.183333
TRMT13	54482	1	1	0.05
DBT	1629	1	3	0.273333
GPR88	54112	1	1	0.01
VCAM1	7412	2	7	0.0642857
SLC30A7	148867	2	3	0.03
OLFM3	118427	13	20	0.086
COL11A1	1301	4	17	0.0141176
AMY2B	280	1	1	0.11
NTNG1	22854	10	25	0.12
VAV3	10451	12	37	0.0364865
SLC25A24	29957	4	6	0.025
PRPF38B	55119	1	1	0.3
FNDC7	163479	4	7	0.0757143
AKNAD1	254268	3	7	0.162857
WDR47	22911	2	2	0.255
TMEM167B	56900	1	1	0.09
CELSR2	1952	5	5	0.01
PSRC1	84722	1	1	0.03
MYBPHL	343263	2	3	0.246667
SORT1	6272	2	3	0.05
GNAI3	2773	2	4	0.08
GNAT2	2780	1	3	0.0433333
AMPD2	271	1	3	0.0866667
GSTM4	2948	2	3	0.0433333
GSTM2	2946	1	3	0.183333
GSTM5	2949	3	3	0.616667
GSTM3	2947	3	5	0.358
SLC6A17	388662	1	4	0.25
KCNC4	3749	1	4	0.01
KCNA2	3737	1	7	0.00142857
CD53	963	3	4	0.0825
LRIF1	55791	1	1	0.04
DENND2D	79961	3	5	0.046
CHI3L2	1117	2	2	0.155
CHIA	27159	2	2	0.04
C1orf162	128346	1	2	0.005
DDX20	11218	1	2	0.01
KCND3	3752	11	28	0.0303571
CTTNBP2NL	55917	1	4	0.0025
WNT2B	7482	4	7	0.188571
ST7L	54879	2	2	0.01
CAPZA1	829	2	4	0.01
MOV10	4343	1	1	0.01
RHOC	389	1	1	0.08
MAGI3	260425	1	5	0.002
DCLRE1B	64858	1	1	0.09
HIPK1	204851	2	2	0.065
SYT6	148281	10	18	0.198889
TRIM33	51592	8	9	0.412222
SYCP1	6847	1	2	0.09
TSHB	7252	1	1	0.01
TSPAN2	10100	4	5	0.17
NGF	4803	4	8	0.17375
VANGL1	81839	2	6	0.0616667
CASQ2	845	1	3	0.00333333
SLC22A15	55356	5	14	0.262857
IGSF3	3321	1	4	0.0025
CD2	914	1	2	0.06
PTGFRN	5738	1	5	0.004
VTCN1	79679	3	7	0.0171429
MAN1A2	10905	2	4	0.3
SPAG17	200162	4	9	0.19
TBX15	6913	3	9	0.06
WARS2	10352	2	3	0.00666667
ZNF697	90874	1	4	0.1075
PHGDH	26227	2	9	0.00333333
HMGCS2	3158	3	5	0.298
ADAM30	11085	2	2	0.045
NOTCH2	4853	2	2	0.2
PDE4DIP	9659	1	3	0.103333
LIX1L	128077	1	3	0.00333333
ITGA10	8515	2	2	0.08
ANKRD35	148741	4	4	0.7125
FMO5	2330	3	3	0.14
CHD1L	9557	1	2	0.015
BCL9	607	4	9	0.27
GJA5	2702	1	3	0.04
OTUD7B	56957	1	3	0.316667
ANP32E	81611	1	1	0.67
RPRD2	23248	1	1	0.72
TARS2	80222	1	1	0.47
ECM1	1893	1	1	0.52
GOLPH3L	55204	1	1	0.24
ARNT	405	2	4	0.235
PSMD4	5710	1	2	0.06
SELENBP1	8991	1	2	0.005
PSMB4	5692	1	2	0.005
POGZ	23126	2	4	0.3225
CGN	57530	3	5	0.05
RORC	6097	2	2	0.79
TCHHL1	126637	1	1	0.01
TCHH	7062	1	1	0.01
CRNN	49860	1	1	0.97
LCE4A	199834	1	1	0.06
KPRP	448834	1	2	0.005
LCE1E	353135	1	1	0.09
SPRR2E	6704	1	1	0.16
PGLYRP3	114771	1	1	0.03
PGLYRP4	57115	1	4	0.0025
S100A9	6280	2	2	0.06
S100A8	6279	1	1	0.29
S100A5	6276	1	1	0.12
S100A2	6273	1	2	0.005
INTS3	65123	2	2	0.28
GATAD2B	57459	1	2	0.03
CRTC2	200186	1	2	0.01
NUP210L	91181	1	4	0.0025
IL6R	3570	7	12	0.145833
TDRD10	126668	1	2	0.015
UBE2Q1	55585	1	1	0.77
CHRNB2	1141	2	4	0.225
ADAR	103	1	5	0.002
KCNN3	3782	26	45	0.142889
PMVK	10654	1	1	0.01
EFNA3	1944	1	1	0.16
MUC1	4582	1	1	0.79
SCAMP3	10067	1	1	0.97
FDPS	2224	1	1	0.29
ASH1L	55870	1	1	0.08
YY1AP1	55249	1	1	0.5
GON4L	54856	1	1	0.03
SYT11	23208	1	1	0.05
RIT1	6016	2	3	0.0633333
ARHGEF2	9181	2	2	0.215
LMNA	4000	2	5	0.016
SMG5	23381	1	1	0.01
IQGAP3	128239	1	3	0.0333333
TTC24	164118	1	2	0.295
BCAN	63827	1	1	0.35
PRCC	5546	2	3	0.0833333
PEAR1	375033	10	17	0.0917647
LRRC71	149499	2	2	0.31
ARHGEF11	9826	1	5	0.062
FCRL3	115352	3	3	0.0233333
FCRL2	79368	2	3	0.0333333
CD1D	912	2	2	0.435
CD1A	909	2	2	0.575
SPTA1	6708	1	7	0.00142857
OR6K3	391114	1	1	0.02
OR6N2	81442	2	3	0.01
MNDA	4332	1	2	0.275
PYHIN1	149628	3	8	0.045
IFI16	3428	1	3	0.0433333
AIM2	9447	1	1	0.84
CADM3	57863	3	5	0.178
ACKR1	2532	1	3	0.00666667
FCER1A	2205	4	7	0.1
CRP	1401	2	2	0.425
IGSF9	57549	2	3	0.04
KCNJ10	3766	1	4	0.0025
ATP1A2	477	1	3	0.00666667
ATP1A4	480	3	7	0.147143
DCAF8	50717	1	1	0.23
COPA	1314	1	1	0.15
NCSTN	23385	1	4	0.215
NHLH1	4807	1	1	0.04
VANGL2	57216	2	2	0.19
SLAMF6	114836	3	3	0.283333
SLAMF1	6504	3	11	0.0236364
CD48	962	2	8	0.07625
LY9	4063	2	2	0.505
CD244	51744	2	2	0.93
ITLN1	55600	2	2	0.11
ITLN2	142683	2	2	0.115
KLHDC9	126823	2	2	0.125
PFDN2	5202	1	1	0.03
NDUFS2	4720	1	1	0.01
PCP4L1	654790	2	3	0.653333
FCGR2A	2212	1	1	0.19
FCRLA	84824	1	4	0.2475
FCRLB	127943	1	2	0.04
ATF6	22926	5	7	0.301429
OLFML2B	25903	5	7	0.0485714
NOS1AP	9722	20	47	0.0344681
SH2D1B	117157	1	3	0.0933333
UHMK1	127933	1	2	0.005
DDR2	4921	1	6	0.005
RGS4	5999	2	2	0.02
RGS5	8490	4	9	0.0255556
NUF2	83540	2	2	0.025
PBX1	5087	13	28	0.168571
LMX1A	4009	5	23	0.113913
RXRG	6258	6	8	0.30625
ALDH9A1	223	6	12	0.0333333
TMCO1	54499	1	5	0.002
FAM78B	149297	1	6	0.00333333
ILDR2	387597	1	2	0.405
MAEL	84944	2	2	0.065
GPA33	10223	2	4	0.4075
POU2F1	5451	3	7	0.0957143
CD247	919	12	19	0.271579
RCSD1	92241	5	18	0.0205556
MPZL1	9019	2	7	0.0657143
ADCY10	55811	1	18	0.000555556
MPC2	25874	1	1	0.23
DCAF6	55827	2	2	0.12
GPR161	23432	1	1	0.09
SFT2D2	375035	1	1	0.97
TBX19	9095	3	6	0.19
DPT	1805	1	5	0.174
ATP1B1	481	1	6	0.00666667
NME7	29922	3	15	0.004
F5	2153	5	19	0.0405263
SELP	6403	3	10	0.107
SCYL3	57147	1	1	0.05
KIFAP3	22920	5	7	0.09
MROH9	80133	6	12	0.1575
FMO3	2328	1	10	0.023
FMO6P	388714	1	5	0.004
FMO2	2327	3	6	0.0283333
FMO1	2326	2	11	0.0127273
PRRC2C	23215	2	3	0.306667
MYOC	4653	1	3	0.0466667
DNM3	26052	11	35	0.0288571
SUCO	51430	1	1	0.02
FASLG	356	1	2	0.08
TNFSF4	7292	3	5	0.23
KLHL20	27252	1	1	0.41
ZBTB37	84614	1	3	0.00333333
RABGAP1L	9910	5	18	0.0277778
TNN	63923	1	11	0.000909091
KIAA0040	9674	1	4	0.0025
TNR	7143	15	35	0.0651429
PAPPA2	60676	10	23	0.026087
ASTN1	460	3	14	0.00285714
BRINP2	57795	1	3	0.143333
SEC16B	89866	6	9	0.07
C1orf220	400798	2	11	0.124545
RALGPS2	55103	1	1	0.03
FAM20B	9917	1	2	0.005
TOR3A	64222	2	3	0.0633333
ABL2	27	2	5	0.204
SOAT1	6646	3	4	0.325
AXDND1	126859	6	13	0.226923
TDRD5	163589	5	6	0.03
FAM163A	148753	8	13	0.256923
TOR1AIP2	163590	1	2	0.065
CEP350	9857	1	3	0.00333333
QSOX1	5768	2	2	0.16
LHX4	89884	9	13	0.195385
ACBD6	84320	3	7	0.02
XPR1	9213	1	2	0.06
KIAA1614	57710	2	5	0.032
STX6	10228	1	5	0.002
IER5	51278	1	1	0.01
CACNA1E	777	12	33	0.0554545
RNASEL	6041	3	4	0.105
RGS8	85397	2	2	0.015
NPL	80896	1	2	0.04
DHX9	1660	1	3	0.0366667
SHCBP1L	81626	2	3	0.27
LAMC1	3915	5	8	0.14625
LAMC2	3918	3	11	0.01
NMNAT2	23057	5	9	0.214444
SMG7	9887	2	2	0.52
NCF2	4688	4	5	0.128
ARPC5	10092	1	1	0.06
RGL1	23179	11	24	0.0841667
COLGALT2	23127	4	18	0.00333333
C1orf21	81563	7	14	0.241429
HMCN1	83872	4	14	0.0707143
TPR	7175	1	1	0.01
PLA2G4A	5321	12	18	0.175556
RGS21	431704	1	3	0.00666667
RGS2	5997	2	2	0.28
UCHL5	51377	2	2	0.51
CDC73	79577	1	2	0.005
KCNT2	343450	5	6	0.141667
CFH	3075	4	10	0.072
CFHR5	81494	1	1	0.54
F13B	2165	1	1	0.12
ASPM	259266	2	3	0.0733333
CRB1	23418	4	11	0.0181818
DENND1B	163486	1	6	0.00166667
C1orf53	388722	1	2	0.01
LHX9	56956	1	2	0.25
PTPRC	5788	8	16	0.17625
NR5A2	2494	7	28	0.0217857
CAMSAP2	23271	1	4	0.0025
KIF21B	23046	1	3	0.00333333
CACNA1S	779	10	15	0.286
TMEM9	252839	2	8	0.0075
IGFN1	91156	3	8	0.02625
PKP1	5317	4	8	0.115
TNNT2	7139	2	4	0.02
LAD1	3898	5	5	0.152
TNNI1	7135	1	3	0.01
PHLDA3	23612	1	1	0.01
NAV1	89796	8	23	0.0608696
SHISA4	149345	1	1	1
LMOD1	25802	3	4	0.0125
TIMM17A	10440	2	3	0.113333
RNPEP	6051	1	3	0.0233333
GPR37L1	9283	1	1	0.14
ARL8A	127829	1	1	0.31
PTPN7	5778	1	3	0.113333
LGR6	59352	3	16	0.03625
SYT2	127833	4	7	0.01
KDM5B	10765	3	3	0.02
KLHL12	59349	2	3	0.0133333
ADIPOR1	51094	3	4	0.33
CYB5R1	51706	1	1	0.86
PPFIA4	8497	4	9	0.0544444
CHI3L1	1116	1	3	0.0133333
CHIT1	1118	3	4	0.1675
FMOD	2331	1	2	0.055
PRELP	5549	1	1	0.55
OPTC	26254	1	2	0.32
ATP2B4	493	5	12	0.111667
SOX13	9580	1	10	0.001
REN	5972	1	3	0.01
KISS1	3814	1	4	0.02
PLEKHA6	22874	3	8	0.07125
PIK3C2B	5287	1	7	0.0142857
MDM4	4194	5	5	0.624
LRRN2	10446	3	7	0.202857
NFASC	23114	6	27	0.0118519
CNTN2	6900	1	7	0.00714286
TMEM81	388730	2	3	0.363333
DSTYK	25778	2	3	0.453333
TMCC2	9911	10	14	0.265714
NUAK2	81788	6	7	0.0414286
KLHDC8A	55220	2	4	0.15
CDK18	5129	4	6	0.106667
SLC45A3	85414	1	4	0.0075
NUCKS1	64710	1	1	0.02
PM20D1	148811	3	5	0.14
SLC26A9	115019	1	5	0.004
AVPR1B	553	1	1	0.1
SRGAP2	23380	4	7	0.238571
IKBKE	9641	2	3	0.0166667
RASSF5	83593	2	5	0.07
EIF2D	1939	1	2	0.03
DYRK3	8444	1	1	0.46
MAPKAPK2	9261	1	4	0.0025
IL19	29949	2	6	0.0116667
PFKFB2	5208	1	3	0.286667
C4BPA	722	1	7	0.00285714
CD55	1604	3	9	0.00888889
CR2	1380	2	3	0.4
CR1	1378	31	32	0.445312
CR1L	1379	5	8	0.12125
CD46	4179	4	5	0.144
CD34	947	3	6	0.0866667
PLXNA2	5362	8	23	0.0695652
LAMB3	3914	3	3	0.166667
IRF6	3664	1	1	0.1
SYT14	255928	2	2	0.125
HHAT	55733	29	51	0.137059
KCNH1	3756	16	29	0.0744828
TRAF5	7188	1	4	0.045
RD3	343035	4	4	0.3325
NEK2	4751	1	2	0.07
PPP2R5A	5525	1	1	0.93
NENF	29937	1	1	0.03
ATF3	467	5	8	0.185
BATF3	55509	3	4	0.39
TATDN3	128387	1	1	0.99
FLVCR1	28982	2	2	0.32
VASH2	79805	1	2	0.01
RPS6KC1	26750	3	3	0.02
SMYD2	56950	4	4	0.4375
PTPN14	5784	8	24	0.0804167
KCNK2	3776	2	7	0.00857143
KCTD3	51133	1	2	0.355
USH2A	7399	24	54	0.0953704
ESRRG	2104	37	81	0.102099
GPATCH2	55105	4	15	0.0173333
SPATA17	128153	11	14	0.112857
TGFB2	7042	1	11	0.00727273
LYPLAL1	127018	1	1	0.01
SLC30A10	55532	1	2	0.015
MARK1	4139	1	1	0.86
DUSP10	11221	3	7	0.23
MIA3	375056	4	12	0.0633333
AIDA	64853	4	6	0.188333
FAM177B	400823	1	1	0.5
DISP1	84976	4	10	0.082
SUSD4	55061	4	10	0.016
CCDC185	164127	3	3	0.02
TP53BP2	7159	1	3	0.01
NVL	4931	1	4	0.0025
CNIH4	29097	1	1	0.04
CNIH3	149111	9	25	0.0904
DNAH14	127602	11	28	0.0475
LBR	3930	1	4	0.045
ENAH	55740	1	4	0.08
EPHX1	2052	7	13	0.0907692
LIN9	286826	2	3	0.253333
PARP1	142	1	3	0.00666667
STUM	375057	5	6	0.0416667
ITPKB	3707	2	6	0.0283333
PSEN2	5664	1	2	0.095
CDC42BPA	8476	2	8	0.02375
SNAP47	116841	1	4	0.045
WNT9A	7483	1	1	0.01
OBSCN	84033	1	11	0.00272727
RNF187	149603	1	2	0.3
RHOU	58480	2	4	0.11
RAB4A	5867	1	1	0.04
NUP133	55746	1	3	0.01
ABCB10	23456	1	1	0.37
GALNT2	2590	23	51	0.103922
PGBD5	79605	7	14	0.308571
COG2	22796	3	5	0.058
AGT	183	1	4	0.01
CAPN9	10753	4	14	0.015
C1orf198	84886	2	3	0.136667
TTC13	79573	2	7	0.0414286
ARV1	64801	1	1	0.01
FAM89A	375061	2	6	0.00333333
TRIM67	440730	2	9	0.0155556
C1orf131	128061	1	1	0.03
GNPAT	8443	1	2	0.005
EGLN1	54583	2	4	0.0725
SIPA1L2	57568	9	29	0.0693103
KCNK1	3775	3	13	0.101538
SLC35F3	148641	11	46	0.0856522
TARBP1	6894	13	18	0.0838889
ARID4B	51742	1	4	0.0075
GNG4	2786	4	17	0.00764706
LYST	1130	5	7	0.257143
NID1	4811	9	13	0.223077
GPR137B	7107	1	5	0.006
EDARADD	128178	5	11	0.08
LGALS8	3964	2	7	0.0385714
HEATR1	55127	1	3	0.00333333
ACTN2	88	6	16	0.126875
MTR	4548	4	8	0.01375
RYR2	6262	49	108	0.120741
CHRM3	1131	17	38	0.0373684
FMN2	56776	21	47	0.0406383
GREM2	64388	7	14	0.104286
RGS7	6000	17	60	0.0938333
KMO	8564	4	12	0.0233333
OPN3	23596	2	5	0.082
WDR64	128025	9	21	0.0561905
EXO1	9156	1	5	0.006
BECN2	441925	1	1	0.09
PLD5	200150	19	46	0.0606522
SDCCAG8	10806	2	12	0.00166667
AKT3	10000	2	11	0.00636364
DESI2	51029	1	4	0.0025
EFCAB2	84288	6	9	0.103333
KIF26B	55083	34	98	0.0794898
SMYD3	64754	38	75	0.126667
CNST	163882	3	4	0.6225
SCCPDH	51097	1	3	0.276667
AHCTF1	25909	1	2	0.395
VN1R5	317705	1	1	0.01
NLRP3	114548	4	11	0.0954545
OR2B11	127623	2	3	0.08
GCSAML	148823	3	5	0.596
OR2G2	81470	1	1	0.06
TRIM58	25893	8	24	0.0645833
OR2W3	343171	2	3	0.0633333
OR2L13	284521	2	6	0.128333
OR2M5	127059	1	1	0.01
OR2M3	127062	1	1	0.02
OR2T4	127074	1	1	0.99
OR2T6	254879	1	1	0.2
SNTG2	54221	18	37	0.196757
TPO	7173	6	18	0.0977778
PXDN	7837	5	13	0.131538
MYT1L	23040	27	57	0.131404
TRAPPC12	51112	6	11	0.157273
RPS7	6201	1	1	0.76
COLEC11	78989	4	9	0.108889
ALLC	55821	5	8	0.3
DCDC2C	728597	11	21	0.12619
CMPK2	129607	1	1	0.15
RSAD2	91543	3	6	0.0433333
RNF144A	9781	8	13	0.0953846
LINC00299	339789	22	36	0.256667
KIDINS220	57498	1	3	0.176667
MBOAT2	129642	3	5	0.08
ASAP2	8853	7	9	0.383333
CPSF3	51692	1	2	0.015
IAH1	285148	1	3	0.0166667
YWHAQ	10971	2	4	0.01
TAF1B	9014	1	5	0.002
GRHL1	29841	6	8	0.215
CYS1	192668	3	3	0.283333
RRM2	6241	1	3	0.213333
HPCAL1	3241	12	28	0.0457143
ODC1	4953	1	2	0.42
NOL10	79954	3	6	0.146667
ATP6V1C2	245973	2	4	0.01
PDIA6	10130	5	8	0.3525
ROCK2	9475	1	4	0.0075
GREB1	9687	3	18	0.0516667
NTSR2	23620	2	4	0.035
LPIN1	23175	4	16	0.01
NBAS	51594	6	10	0.2
DDX1	1653	1	1	0.05
MYCNOS	10408	1	1	0.02
VSNL1	7447	2	4	0.095
SMC6	79677	3	4	0.0425
GEN1	348654	1	1	0.24
KCNS3	3790	3	4	0.42
OSR1	130497	1	1	0.23
TTC32	130502	1	1	0.01
WDR35	57539	1	2	0.25
HS1BP3	64342	4	6	0.116667
APOB	338	6	8	0.45625
TDRD15	100129278	1	2	0.4
KLHL29	114818	16	36	0.0927778
ATAD2B	54454	2	7	0.0114286
UBXN2A	165324	1	1	0.36
ITSN2	50618	1	3	0.09
NCOA1	8648	3	7	0.0985714
CENPO	79172	2	4	0.0375
ADCY3	109	2	11	0.00727273
EFR3B	22979	6	13	0.0123077
POMC	5443	2	3	0.00666667
DNMT3A	1788	4	13	0.0269231
DTNB	1838	7	23	0.0708696
ASXL2	55252	1	3	0.01
KIF3C	3797	1	8	0.00625
GAREM2	150946	1	1	0.02
DRC1	92749	4	9	0.0333333
OTOF	9381	8	16	0.13375
CIB4	130106	3	9	0.158889
SLC35F6	54978	1	1	0.03
PREB	10113	1	1	0.05
SLC5A6	8884	2	2	0.495
CAD	790	1	1	0.04
GTF3C2	2976	1	1	0.99
PPM1G	5496	1	1	0.01
IFT172	26160	2	2	0.87
GCKR	2646	1	4	0.025
MRPL33	9553	2	2	0.335
RBKS	64080	3	4	0.4275
FOSL2	2355	4	4	0.26
PLB1	151056	14	30	0.187
PPP1CB	5500	1	1	0.23
SPDYA	245711	2	2	0.51
WDR43	23160	2	2	0.115
CLIP4	79745	9	20	0.043
ALK	238	43	84	0.127738
LBH	81606	5	7	0.495714
LCLAT1	253558	3	10	0.007
CAPN13	92291	10	23	0.202609
GALNT14	79623	11	38	0.0357895
CAPN14	440854	7	11	0.208182
EHD3	30845	5	8	0.045
XDH	7498	9	15	0.194
SRD5A2	6716	1	2	0.015
MEMO1	51072	1	1	0.57
SPAST	6683	1	2	0.005
BIRC6	57448	1	2	0.015
TTC27	55622	5	9	0.153333
LTBP1	4052	16	46	0.098913
RASGRP3	25780	11	27	0.156296
CRIM1	51232	16	24	0.129167
FEZ2	9637	1	1	0.04
VIT	5212	12	20	0.086
STRN	6801	1	1	0.01
HEATR5B	54497	5	9	0.132222
EIF2AK2	5610	4	4	0.4025
CEBPZ	10153	1	2	0.115
NDUFAF7	55471	2	2	0.2
PRKD3	23683	1	2	0.135
QPCT	25797	3	7	0.151429
CDC42EP3	10602	3	4	0.215
RMDN2	151393	8	9	0.221111
CYP1B1	1545	5	9	0.15
ATL2	64225	1	1	0.36
HNRNPLL	92906	1	3	0.00333333
GALM	130589	5	7	0.0742857
DHX57	90957	1	1	0.03
ARHGEF33	100271715	2	3	0.0233333
SOS1	6654	3	4	0.0225
MAP4K3	8491	3	10	0.049
TMEM178A	130733	2	3	0.243333
THUMPD2	80745	1	2	0.01
SLC8A1	6546	14	29	0.111379
EML4	27436	4	9	0.162222
KCNG3	170850	1	3	0.0833333
MTA3	57504	4	12	0.0825
HAAO	23498	1	3	0.0133333
THADA	63892	6	19	0.0126316
PLEKHH2	130271	2	12	0.00166667
ABCG8	64241	4	10	0.096
LRPPRC	10128	2	12	0.00166667
PPM1B	5495	2	5	0.246
SLC3A1	6519	1	1	0.11
PREPL	9581	1	1	0.02
CAMKMT	79823	13	27	0.138889
SRBD1	55133	2	9	0.00333333
PRKCE	5581	58	104	0.150673
EPAS1	2034	2	18	0.0433333
RHOQ	23433	1	2	0.01
MCFD2	90411	2	2	0.185
TTC7A	57217	19	28	0.230357
CALM2	805	1	2	0.005
EPCAM	4072	4	4	0.8075
KCNK12	56660	4	8	0.04875
FOXN2	3344	2	4	0.15
PPP1R21	129285	2	3	0.52
FSHR	2492	3	21	0.0152381
NRXN1	9378	60	113	0.131062
PSME4	23198	1	3	0.02
ACYP2	98	5	16	0.165625
C2orf73	129852	2	3	0.0233333
SPTBN1	6711	9	15	0.106667
EML6	400954	11	38	0.0876316
RTN4	57142	7	13	0.172308
CLHC1	130162	2	5	0.02
CCDC88A	55704	2	4	0.25
PNPT1	87178	4	7	0.0171429
EFEMP1	2202	1	14	0.00142857
CCDC85A	114800	23	45	0.0873333
VRK2	7444	1	3	0.206667
FANCL	55120	3	5	0.264
BCL11A	53335	6	21	0.0461905
PUS10	150962	5	9	0.2
C2orf74	339804	1	1	0.99
USP34	9736	6	6	0.205
XPO1	7514	1	2	0.24
CCT4	10575	1	2	0.025
COMMD1	150684	2	5	0.032
TMEM17	200728	2	3	0.02
EHBP1	23301	2	6	0.00666667
WDPCP	51057	5	13	0.0869231
VPS54	51542	1	4	0.0175
PELI1	57162	1	6	0.00833333
AFTPH	54812	1	3	0.313333
SERTAD2	9792	3	5	0.392
SLC1A4	6509	6	8	0.22875
CEP68	23177	3	5	0.144
RAB1A	5861	1	2	0.44
ACTR2	10097	1	2	0.15
SPRED2	200734	7	10	0.202
MEIS1	4211	13	18	0.255556
ETAA1	54465	4	4	0.3875
PPP3R1	5534	2	3	0.0133333
CNRIP1	25927	1	5	0.004
PLEK	5341	2	5	0.012
APLF	200558	3	4	0.285
PROKR1	10887	1	3	0.0833333
ARHGAP25	9938	10	21	0.0585714
BMP10	27302	2	2	0.01
GKN2	200504	1	2	0.035
GKN1	56287	1	1	0.23
ANTXR1	84168	4	21	0.0047619
AAK1	22848	3	10	0.167
ANXA4	307	6	12	0.0616667
ASPRV1	151516	1	1	0.02
FAM136A	84908	1	1	0.18
TGFA	7039	4	10	0.117
ADD2	119	3	11	0.0118182
CLEC4F	165530	1	2	0.005
CD207	50489	3	5	0.022
VAX2	25806	3	6	0.215
ATP6V1B1	525	3	4	0.4725
ANKRD53	79998	1	2	0.035
TEX261	113419	1	1	0.04
MCEE	84693	1	2	0.01
PAIP2B	400961	1	2	0.19
ZNF638	27332	3	7	0.00571429
DYSF	8291	11	33	0.0130303
EXOC6B	23233	13	18	0.274444
EGR4	1961	1	1	0.48
ALMS1	7840	10	20	0.034
ACTG2	72	2	2	0.54
DGUOK	1716	1	2	0.01
TET3	200424	2	6	0.0116667
MOB1A	55233	1	1	0.01
SLC4A5	57835	5	10	0.042
M1AP	130951	1	1	0.02
SEMA4F	10505	1	2	0.005
HK2	3099	6	14	0.185
TACR1	6869	4	23	0.0130435
EVA1A	84141	1	7	0.0657143
MRPL19	9801	1	1	0.46
GCFC2	6936	2	4	0.03
LRRTM4	80059	39	83	0.0751807
REG1A	5967	1	2	0.265
CTNNA2	1496	55	132	0.0952273
DNAH6	1768	14	15	0.721333
TRABD2A	129293	9	11	0.613636
KCMF1	56888	2	2	0.53
TCF7L1	83439	13	27	0.106667
TGOLN2	10618	1	3	0.02
ELMOD3	84173	4	4	0.3375
VAMP5	10791	2	2	0.32
SFTPB	6439	1	2	0.095
ATOH8	84913	5	8	0.2225
ST3GAL5	8869	1	2	0.465
POLR1A	25885	3	3	0.246667
PTCD3	55037	1	1	0.87
MRPL35	51318	2	2	0.445
REEP1	65055	5	7	0.402857
KDM3A	55818	1	2	0.5
RMND5A	64795	4	4	0.695
CD8B	926	2	2	0.315
SMYD1	150572	5	7	0.0214286
FABP1	2168	1	1	0.18
RPIA	22934	2	3	0.106667
KCNIP3	30818	1	3	0.04
ANKRD36C	400986	1	1	0.64
DUSP2	1844	1	1	0.02
FAM178B	51252	3	7	0.0114286
VWA3B	200403	3	9	0.0477778
CNGA3	1261	1	8	0.00125
INPP4A	3631	2	5	0.022
MGAT4A	11320	3	6	0.00666667
TSGA10	80705	1	2	0.31
REV1	51455	3	8	0.05625
AFF3	3899	7	20	0.073
LONRF2	164832	1	3	0.0666667
PDCL3	79031	2	2	0.075
NPAS2	4862	6	23	0.0186957
RPL31	6160	1	1	0.1
TBC1D8	11138	1	7	0.00428571
CREG2	200407	2	5	0.048
MAP4K4	9448	1	1	0.52
IL1R2	7850	3	3	0.146667
IL1R1	3554	7	12	0.151667
IL1RL2	8808	1	6	0.00333333
IL1RL1	9173	2	8	0.0175
IL18R1	8809	5	6	0.0633333
IL18RAP	8807	4	4	0.2675
SLC9A4	389015	5	6	0.246667
SLC9A2	6549	3	8	0.005
MFSD9	84804	1	1	0.02
TMEM182	130827	2	7	0.15
TGFBRAP1	9392	2	8	0.1125
FHL2	2274	1	14	0.0257143
NCK2	8440	9	21	0.142381
ST6GAL2	84620	8	10	0.197
SLC5A7	60482	3	6	0.118333
SULT1C2	6819	1	5	0.012
LIMS1	3987	2	7	0.0285714
EDAR	10913	1	12	0.000833333
MALL	7851	1	1	0.07
ACOXL	55289	10	28	0.1525
MERTK	10461	4	8	0.00875
TMEM87B	84910	2	4	0.2625
FBLN7	129804	2	5	0.068
ZC3H6	376940	1	4	0.015
TTL	150465	1	1	0.93
POLR1B	84172	1	2	0.135
IL36B	27177	2	2	0.05
IL1F10	84639	1	1	0.06
SLC35F5	80255	1	4	0.03
ACTR3	10096	1	2	0.03
DPP10	57628	32	77	0.0750649
CCDC93	54520	2	3	0.0933333
INSIG2	51141	5	5	0.132
MARCO	8685	1	7	0.00142857
STEAP3	55240	1	3	0.0233333
C2orf76	130355	3	4	0.0575
SCTR	6344	1	5	0.01
CFAP221	200373	4	6	0.203333
PTPN4	5775	2	4	0.0175
EPB41L5	57669	1	3	0.333333
RALB	5899	3	5	0.254
GLI2	2736	11	18	0.294444
TFCP2L1	29842	1	2	0.03
CLASP1	23332	6	7	0.375714
CNTNAP5	129684	19	58	0.0451724
GYPC	2995	12	40	0.01325
CYP27C1	339761	1	2	0.035
ERCC3	2071	1	2	0.24
MAP3K2	10746	1	1	0.2
PROC	5624	5	5	0.288
IWS1	55677	1	1	0.07
MYO7B	4648	7	12	0.0833333
LIMS2	55679	2	5	0.086
WDR33	55339	2	4	0.0675
AMMECR1L	83607	1	1	0.03
UGGT1	56886	2	3	0.186667
HS6ST1	9394	4	8	0.01625
SMPD4	55627	1	1	0.1
PTPN18	26469	1	2	0.005
ARHGEF4	50649	7	21	0.0633333
FAM168B	130074	1	1	0.99
ANKRD30BL	554226	1	1	0.07
GPR39	2863	16	28	0.242143
NCKAP5	344148	24	83	0.0353012
MGAT5	4249	11	54	0.0190741
TMEM163	81615	4	15	0.0946667
ACMSD	130013	1	3	0.00666667
CCNT2	905	1	2	0.005
MAP3K19	80122	3	3	0.0433333
RAB3GAP1	22930	5	5	0.374
ZRANB3	84083	4	6	0.166667
R3HDM1	23518	1	8	0.05125
MCM6	4175	1	1	0.07
CXCR4	7852	1	1	0.09
THSD7B	80731	26	62	0.056129
HNMT	3176	4	4	0.17
SPOPL	339745	1	3	0.0333333
NXPH2	11249	3	11	0.123636
LRP1B	53353	70	164	0.0992683
KYNU	8942	4	15	0.136667
ARHGAP15	55843	19	44	0.145227
GTDC1	79712	10	13	0.466923
ZEB2	9839	8	14	0.0935714
ORC4	5000	2	2	0.11
MBD5	55777	13	22	0.105
KIF5C	3800	2	5	0.012
LYPD6B	130576	5	9	0.0266667
LYPD6	130574	4	12	0.0491667
MMADHC	27249	1	1	0.04
RND3	390	1	5	0.008
NMI	9111	1	2	0.005
RIF1	55183	2	3	0.00666667
NEB	4703	3	5	0.122
CACNB4	785	11	25	0.052
STAM2	10254	1	4	0.0375
FMNL2	114793	12	35	0.0314286
PRPF40A	55660	2	2	0.23
ARL6IP6	151188	1	1	0.24
GALNT13	114805	19	42	0.165714
KCNJ3	3760	6	18	0.0683333
GPD2	2820	3	10	0.009
ACVR1C	130399	3	5	0.378
ACVR1	90	2	4	0.3125
UPP2	151531	3	18	0.0327778
CCDC148	130940	5	13	0.0846154
PKP4	8502	2	9	0.00333333
DAPL1	92196	2	3	0.496667
TANC1	85461	10	16	0.379375
WDSUB1	151525	1	2	0.01
BAZ2B	29994	10	22	0.261818
PLA2R1	22925	9	14	0.213571
ITGB6	3694	7	14	0.123571
RBMS1	5937	6	12	0.1225
SLC4A10	57282	2	8	0.0125
DPP4	1803	6	9	0.0188889
KCNH7	90134	8	22	0.0972727
FIGN	55137	3	13	0.0123077
GRB14	2888	3	10	0.003
COBLL1	22837	14	16	0.62375
SCN3A	6328	1	1	0.05
SCN2A	6326	3	13	0.0630769
CSRNP3	80034	5	13	0.0284615
GALNT3	2591	1	1	0.26
TTC21B	79809	3	3	0.266667
SCN1A	6323	4	5	0.156
SCN9A	6335	3	5	0.134
SCN7A	6332	3	6	0.01
XIRP2	129446	5	18	0.0533333
B3GALT1	8708	13	31	0.0667742
STK39	27347	4	20	0.016
CERS6	253782	12	24	0.0458333
NOSTRIN	115677	6	10	0.299
SPC25	57405	2	3	0.18
G6PC2	57818	2	3	0.01
ABCB11	8647	26	32	0.158438
DHRS9	10170	3	4	0.485
LRP2	4036	8	23	0.126522
BBS5	129880	1	2	0.015
PPIG	9360	2	3	0.38
METTL5	29081	1	2	0.03
UBR3	130507	5	7	0.23
MYO3B	140469	27	66	0.065
GAD1	2571	1	4	0.0025
GORASP2	26003	1	2	0.025
METTL8	79828	2	2	0.26
DCAF17	80067	1	1	0.8
CYBRD1	79901	3	6	0.181667
SLC25A12	8604	3	3	0.513333
HAT1	8520	2	2	0.025
METAP1D	254042	3	4	0.4325
ITGA6	3655	4	10	0.055
PDK1	5163	4	5	0.728
RAPGEF4	11069	8	24	0.0654167
CDCA7	83879	3	3	0.206667
SP3	6670	1	2	0.015
OLA1	29789	2	8	0.01375
SP9	100131390	2	3	0.0166667
CIR1	9541	2	3	0.29
SCRN3	79634	3	4	0.1025
GPR155	151556	2	4	0.0175
WIPF1	7456	4	8	0.10625
CHRNA1	1134	1	1	0.01
CHN1	1123	1	5	0.028
HOXD13	3239	1	2	0.04
HOXD11	3237	2	2	0.17
HOXD10	3236	1	2	0.075
MTX2	10651	1	2	0.035
NFE2L2	4780	4	5	0.558
PDE11A	50940	5	26	0.0115385
OSBPL6	114880	7	13	0.263077
TTN	7273	12	18	0.240556
CCDC141	285025	6	18	0.0122222
SESTD1	91404	3	6	0.005
ZNF385B	151126	23	43	0.183721
ITGA4	3676	2	11	0.00545455
CERKL	375298	4	8	0.01375
PPP1R1C	151242	5	12	0.0375
PDE1A	5136	13	37	0.0921622
DNAJC10	54431	3	3	0.35
FRZB	2487	1	6	0.0166667
NCKAP1	10787	4	6	0.343333
ZNF804A	91752	4	16	0.02375
FSIP2	401024	3	4	0.1725
FAM171B	165215	1	2	0.02
ZSWIM2	151112	1	2	0.005
CALCRL	10203	1	4	0.04
GULP1	51454	3	9	0.217778
DIRC1	116093	2	3	0.11
COL3A1	1281	2	4	0.2525
COL5A2	1290	2	3	0.06
SLC40A1	30061	2	7	0.12
ANKAR	150709	1	3	0.00333333
PMS1	5378	1	1	0.11
C2orf88	84281	11	21	0.08
HIBCH	26275	2	3	0.00666667
MFSD6	54842	2	3	0.0133333
NAB1	4664	2	3	0.13
GLS	2744	2	4	0.0475
STAT1	6772	4	8	0.065
STAT4	6775	9	15	0.276
MYO1B	4430	1	5	0.184
TMEFF2	23671	5	11	0.256364
SLC39A10	57181	1	6	0.00333333
DNAH7	56171	3	10	0.035
STK17B	9262	1	1	0.01
HECW2	57520	11	33	0.0333333
CCDC150	284992	4	4	0.09
GTF3C3	9330	1	1	0.02
ANKRD44	91526	6	15	0.206
SF3B1	23451	1	1	1
RFTN2	130132	3	3	0.506667
BOLL	66037	1	1	0.05
PLCL1	5334	10	16	0.266875
SATB2	23314	3	8	0.10625
FTCDNL1	348751	3	8	0.22125
C2orf69	205327	1	1	0.02
TYW5	129450	1	1	0.01
SPATS2L	26010	5	8	0.11
AOX1	316	3	7	0.02
CASP8	841	7	9	0.0577778
TMEM237	65062	1	2	0.03
MPP4	58538	5	11	0.0527273
ALS2	57679	2	2	0.08
KIAA2012	100652824	3	5	0.158
SUMO1	7341	1	1	0.09
FAM117B	150864	2	6	0.00666667
RAPH1	65059	1	2	0.21
CD28	940	2	4	0.065
ICOS	29851	1	2	0.03
PARD3B	117583	38	78	0.130641
NRP2	8828	7	14	0.112143
ZDBF2	57683	1	5	0.026
ADAM23	8745	12	14	0.438571
DYTN	391475	4	8	0.0425
CPO	130749	4	4	0.2525
KLF7	8609	4	9	0.0277778
CREB1	1385	4	5	0.104
PLEKHM3	389072	3	6	0.16
CRYGA	1418	1	2	0.06
C2orf80	389073	7	15	0.168667
IDH1	3417	1	1	0.09
PIKFYVE	200576	2	7	0.01
PTH2R	5746	8	12	0.15
UNC80	285175	2	5	0.008
RPE	6120	1	2	0.455
KANSL1L	151050	1	1	0.12
CPS1	1373	7	13	0.0669231
ERBB4	2066	44	103	0.109417
IKZF2	22807	3	10	0.033
SPAG16	79582	26	59	0.0788136
VWC2L	402117	3	4	0.2175
BARD1	580	1	10	0.001
ABCA12	26154	6	8	0.23125
ATIC	471	2	9	0.00444444
FN1	2335	1	6	0.00166667
MREG	55686	4	13	0.00461538
XRCC5	7520	6	10	0.209
SMARCAL1	50485	1	3	0.02
IGFBP2	3485	1	1	0.03
IGFBP5	3488	2	2	0.025
TNS1	7145	12	22	0.0777273
USP37	57695	2	2	0.02
PLCD4	84812	1	1	0.02
TTLL4	9654	1	2	0.01
PRKAG3	53632	1	1	0.01
IHH	3549	1	1	0.8
SLC23A3	151295	1	2	0.105
ABCB6	10058	1	1	0.05
ATG9A	79065	2	2	0.035
PTPRN	5798	1	1	0.08
DNPEP	23549	1	1	0.01
SPEG	10290	4	8	0.20125
GMPPA	29926	1	1	0.02
ASIC4	55515	1	2	0.5
OBSL1	23363	1	2	0.48
SLC4A3	6508	1	1	0.01
EPHA4	2043	12	15	0.312667
PAX3	5077	2	9	0.0777778
CCDC140	151278	1	1	0.26
SGPP2	130367	4	14	0.04
MOGAT1	116255	2	12	0.01
ACSL3	2181	1	8	0.01
KCNE4	23704	2	6	0.01
AP1S3	130340	3	9	0.148889
WDFY1	57590	3	6	0.116667
SERPINE2	5270	4	13	0.163846
FAM124B	79843	2	5	0.096
CUL3	8452	2	4	0.055
DOCK10	55619	9	24	0.12375
NYAP2	57624	1	11	0.000909091
IRS1	3667	6	6	0.715
RHBDD1	84236	4	8	0.02875
COL4A4	1286	11	14	0.259286
COL4A3	1285	5	10	0.136
MFF	56947	4	9	0.148889
TM4SF20	79853	5	7	0.31
AGFG1	3267	2	3	0.333333
C2orf83	56918	2	5	0.132
SLC19A3	80704	2	6	0.00833333
DAW1	164781	3	4	0.2625
SPHKAP	80309	7	13	0.0161538
PID1	55022	11	28	0.163214
DNER	92737	13	37	0.0805405
SLC16A14	151473	1	3	0.0133333
SP110	3431	5	9	0.272222
SP140	11262	2	6	0.00833333
SP140L	93349	2	10	0.095
SP100	6672	1	6	0.00166667
CAB39	51719	1	6	0.108333
ITM2C	81618	1	4	0.0075
SPATA3	130560	2	3	0.09
ARMC9	80210	3	7	0.3
PDE6D	5147	1	2	0.005
DIS3L2	129563	15	20	0.0765
ALPI	248	1	1	0.01
ECEL1	9427	1	2	0.005
PRSS56	646960	2	3	0.203333
CHRNG	1146	2	2	0.12
EIF4E2	9470	1	4	0.115
EFHD1	80303	1	4	0.0075
GIGYF2	26058	2	5	0.024
NGEF	25791	10	19	0.208947
ATG16L1	55054	4	5	0.052
SAG	6295	3	4	0.1
DGKD	8527	1	13	0.000769231
USP40	55230	1	1	0.81
UGT1A8	54576	7	8	0.0975
MROH2A	339766	14	20	0.2355
HJURP	55355	3	9	0.00333333
TRPM8	79054	13	31	0.0987097
SPP2	6694	3	5	0.202
SH3BP4	23677	8	13	0.0938462
AGAP1	116987	16	50	0.0734
ASB18	401036	4	7	0.0685714
IQCA1	79781	1	7	0.00142857
COL6A3	1293	4	11	0.269091
MLPH	79083	6	13	0.106154
LRRFIP1	9208	9	21	0.131429
RBM44	375316	2	3	0.0266667
RAMP1	10267	5	15	0.0206667
KLHL30	377007	2	2	0.365
PER2	8864	2	4	0.2225
TRAF3IP1	26146	1	4	0.06
ASB1	51665	1	1	0.1
TWIST2	117581	1	6	0.01
HDAC4	9759	7	45	0.05
NDUFA10	4705	3	7	0.131429
GPC1	2817	2	4	0.065
ANKMY1	51281	3	10	0.006
RNPEPL1	57140	2	2	0.04
GPR35	2859	1	6	0.0916667
KIF1A	547	2	9	0.00777778
AGXT	189	1	3	0.0966667
SNED1	25992	3	12	0.0116667
PASK	23178	4	6	0.233333
FARP2	9855	5	7	0.07
BOK	666	2	4	0.385
ATG4B	23192	2	3	0.64
D2HGDH	728294	2	6	0.025
PDCD1	5133	1	1	0.01
CHL1	10752	10	32	0.0640625
CNTN6	27255	17	55	0.086
CNTN4	152330	72	186	0.0839247
IL5RA	3568	6	13	0.0961538
TRNT1	51095	1	2	0.035
CRBN	51185	1	4	0.18
SUMF1	285362	5	15	0.00666667
ITPR1	3708	31	71	0.10493
ARL8B	55207	3	5	0.174
EDEM1	9695	1	3	0.0966667
GRM7	2917	50	103	0.159029
LMCD1	29995	4	6	0.125
LINC00312	29931	1	1	0.02
SSUH2	51066	8	16	0.229375
OXTR	5021	3	12	0.0375
RAD18	56852	3	5	0.084
SRGAP3	9901	20	49	0.0981633
SETD5	55209	1	4	0.0275
LHFPL4	375323	2	7	0.04
CPNE9	151835	1	4	0.0025
IL17RC	84818	1	3	0.05
CRELD1	78987	1	1	0.5
VHL	7428	3	3	0.88
IRAK2	3656	5	8	0.205
TATDN2	9797	1	5	0.004
SEC13	6396	2	2	0.75
ATP2B2	491	28	55	0.11
SLC6A11	6538	4	18	0.08
SLC6A1	6529	5	11	0.187273
HRH1	3269	2	6	0.085
ATG7	10533	4	9	0.0488889
VGLL4	9686	14	29	0.1
TAMM41	132001	1	3	0.07
SYN2	6854	2	8	0.00625
PPARG	5468	9	23	0.0617391
TMEM40	55287	1	2	0.055
IQSEC1	9922	13	26	0.0569231
NUP210	23225	1	2	0.01
HDAC11	79885	2	3	0.56
FBLN2	2199	8	24	0.0583333
WNT7A	7476	5	10	0.18
CHCHD4	131474	1	1	0.01
TMEM43	79188	1	2	0.03
XPC	7508	1	2	0.025
LSM3	27258	1	1	0.08
SLC6A6	6533	15	30	0.103
GRIP2	80852	2	6	0.0233333
CCDC174	51244	2	3	0.63
C3orf20	84077	4	10	0.044
FGD5	152273	7	10	0.38
SH3BP5	9467	3	15	0.094
METTL6	131965	1	3	0.0233333
COLQ	8292	5	7	0.217143
BTD	686	2	5	0.2
ANKRD28	23243	2	3	0.666667
GALNT15	117248	5	17	0.0494118
RFTN1	23180	13	28	0.0496429
DAZL	1618	3	4	0.0325
PLCL2	23228	1	8	0.00125
TBC1D5	9779	10	16	0.468125
SATB1	6304	4	9	0.181111
KCNH8	131096	8	19	0.198947
EFHB	151651	4	9	0.238889
RAB5A	5868	2	2	0.12
PP2D1	151649	1	1	0.73
KAT2B	8850	10	16	0.19
SGO1	151648	1	1	0.02
ZNF385D	79750	68	161	0.0803106
UBE2E2	7325	10	16	0.2925
UBE2E1	7324	1	3	0.02
NR1D2	9975	1	4	0.0025
THRB	7068	17	31	0.121613
RARB	5915	23	59	0.0923729
TOP2B	7155	3	4	0.0475
NGLY1	55768	1	1	0.02
NEK10	152110	6	11	0.134545
SLC4A7	9497	3	5	0.13
CMC1	152100	1	2	0.375
ZCWPW2	152098	2	4	0.005
RBMS3	27303	30	84	0.0686905
TGFBR2	7048	10	26	0.0780769
GADL1	339896	13	27	0.0462963
STT3B	201595	2	3	0.0966667
OSBPL10	114884	15	46	0.0628261
GPD1L	23171	2	5	0.056
CMTM8	152189	15	32	0.0409375
CMTM7	112616	6	10	0.21
CMTM6	54918	1	2	0.01
DYNC1LI1	51143	2	3	0.0533333
TRIM71	131405	4	6	0.118333
CRTAP	10491	1	2	0.03
CLASP2	23122	4	6	0.151667
PDCD6IP	10015	1	3	0.02
ARPP21	10777	2	10	0.038
STAC	6769	9	16	0.04625
TRANK1	9881	5	6	0.186667
ITGA9	3680	13	31	0.0351613
CTDSPL	10217	4	5	0.284
DLEC1	9940	2	5	0.008
SLC22A14	9389	5	15	0.052
XYLB	9942	3	6	0.00666667
SCN5A	6331	11	27	0.0825926
SCN10A	6336	20	23	0.716957
SCN11A	11280	1	3	0.296667
CX3CR1	1524	3	5	0.08
MOBP	4336	1	6	0.0216667
MYRIP	25924	25	33	0.207273
ZNF621	285268	1	1	0.01
CTNNB1	1499	2	3	0.133333
ULK4	54986	24	46	0.116522
TRAK1	22906	13	16	0.333125
VIPR1	7433	1	5	0.002
ZBTB47	92999	1	1	0.1
KLHL40	131377	1	2	0.01
HHATL	57467	1	1	0.01
ACKR2	1238	4	5	0.014
POMGNT2	84892	2	3	0.0633333
ANO10	55129	1	5	0.044
TOPAZ1	375337	1	3	0.00333333
KIF15	56992	1	2	0.08
EXOSC7	23016	1	1	0.02
CDCP1	64866	11	25	0.154
LIMD1	8994	3	6	0.0166667
SLC6A20	54716	2	8	0.0025
LZTFL1	54585	1	4	0.025
FYCO1	79443	1	1	0.07
LTF	4057	4	5	0.398
RTP3	83597	1	1	0.02
LRRC2	79442	2	5	0.244
ALS2CL	259173	1	2	0.015
TMIE	259236	1	1	0.26
MYL3	4634	2	2	0.035
PTH1R	5745	3	3	0.186667
CCDC12	151903	1	2	0.095
KLHL18	23276	2	2	0.12
ELP6	54859	1	1	0.16
DHX30	22907	1	1	0.09
MAP4	4134	2	4	0.23
ZNF589	51385	2	2	0.02
SHISA5	51246	1	1	0.18
PFKFB4	5210	2	2	0.075
CELSR3	1951	2	2	0.05
NCKIPSD	51517	1	1	0.01
IP6K2	51447	3	4	0.1225
RHOA	387	1	2	0.135
BSN	8927	1	2	0.005
APEH	327	1	1	0.01
IP6K1	9807	1	2	0.03
CDHR4	389118	1	2	0.09
MON1A	84315	1	1	0.01
SLC38A3	10991	1	1	0.96
CACNA2D2	9254	6	6	0.256667
C3orf18	51161	1	1	0.09
HEMK1	51409	1	1	0.92
MAPKAPK3	7867	1	1	0.38
DOCK3	1795	11	14	0.463571
POC1A	25886	1	2	0.205
SFMBT1	51460	1	1	0.08
RFT1	91869	2	3	0.103333
PRKCD	5580	3	3	0.426667
TKT	7086	1	2	0.13
CACNA1D	776	11	29	0.0541379
CHDH	55349	1	6	0.00166667
IL17RB	55540	1	1	0.2
CACNA2D3	55799	40	133	0.0651128
WNT5A	7474	1	2	0.08
ERC2	26059	19	55	0.0565455
CCDC66	285331	4	4	0.1525
ARHGEF3	50650	18	45	0.119556
IL17RD	54756	2	8	0.02
DNAH12	201625	2	10	0.005
SLMAP	7871	2	9	0.01
FLNB	2317	6	15	0.0846667
DNASE1L3	1776	2	5	0.004
ABHD6	57406	2	3	0.07
PXK	54899	1	4	0.0025
FAM107A	11170	1	6	0.00166667
FAM3D	131177	4	5	0.308
FHIT	2272	86	226	0.0707522
PTPRG	5793	28	78	0.0689744
FEZF2	55079	1	1	0.05
CADPS	8618	21	56	0.09875
SYNPR	132204	6	18	0.158333
SNTN	132203	1	2	0.005
PSMD6	9861	1	1	0.02
PRICKLE2	166336	5	16	0.009375
ADAMTS9	56999	6	15	0.138
MAGI1	9223	34	78	0.0758974
SLC25A26	115286	3	13	0.0861538
LRIG1	26018	6	12	0.1425
SUCLG2	8801	20	36	0.143889
EOGT	285203	2	2	0.03
LMOD3	56203	1	1	0.26
FRMD4B	23150	10	34	0.0770588
MITF	4286	5	10	0.134
FOXP1	27086	15	42	0.0283333
EIF4E3	317649	1	7	0.00142857
PROK2	60675	1	1	0.14
SHQ1	55164	2	5	0.24
GXYLT2	727936	2	9	0.00333333
PDZRN3	23024	6	19	0.0205263
CNTN3	5067	23	36	0.123333
ROBO2	6092	60	144	0.117847
ROBO1	6091	14	56	0.0482143
GBE1	2632	6	10	0.12
CADM2	253559	12	42	0.0445238
VGLL3	389136	1	3	0.00333333
CHMP2B	25978	1	3	0.00333333
HTR1F	3355	2	6	0.138333
CGGBP1	8545	2	2	0.015
EPHA3	2042	10	16	0.154375
PROS1	5627	1	1	0.08
EPHA6	285220	4	21	0.0433333
CRYBG3	131544	2	4	0.01
GABRR3	200959	5	12	0.0141667
OR5AC2	81050	1	2	0.015
OR5K4	403278	1	1	0.01
CLDND1	56650	3	5	0.038
CPOX	1371	3	5	0.036
ST3GAL6	10402	2	2	0.01
DCBLD2	131566	4	4	0.28
COL8A1	1295	4	11	0.0390909
TOMM70	9868	2	3	0.02
LNP1	348801	1	2	0.005
TMEM45A	55076	4	6	0.111667
ABI3BP	25890	12	30	0.101667
IMPG2	50939	1	2	0.01
SENP7	57337	2	5	0.158
PCNP	57092	1	1	0.02
CEP97	79598	1	2	0.005
NXPE3	91775	1	2	0.21
ZPLD1	131368	6	13	0.166923
ALCAM	214	7	12	0.214167
CBLB	868	7	14	0.215
BBX	56987	9	16	0.1425
CD47	961	2	4	0.0225
IFT57	55081	6	7	0.187143
HHLA2	11148	5	8	0.4175
MYH15	22989	4	9	0.135556
DZIP3	9666	1	1	0.02
GUCA1C	9626	2	4	0.04
MORC1	27136	3	11	0.0581818
DPPA2	151871	1	3	0.01
CD96	10225	4	5	0.03
PLCXD2	257068	2	3	0.0833333
PHLDB2	90102	10	14	0.253571
ABHD10	55347	1	2	0.465
TAGLN3	29114	5	9	0.29
TMPRSS7	344805	1	3	0.0166667
GCSAM	257144	2	2	0.37
SLC9C1	285335	5	8	0.34875
CCDC80	151887	1	2	0.005
CD200R1L	344807	1	3	0.00333333
CD200R1	131450	3	6	0.0333333
BOC	91653	3	10	0.019
SIDT1	54847	4	10	0.005
GRAMD1C	54762	5	7	0.277143
ZDHHC23	254887	1	2	0.01
DRD3	1814	7	10	0.477
ZNF80	7634	1	1	0.05
TIGIT	201633	2	3	0.286667
ZBTB20	26137	18	41	0.149024
GAP43	2596	6	11	0.232727
LSAMP	4045	20	56	0.145536
IGSF11	152404	3	8	0.025
UPK1B	7348	2	4	0.03
B4GALT4	8702	2	4	0.11
ARHGAP31	57514	7	12	0.195
TMEM39A	55254	1	1	0.07
TIMMDC1	51300	1	1	0.99
CD80	941	3	9	0.0411111
ADPRH	141	1	1	0.04
COX17	10063	1	1	0.01
NR1I2	8856	7	18	0.110556
GSK3B	2932	5	9	0.01
GPR156	165829	2	4	0.0175
FSTL1	11167	2	5	0.012
HGD	3081	1	7	0.00428571
RABL3	285282	2	3	0.503333
GTF2E1	2960	1	3	0.326667
STXBP5L	9515	3	9	0.0144444
POLQ	10721	3	5	0.082
ARGFX	503582	1	5	0.01
FBXO40	51725	1	2	0.135
HCLS1	3059	1	1	0.95
GOLGB1	2804	3	5	0.25
EAF2	55840	4	5	0.126
SLC15A2	6565	7	19	0.0331579
ILDR1	286676	1	2	0.055
CD86	942	5	10	0.021
CASR	846	7	12	0.176667
CSTA	1475	1	2	0.02
KPNA1	3836	1	1	0.56
DTX3L	151636	1	2	0.065
PARP15	165631	5	9	0.161111
PARP14	54625	1	2	0.065
HSPBAP1	79663	2	3	0.293333
SEMA5B	54437	10	18	0.188889
PDIA5	10954	6	16	0.080625
ADCY5	111	4	16	0.06875
HACD2	201562	1	5	0.002
MYLK	4638	8	16	0.115
CCDC14	64770	2	2	0.045
KALRN	8997	26	62	0.119839
ITGB5	3693	2	6	0.02
MUC13	56667	2	8	0.01875
HEG1	57493	6	15	0.102
SLC12A8	84561	9	20	0.0795
ZNF148	7707	4	6	0.0816667
SNX4	8723	2	3	0.0666667
SLC41A3	54946	3	7	0.00714286
ALDH1L1	10840	2	14	0.00857143
ZXDC	79364	2	2	0.29
UROC1	131669	2	6	0.0366667
C3orf22	152065	1	3	0.00333333
PODXL2	50512	2	3	0.0133333
MGLL	11343	15	20	0.1465
KBTBD12	166348	3	7	0.0371429
EEFSEC	60678	2	3	0.54
RAB7A	7879	1	2	0.235
ACAD9	28976	1	2	0.005
COPG1	22820	1	2	0.145
EFCAB12	90288	1	1	0.02
MBD4	8930	1	4	0.005
IFT122	55764	1	3	0.06
COL6A5	256076	8	19	0.0342105
COL6A6	131873	8	13	0.194615
ATP2C1	27032	4	4	0.2375
NEK11	79858	4	5	0.454
CPNE4	131034	23	49	0.155102
DNAJC13	23317	1	5	0.004
TMEM108	66000	15	20	0.283
BFSP2	8419	2	3	0.35
CDV3	55573	1	2	0.255
TOPBP1	11073	2	4	0.25
TF	7018	7	12	0.1075
SRPRB	58477	4	9	0.0288889
RAB6B	51560	3	11	0.00636364
SLCO2A1	6578	18	45	0.113333
AMOTL2	51421	1	2	0.005
EPHB1	2047	34	60	0.250333
PPP2R3A	5523	3	7	0.0814286
PCCB	5096	1	4	0.215
STAG1	10274	2	11	0.0872727
IL20RB	53833	1	1	1
SOX14	8403	3	3	0.02
CLDN18	51208	2	5	0.066
A4GNT	51146	1	1	0.01
NME9	347736	1	2	0.01
ESYT3	83850	2	7	0.00714286
PIK3CB	5291	8	8	0.38125
BPESC1	60467	2	3	0.0866667
COPB2	9276	1	2	0.27
NMNAT3	349565	6	11	0.0418182
CLSTN2	64084	30	70	0.0325714
SLC25A36	55186	1	2	0.055
SPSB4	92369	1	8	0.0025
PXYLP1	92370	4	5	0.27
ZBTB38	253461	6	15	0.048
GRK7	131890	2	6	0.0116667
ATP1B3	483	2	3	0.283333
TFDP2	7029	3	9	0.0677778
GK5	256356	2	6	0.0816667
XRN1	54464	1	1	0.01
PLS1	5357	2	5	0.066
TRPC1	7220	1	1	0.02
PCOLCE2	26577	1	10	0.017
U2SURP	23350	1	1	0.19
SLC9A9	285195	20	56	0.0625
PLOD2	5352	3	4	0.1175
PLSCR4	57088	2	5	0.028
PLSCR2	57047	4	4	0.0925
PLSCR1	5359	3	4	0.015
PLSCR5	389158	1	4	0.0075
ZIC4	84107	1	3	0.0266667
AGTR1	185	2	7	0.00714286
CPB1	1360	5	15	0.0493333
CPA3	1359	2	5	0.108
HLTF	6596	2	2	0.015
HPS3	84343	1	3	0.00666667
CP	1356	4	6	0.223333
TM4SF18	116441	2	3	0.00666667
WWTR1	25937	10	31	0.0554839
RNF13	11342	1	5	0.002
MED12L	116931	4	20	0.003
IGSF10	285313	1	1	0.74
MBNL1	4154	5	9	0.185556
RAP2B	5912	1	2	0.095
GPR149	344758	2	4	0.0675
MME	4311	10	18	0.184444
PLCH1	23007	6	18	0.0838889
C3orf33	285315	3	4	0.5125
KCNAB1	7881	11	33	0.0754545
SSR3	6747	1	3	0.256667
TIPARP	25976	2	2	0.075
LEKR1	389170	6	11	0.194545
VEPH1	79674	11	15	0.191333
RSRC1	51319	5	11	0.0209091
MFSD1	64747	1	4	0.0475
SMC4	10051	2	2	0.01
PPM1L	151742	5	14	0.0207143
B3GALNT1	8706	1	7	0.0714286
SI	6476	3	5	0.13
ZBBX	79740	3	6	0.321667
SERPINI2	5276	1	2	0.035
WDR49	151790	5	14	0.157143
PDCD10	11235	2	2	0.105
SERPINI1	5274	5	8	0.16375
GOLIM4	27333	3	11	0.00818182
EGFEM1P	93556	8	32	0.0125
MECOM	2122	42	78	0.231282
MYNN	55892	2	2	0.015
LRRC34	151827	2	2	0.03
LRRC31	79782	2	3	0.336667
SAMD7	344658	2	3	0.613333
PHC3	80012	1	2	0.495
PRKCI	5584	4	5	0.304
CLDN11	5010	1	1	0.93
TNIK	23043	26	49	0.213878
PLD1	5337	1	8	0.0025
FNDC3B	64778	9	32	0.0653125
GHSR	2693	1	4	0.0025
TNFSF10	8743	2	6	0.0266667
NCEH1	57552	7	16	0.0225
SPATA16	83893	5	14	0.111429
NLGN1	22871	32	79	0.109494
NAALADL2	254827	36	94	0.0934043
TBL1XR1	79718	3	10	0.144
KCNMB2	10242	10	28	0.0425
ZMAT3	64393	1	3	0.0966667
PIK3CA	5290	5	6	0.0583333
ZNF639	51193	1	1	0.16
MFN1	55669	3	3	0.446667
GNB4	59345	2	5	0.184
MRPL47	57129	1	1	0.47
USP13	8975	11	19	0.247368
PEX5L	51555	9	23	0.0973913
CCDC39	339829	1	1	0.4
ATP11B	23200	2	3	0.07
MCCC1	56922	1	4	0.0025
LAMP3	27074	2	7	0.114286
MCF2L2	23101	9	21	0.022381
KLHL6	89857	3	5	0.046
KLHL24	54800	2	3	0.13
MAP6D1	79929	1	2	0.185
PARL	55486	2	6	0.00833333
ABCC5	10057	6	17	0.160588
HTR3D	200909	1	2	0.085
HTR3C	170572	2	2	0.755
AP2M1	1173	1	1	0.11
CLCN2	1181	2	4	0.005
EPHB3	2049	1	5	0.046
VPS8	23355	1	5	0.01
C3orf70	285382	4	7	0.01
EHHADH	1962	1	2	0.005
MAP3K13	9175	6	15	0.0246667
SENP2	59343	3	6	0.16
IGF2BP2	10644	2	7	0.00285714
TRA2B	6434	1	3	0.286667
ETV5	2119	1	4	0.0075
DGKG	1608	13	35	0.022
DNAJB11	51726	1	2	0.205
FETUB	26998	1	4	0.0175
HRG	3273	1	4	0.0025
ADIPOQ	9370	3	10	0.009
ST6GAL1	6480	15	33	0.139697
MASP1	5648	2	13	0.0623077
RTP4	64108	3	3	0.663333
BCL6	604	2	2	0.05
LPP	4026	51	101	0.193267
TPRG1	285386	11	19	0.205789
TP63	8626	24	61	0.0732787
P3H2	55214	7	24	0.0558333
IL1RAP	3556	28	43	0.194651
GMNC	647309	4	10	0.122
OSTN	344901	1	8	0.0025
FGF12	2257	52	119	0.0918487
MB21D2	151963	7	14	0.0128571
ATP13A5	344905	2	6	0.0983333
ATP13A4	84239	8	20	0.139
OPA1	4976	2	4	0.335
CPN2	1370	2	7	0.07
LRRC15	131578	3	7	0.0242857
TMEM44	93109	4	7	0.131429
LSG1	55341	1	4	0.0375
FAM43A	131583	1	2	0.085
XXYLT1	152002	10	17	0.110588
ACAP2	23527	6	8	0.195
APOD	347	3	4	0.7475
MUC4	4585	7	10	0.368
TNK2	10188	1	4	0.0425
TFRC	7037	3	5	0.39
ZDHHC19	131540	1	4	0.105
UBXN7	26043	2	3	0.0566667
RNF168	165918	1	3	0.00333333
NRROS	375387	5	11	0.0681818
CEP19	84984	1	1	0.02
PIGX	54965	2	4	0.0275
PAK2	5062	7	12	0.0875
PIGZ	80235	7	10	0.134
MELTF	4241	2	5	0.032
DLG1	1739	3	11	0.00545455
BDH1	622	1	6	0.00166667
LRCH3	84859	3	8	0.0325
IQCG	84223	1	3	0.0366667
LMLN	89782	1	2	0.025
ZNF718	255403	2	2	0.11
ABCA11P	79963	1	1	0.01
PIGG	54872	1	3	0.0566667
PDE6B	5158	1	2	0.18
PCGF3	10336	5	12	0.0875
GAK	2580	3	8	0.07
TMEM175	84286	1	5	0.002
IDUA	3425	2	5	0.008
FGFRL1	53834	1	2	0.03
RNF212	285498	7	8	0.22875
CTBP1	1487	1	3	0.00666667
MAEA	10296	6	7	0.358571
UVSSA	57654	3	5	0.022
FAM53A	152877	2	4	0.1825
NELFA	7469	1	2	0.09
POLN	353497	3	6	0.0566667
MXD4	10608	1	1	0.33
ZFYVE28	57732	11	22	0.118182
CFAP99	402160	2	3	0.123333
[truncated: 6,841 more rows]
