# Supplementary material for: Multiomics Picture of Obesity in Young Adults
Source: Biology (Basel). 2024 Apr 18;13(4):272. doi: 10.3390/biology13040272 (PMC11048234; doi:10.3390/biology13040272)
Supplement: Supplementary file 1 [file biology-13-00272-s001.zip › Table S3.xlsx]

## Sheet: Лист1
Proteins included in the sparse models
AC	SYMBOL	ENTREZID	frac_spls_selected
P01009	SERPINA1	5265	1
P04003	C4BPA	722	1
P05090	APOD	347	1
P07225	PROS1	5627	1
P08603	CFH	3075	1
P10643	C7	730	1
P36955	SERPINF1	5176	1
P01023	A2M	2	0.99
P02765	AHSG	197	0.99
P27169	PON1	5444	0.98
P22352	GPX3	2878	0.94
P02748	C9	735	0.83
P06727	APOA4	337	0.81
P01619	IGKV3-20	28912	0.8
P35858	IGFALS	3483	0.79
P01877	IGHA2	3494	0.76
P01591	JCHAIN	3512	0.75
P01614	IGKV2D-40	28878	0.7
P25311	AZGP1	563	0.66
P01700	IGLV1-47	28822	0.63
P03952	KLKB1	3818	0.59
P80748	IGLV3-21	28796	0.54
Q15413	RYR3	6263	0.52
P23142-4	FBLN1	2192	0.51
P23142	FBLN1	2192	0.5
P19827	ITIH1	3697	0.48
P01768	IGHV3-30	28439	0.44
P05546	SERPIND1	3053	0.42
P06312	IGKV4-1	28908	0.39
P02751	FN1	2335	0.38
P00739	HPR	3250	0.37
A0A0C4DH67	NA	NA	0.35
P0DJI8	SAA1	6288	0.33
P01593	IGKV1D-33	28896	0.3
P01611	IGKV1D-12	28903	0.25
Q06033	ITIH3	3699	0.25
P04259	KRT6B	3854	0.22
A0A075B6J9	NA	NA	0.21
P05156	CFI	3426	0.21
P01763	IGHV3-48	28424	0.19
P07360	C8G	733	0.19
P02768	ALB	213	0.17
P23469-2	PTPRE	5791	0.17
Q01484	ANK2	287	0.17
Q08380	LGALS3BP	3959	0.15
P04004	VTN	7448	0.14
P05160	F13B	2165	0.14
P69905	HBA1	3039	0.14
P01624	IGKV3-15	28913	0.13
P01876	IGHA1	3493	0.11
Q96KN2	CNDP1	84735	0.11
O43866	CD5L	922	0.1
P08697	SERPINF2	5345	0.1
P01019	AGT	183	0.09
P01042-2	KNG1	3827	0.09
P02647	APOA1	335	0.09
P01772	IGHV3-33	28434	0.08
P00736	C1R	715	0.07
P01782	IGHV3-9	28451	0.07
P13671	C6	729	0.07
A0M8Q6	IGLC7	28834	0.06
P0C7W6	CCDC172	374355	0.05
P68871	HBB	3043	0.05
P01767	IGHV3-53	28420	0.04
P05452	CLEC3B	7123	0.04
P0CG04	IGLC1	3537	0.04
P15169	CPN1	1369	0.04
P55056	APOC4	346	0.04
A0A0C4DH25	IGKV3D-20	28874	0.03
P00748	F12	2161	0.03
P01034	CST3	1471	0.03
P01859	IGHG2	3501	0.03
P01860	IGHG3	3502	0.03
P02753	RBP4	5950	0.03
P02787	TF	7018	0.03
P04180	LCAT	3931	0.03
P06276	BCHE	590	0.03
P01871	IGHM	3507	0.02
P02675	FGB	2244	0.02
P04278	SHBG	6462	0.02
P05155	SERPING1	710	0.02
Q13822	ENPP2	5168	0.02
A0A0B4J1V1	IGHV3-21	28444	0.01
P00738	HP	3240	0.01
P01031	C5	727	0.01
P01701	IGLV1-51	28820	0.01
P02652	APOA2	336	0.01
P02749	APOH	350	0.01
P02775	PPBP	5473	0.01
P04114	APOB	338	0.01
P04433	IGKV3-11	28914	0.01
P06396	GSN	2934	0.01
P0DOX7	NA	NA	0.01
P10909	CLU	1191	0.01
P10909-5	CLU	1191	0.01
Q14624	ITIH4	3700	0.01
Q8TAQ9	SUN3	256979	0.01
Q92496	CFHR4	10877	0.01
Q9UGM5	FETUB	26998	0.01
A0A0C4DH55	NA	NA	0
A0A0C4DH68	NA	NA	0
E9PAV3	NACA	4666	0
O14791	APOL1	8542	0
O60243	HS6ST1	9394	0
O75509	TNFRSF21	27242	0
O75636	FCN3	8547	0
O75882	ATRN	8455	0
O95445	APOM	55937	0
P00450	CP	1356	0
P00734	F2	2147	0
P00742	F10	2159	0
P00747	PLG	5340	0
P00751	CFB	629	0
P01008	SERPINC1	462	0
P01011	SERPINA3	12	0
P01024	C3	718	0
P01042	KNG1	3827	0
P01703	IGLV1-40	28825	0
P01764	IGHV3-23	28442	0
P01824	IGHV4-39	28394	0
P01834	IGKC	3514	0
P01857	IGHG1	3500	0
P01861	IGHG4	3503	0
P01880	IGHD	3495	0
P02042	HBD	3045	0
P02649	APOE	348	0
P02654	APOC1	341	0
P02655	APOC2	344	0
P02656	APOC3	345	0
P02671	FGA	2243	0
P02679	FGG	2266	0
P02746	C1QB	713	0
P02747	C1QC	714	0
P02750	LRG1	116844	0
P02751-1	FN1	2335	0
P02760	AMBP	259	0
P02763	ORM1	5004	0
P02766	TTR	7276	0
P02774	GC	2638	0
P02790	HPX	3263	0
P04196	HRG	3273	0
P04217	A1BG	1	0
P04264	KRT1	3848	0
P05543	SERPINA7	6906	0
P06396-2	GSN	2934	0
P06681	C2	717	0
P07357	C8A	731	0
P07358	C8B	732	0
P08185	SERPINA6	866	0
P08519	LPA	4018	0
P09871	C1S	716	0
P0C0L4	C4A	720	0
P0C0L5	C4B	721	0
P0DOX2	NA	NA	0
P0DOX3	NA	NA	0
P10909-2	CLU	1191	0
P19652	ORM2	5005	0
P19823	ITIH2	3698	0
P20742	PZP	5858	0
P22792	CPN2	1370	0
P29622	SERPINA4	5267	0
P35542	SAA4	6291	0
P43251	BTD	686	0
P43652	AFM	173	0
P49908	SEPP1	NA	0
P51884	LUM	4060	0
P80108	GPLD1	2822	0
Q10589	BST2	684	0
Q14520	HABP2	3026	0
Q16610	ECM1	1893	0
Q96IY4	CPB2	1361	0
Q96PD5	PGLYRP2	114770	0
Q99963	SH3GL3	6457	0
Q9BZ29	DOCK9	23348	0
