# Supplementary material for: Multiomics Picture of Obesity in Young Adults
Source: Biology (Basel). 2024 Apr 18;13(4):272. doi: 10.3390/biology13040272 (PMC11048234; doi:10.3390/biology13040272)
Supplement: Supplementary file 1 [file biology-13-00272-s001.zip › Table S4.xlsx]

## Sheet: Лист1
Results of the overrepresentation analysis for proteins
ID	Description	GeneRatio	BgRatio	pvalue	p.adjust	qvalue	geneID	Count
WP558	Complement and coagulation cascades	18/50	58/8389	1.08163e-27	1.11408e-25	8.53916e-26	715/2161/5265/3827/2244/735/3818/710/3426/2165/3053/5627/733/3075/5345/730/1191/729	18
WP2806	Complement system	17/50	95/8389	1.35065e-21	6.95584e-20	5.3315e-20	2161/727/335/2244/735/213/3818/722/7448/710/3426/5627/3075/730/729/1369/10877	17
WP5090	Complement system in neuronal development and plasticity	13/50	107/8389	2.68943e-14	9.23372e-13	7.07745e-13	715/727/735/722/7448/710/3426/5627/733/3075/730/1191/729	13
WP545	Complement activation	6/50	23/8389	3.07462e-09	7.91715e-08	6.06833e-08	715/727/735/733/730/729	6
WP176	Folate metabolism	8/50	69/8389	5.63631e-09	1.16108e-07	8.89944e-08	335/2244/213/338/6288/2878/3043/3039	8
WP4969	RAS and bradykinin pathways in COVID 19	6/50	29/8389	1.40818e-08	2.41738e-07	1.85287e-07	2161/183/3827/3818/710/1369	6
WP5109	Familial hyperlipidemia type 2	5/50	16/8389	2.54742e-08	3.74834e-07	2.87302e-07	335/336/338/3931/337	5
WP15	Selenium micronutrient network	8/50	87/8389	3.63375e-08	4.67845e-07	3.58594e-07	335/2244/213/338/6288/2878/3043/3039	8
WP272	Blood clotting cascade	5/50	22/8389	1.49505e-07	1.71101e-06	1.31145e-06	2161/2244/3818/2165/5345	5
WP3601	Lipid particles composition	4/50	10/8389	2.28421e-07	2.35273e-06	1.80332e-06	335/336/338/3931	4
WP1533	Vitamin B12 metabolism	6/50	51/8389	4.83452e-07	4.52687e-06	3.46975e-06	335/213/338/6288/3043/3039	6
WP5110	Familial hyperlipidemia type 3	4/50	13/8389	7.67529e-07	6.58796e-06	5.04953e-06	335/336/3931/337	4
WP430	Statin inhibition of cholesterol production	5/50	31/8389	9.2651e-07	7.34081e-06	5.62658e-06	335/336/338/3931/337	5
WP5112	Familial hyperlipidemia type 5	4/50	15/8389	1.45246e-06	1.0686e-05	8.19056e-06	335/336/3931/337	4
WP4493	Cells and molecules involved in local acute inflammatory response	4/50	17/8389	2.51034e-06	1.61603e-05	1.23865e-05	727/3827/730/729	4
WP4522	Metabolic pathway of LDL HDL and TG including diseases	4/50	17/8389	2.51034e-06	1.61603e-05	1.23865e-05	335/336/338/3931	4
WP5108	Familial hyperlipidemia type 1	4/50	18/8389	3.21343e-06	1.94696e-05	1.4923e-05	335/336/3931/337	4
WP5304	Cholesterol metabolism	6/50	72/8389	3.81507e-06	2.18307e-05	1.67328e-05	335/336/350/338/3931/337	6
WP5111	Familial hyperlipidemia type 4	4/50	22/8389	7.54798e-06	4.0918e-05	3.13628e-05	335/336/3931/337	4
WP5333	Enterocyte cholesterol metabolism	3/50	36/8389	0.00123864	0.00637899	0.00488937	335/338/337	3
WP496	Steroid biosynthesis	2/50	10/8389	0.00151966	0.00745357	0.00571301	2165/1369	2
WP2328	Allograft rejection	4/50	90/8389	0.00195776	0.00916587	0.00702545	727/735/730/729	4
WP554	ACE inhibitor pathway	2/50	17/8389	0.004472	0.0200268	0.0153501	183/3827	2
WP2878	PPAR alpha pathway	2/50	26/8389	0.010328	0.0443244	0.0339737	335/336	2
WP5036	Angiotensin II receptor type 1 pathway	2/50	28/8389	0.0119217	0.0491173	0.0376474	2161/183	2
WP453	Inflammatory response pathway	2/50	30/8389	0.013616	0.0539403	0.0413441	2335/7448	2
WP5323	Fatty Acids and Lipoproteins Transport in Hepatocytes	2/50	35/8389	0.0182758	0.0697186	0.0534379	338/337	2
WP3941	Oxidative damage response	2/50	40/8389	0.0235108	0.0864863	0.06629	715/727	2
WP4673	Male infertility	3/50	145/8389	0.0549951	0.195327	0.149714	338/1191/5444	3
WP5104	Acquired partial lipodystrophy Barraquer Simons syndrome	1/50	10/8389	0.0580588	0.199335	0.152786	727	1
WP3942	PPAR signaling pathway	2/50	68/8389	0.0618316	0.202809	0.155449	335/336	2
WP2007	Iron metabolism in placenta	1/50	11/8389	0.0636796	0.202809	0.155449	7018	1
WP229	Irinotecan pathway	1/50	12/8389	0.0692676	0.202809	0.155449	590	1
WP2814	Mammary gland development pathway Puberty Stage 2 of 4	1/50	13/8389	0.0748229	0.202809	0.155449	2335	1
WP3301	MFAP5 mediated ovarian cancer cell motility and invasiveness	1/50	13/8389	0.0748229	0.202809	0.155449	6263	1
WP3679	Cell type dependent selectivity of CCK2R signaling	1/50	13/8389	0.0748229	0.202809	0.155449	6263	1
WP5186	Vitamin K metabolism and activation of dependent proteins	1/50	13/8389	0.0748229	0.202809	0.155449	5627	1
WP5318	Female steroid hormones in cardiomyocyte energy metabolism	1/50	13/8389	0.0748229	0.202809	0.155449	338	1
WP4891	COVID 19 adverse outcome pathway	1/50	15/8389	0.0858361	0.226695	0.173757	183	1
WP3859	TGF beta signaling in thyroid cells for epithelial mesenchymal transition	1/50	17/8389	0.0967209	0.239043	0.183222	2335	1
WP5172	Iron metabolism disorders	1/50	17/8389	0.0967209	0.239043	0.183222	7018	1
WP3670	Interactions between LOXL4 and oxidative stress pathway	1/50	18/8389	0.102116	0.239043	0.183222	2335	1
WP3967	miR 509 3p alteration of YAP1 ECM axis	1/50	18/8389	0.102116	0.239043	0.183222	2335	1
WP4936	Perturbations to host cell autophagy induced by SARS CoV 2 proteins	1/50	18/8389	0.102116	0.239043	0.183222	338	1
WP100	Glutathione metabolism	1/50	19/8389	0.107479	0.240659	0.18446	2878	1
WP3287	Overview of nanoparticle effects	1/50	19/8389	0.107479	0.240659	0.18446	2335	1
WP5066	FOXA2 pathway	1/50	21/8389	0.118111	0.258838	0.198394	338	1
WP4760	PKC gamma calcium signaling pathway in ataxia	1/50	22/8389	0.12338	0.264753	0.202928	6263	1
WP1528	Physiological and pathological hypertrophy of the heart	1/50	24/8389	0.133827	0.281309	0.215617	183	1
WP2263	Androgen receptor network in prostate cancer	2/50	109/8389	0.137351	0.282943	0.21687	2165/1369	2
WP5183	SARS CoV 2 mitochondrial chronic oxidative stress and endothelial dysfunction	1/50	26/8389	0.144151	0.291128	0.223144	183	1
WP2643	Nanoparticle mediated activation of receptor signaling	1/50	28/8389	0.154355	0.305741	0.234344	2335	1
WP4941	GPR143 in melanocytes and retinal pigment epithelium cells	1/50	30/8389	0.164439	0.319571	0.244944	5176	1
WP727	Monoamine transport	1/50	32/8389	0.174406	0.329867	0.252837	183	1
WP408	Oxidative stress response	1/50	33/8389	0.179345	0.329867	0.252837	2878	1
WP4786	Type I collagen synthesis in the context of osteogenesis imperfecta	1/50	33/8389	0.179345	0.329867	0.252837	5176	1
WP2447	Amyotrophic lateral sclerosis ALS	1/50	38/8389	0.203612	0.352081	0.269863	1471	1
WP2911	miRNA targets in ECM and membrane receptors	1/50	38/8389	0.203612	0.352081	0.269863	2335	1
WP3591	Sleep regulation	1/50	38/8389	0.203612	0.352081	0.269863	1471	1
WP2884	NRF2 pathway	2/50	141/8389	0.205096	0.352081	0.269863	5265/2878	2
WP51	Regulation of actin cytoskeleton	2/50	151/8389	0.227037	0.365609	0.280232	2335/2934	2
WP364	IL6 signaling pathway	1/50	43/8389	0.227175	0.365609	0.280232	183	1
WP4136	Fibrin complement receptor 3 signaling pathway	1/50	43/8389	0.227175	0.365609	0.280232	2244	1
WP716	Vitamin A and carotenoid metabolism	1/50	43/8389	0.227175	0.365609	0.280232	5950	1
WP4756	Renin angiotensin aldosterone system RAAS	1/50	44/8389	0.231805	0.367321	0.281544	183	1
WP5300	TROP2 regulatory signaling	1/50	45/8389	0.236407	0.368939	0.282784	2335	1
WP2848	Pluripotent stem cell differentiation pathway	1/50	48/8389	0.250054	0.380757	0.291842	7018	1
WP4239	Epithelial to mesenchymal transition in colorectal cancer	2/50	162/8389	0.251373	0.380757	0.291842	2335/7448	2
WP3940	One carbon metabolism and related pathways	1/50	53/8389	0.272269	0.406431	0.311521	2878	1
WP5348	11p11 2 copy number variation syndrome	1/50	56/8389	0.285287	0.41978	0.321753	3959	1
WP3624	Lung fibrosis	1/50	64/8389	0.318897	0.436605	0.334649	5265	1
WP4906	3q29 copy number variation syndrome	1/50	64/8389	0.318897	0.436605	0.334649	7018	1
WP4313	Ferroptosis	1/50	65/8389	0.322988	0.436605	0.334649	7018	1
WP3680	Physico chemical features and toxicity associated pathways	1/50	66/8389	0.327054	0.436605	0.334649	2335	1
WP5039	SARS CoV 2 innate immunity evasion and cell specific immune response	1/50	66/8389	0.327054	0.436605	0.334649	5473	1
WP306	Focal adhesion	2/50	199/8389	0.333311	0.436605	0.334649	2335/7448	2
WP2525	Trans sulfuration one carbon metabolism and related pathways	1/50	68/8389	0.335116	0.436605	0.334649	2878	1
WP3303	RAC1 PAK1 p38 MMP2 pathway	1/50	68/8389	0.335116	0.436605	0.334649	2335	1
WP1982	Sterol regulatory element binding proteins SREBP signaling	1/50	69/8389	0.339111	0.436605	0.334649	5950	1
WP5158	Urotensin II mediated signaling pathway	1/50	69/8389	0.339111	0.436605	0.334649	2335	1
WP2572	Primary focal segmental glomerulosclerosis FSGS	1/50	72/8389	0.350956	0.446277	0.342062	7448	1
WP5356	Disturbed pathways in Duchenne Muscular Dystrophy	1/50	74/8389	0.358737	0.450608	0.345382	2244	1
WP5205	Clock controlled autophagy in bone metabolism	1/50	80/8389	0.381535	0.473471	0.362906	5176	1
WP5353	A network map of Macrophage stimulating protein MSP signaling	1/50	82/8389	0.388956	0.476934	0.36556	2335	1
WP4336	ncRNAs involved in Wnt signaling in hepatocellular carcinoma	1/50	89/8389	0.41425	0.501974	0.384752	5176	1
WP5345	1p36 copy number variation syndrome	1/50	95/8389	0.435112	0.519164	0.397928	7448	1
WP4658	Small cell lung cancer	1/50	96/8389	0.438517	0.519164	0.397928	2335	1
WP4258	lncRNA in canonical Wnt signaling and colorectal cancer	1/50	98/8389	0.445268	0.521166	0.399463	5176	1
WP1544	MicroRNAs in cardiomyocyte hypertrophy	1/50	104/8389	0.465046	0.538199	0.412518	183	1
WP5380	5q35 copy number variation	1/50	111/8389	0.487248	0.557628	0.42741	2161	1
WP428	Wnt signaling	1/50	114/8389	0.496484	0.561954	0.430726	5176	1
WP2431	Spinal cord injury	1/50	120/8389	0.51447	0.575983	0.441479	727	1
WP4657	22q11 2 copy number variation syndrome	1/50	127/8389	0.534659	0.585409	0.448704	3053	1
WP4217	Ebola virus infection in host	1/50	129/8389	0.540275	0.585409	0.448704	2934	1
WP5095	Overview of proinflammatory and profibrotic mediators	1/50	129/8389	0.540275	0.585409	0.448704	5473	1
WP236	Adipogenesis	1/50	131/8389	0.545824	0.585409	0.448704	183	1
WP366	TGF beta signaling pathway	1/50	133/8389	0.551308	0.585409	0.448704	2335	1
WP536	Calcium regulation in cardiac cells	1/50	152/8389	0.600268	0.630894	0.483567	6263	1
WP289	Myometrial relaxation and contraction pathways	1/50	156/8389	0.609888	0.63453	0.486354	6263	1
WP706	Sudden infant death syndrome SIDS susceptibility pathways	1/50	160/8389	0.61928	0.637859	0.488905	7018	1
WP3929	Chemokine signaling pathway	1/50	166/8389	0.632955	0.645489	0.494754	5473	1
WP702	Metapathway biotransformation Phase I and II	1/50	185/8389	0.673159	0.677131	0.519007	2878	1
WP2877	Vitamin D receptor pathway	1/50	187/8389	0.677131	0.677131	0.519007	3827	1
