# Supplementary material for: Multiomics Picture of Obesity in Young Adults
Source: Biology (Basel). 2024 Apr 18;13(4):272. doi: 10.3390/biology13040272 (PMC11048234; doi:10.3390/biology13040272)
Supplement: Supplementary file 1 [file biology-13-00272-s001.zip › Table S5.xlsx]

## Sheet: Лист1
Metabolites included in the sparse models
Name	INCHIKEY	HMDB	KEGG	frac_spls_selected
L-Glutamic acid, 3TMS derivative	WHUUTDBJXJRKMK-VKHMYHEASA-N	HMDB0000148	C00025	1
L-Cystine, 4TMS derivative	LEVWYRKDKASIDU-IMJSIDKUSA-N	HMDB0000192	C00491	0.96
L-Tyrosine, 3TMS derivative	OUYCCCASQSFEME-QMMMGPOBSA-N	HMDB0000158	C00082	0.65
Doconexent, TMS derivative	MBMBGCFOFBJSGT-KUBAVDMBSA-N	HMDB0002183	C06429	0.62
2-Hydroxybutyric acid, 2TMS derivative	AFENDNXGAFYKQO-UHFFFAOYSA-N	HMDB0341410	No result	0.6
d-Mannose, 2,3,4,5,6-pentakis-O-(trimethylsilyl)-, o-methyloxyme, (1Z)-	WQZGKKKJIJFFOK-SVZMEOIVSA-N	HMDB0000143	C00124	0.6
L-Isoleucine, 2TMS derivative	AGPKZVBTJJNPAG-WHFBIAKZSA-N	HMDB0000172	C00407	0.59
L-Leucine, 2TMS derivative	ROHFNLRQFUQHCH-YFKPBYRVSA-N	HMDB0000687	C00123	0.59
D-Threitol, 4TMS derivative	UNXHWFMMPAWVPI-QWWZWVQMSA-N	HMDB0004136	C16884	0.59
Octanoic acid, 2-dimethylaminoethyl ester	RBLJYVBVMVTWKL-UHFFFAOYSA-N	undefined	No result	0.58
Aceturic acid, 2TMS derivative	OKJIRPAQVSHGFK-UHFFFAOYSA-N	HMDB0000532	No result	0.58
Acetic acid, bis[(trimethylsilyl)oxyl]-, trimethylsilyl ester	QTBSBXVTEAMEQO-UHFFFAOYSA-N	HMDB0000042	C00033	0.58
Undecane	RSJKGSCJYJTIGS-UHFFFAOYSA-N	HMDB0031445	No result	0.58
Palmitelaidic acid, TMS derivative	SECPZKHBENQXJG-BQYQJAHWSA-N	HMDB0012328	No result	0.57
Methanephosphonothioic acid, O,O'-bis(trimethylsilyl) ester	WXJXBKBJAKPJRN-UHFFFAOYSA-N	HMDB0254659	No result	0.57
Hydantoin, 5-hydroxy-tris-O-(trimethylsilyl)-	LGRQUXHYJBFGTM-UHFFFAOYSA-N	undefined	No result	0.57
Carbonic acid, 2-dimethylaminoethyl ethyl ester	SEOMLBHFIBCXBL-UHFFFAOYSA-N	undefined	No result	0.57
Propanoic acid, 2-(methoxyimino)-, trimethylsilyl ester	XBDQKXXYIPTUBI-UHFFFAOYSA-N	HMDB0000237	C00163	0.57
Fluvoxamine, N,N-bis(trimethylsilyl)-	CJOFXWAVKWHTFT-XSFVSMFZSA-N	HMDB0014322	C07571	0.57
Glycerol, 3TMS derivative	PEDCQBHIVMGVHV-UHFFFAOYSA-N	HMDB0000131	C00116	0.56
L-Threonine, 3TMS derivative	AYFVYJQAPQTCCC-GBXIJSLDSA-N	HMDB0000167	C00188	0.56
Asparagine, 3TMS derivative	DCXYFEDJOCDNAF-REOHCLBHSA-N	HMDB0000168	C00152	0.56
L-Ornithine, 3TMS derivative	AHLPHDHHMVZTML-BYPYZUCNSA-N	HMDB0000214	C00077	0.56
Glycine, di-TMS	DHMQDGOQFOQNFH-UHFFFAOYSA-N	HMDB0000123	C00037	0.54
Leucine	ROHFNLRQFUQHCH-YFKPBYRVSA-N	HMDB0000687	C00123	0.54
3-Pyridinol, TMS derivative	GRFNBEZIAWKNCO-UHFFFAOYSA-N	undefined	No result	0.53
Decanoic acid, TMS derivative	GHVNFZFCNZKVNT-UHFFFAOYSA-N	HMDB0000511	C01571	0.53
L-Glutamine, 3TMS derivative	ZDXPYRJPNDTMRX-VKHMYHEASA-N	HMDB0000641	C00064	0.52
Lactic Acid, 2TMS derivative	JVTAAEKCZFNVCJ-UHFFFAOYSA-N	HMDB0000190	C01432	0.52
d-Glucose, 2,3,4,5,6-pentakis-O-(trimethylsilyl)-, o-methyloxyme, (1Z)-	WQZGKKKJIJFFOK-GASJEMHNSA-N	HMDB0000122	C00031	0.52
L-5-Oxoproline, , 2TMS derivative	ODHCTXKNWHHXJC-VKHMYHEASA-N	HMDB0000267	C01879	0.51
Alloxanic acid, 4TMS derivative	BXTYRIKKNHXERN-UHFFFAOYSA-N	undefined	No result	0.51
S-[2-[N,N-Dimethylamino]ethyl]N,N-dimethylcarbamoyl thiocarbohydroximate	VCLDRJHBZHEPNO-CLFYSBASSA-N	undefined	No result	0.49
Ritalinic acid, 2TMS derivative	INGSNVSERUZOAK-UHFFFAOYSA-N	HMDB0042008	No result	0.48
Parabanic acid, bis-O-(trimethylsilyl)-	ZFLIKDUSUDBGCD-UHFFFAOYSA-N	HMDB0062802	No result	0.47
m-Cresol, TMS derivative	RLSSMJSEOOYNOY-UHFFFAOYSA-N	HMDB0002048	C01467	0.45
Ethyl 4-(ethyloxy)-2-oxobut-3-enoate	XPBYGYFJOZXYOE-AATRIKPKSA-N	undefined	No result	0.45
Tridecane	IIYFAKIEWZDVMP-UHFFFAOYSA-N	HMDB0034284	C13834	0.44
Heptadecane, 2,6,10,15-tetramethyl-	ZZEQNXPBKOFTBG-UHFFFAOYSA-N	HMDB0062787	No result	0.43
L-Proline, trimethylsilyl ester	ONIBWKKTOPOVIA-BYPYZUCNSA-N	HMDB0000162	C00148	0.43
Arachidonic acid, TMS derivative	YZXBAPSDXZZRGB-DOFZRALJSA-N	HMDB0001043	C00219	0.4
Malonic acid, bis(2-trimethylsilylethyl ester	OFOBLEOULBTSOW-UHFFFAOYSA-N	HMDB0000691	C00383	0.4
Phenylalanine, 2TMS derivative	COLNVLDHVKWLRT-QMMMGPOBSA-N	HMDB0000159	C00079	0.38
L-Aspartic acid, 3TMS derivative	CKLJMWTZIZZHCS-REOHCLBHSA-N	HMDB0000191	C00049	0.37
2,3,4-Trihydroxybutyric acid tetrakis(trimethylsilyl) deriv., (, (R*,R*)-)	JPIJQSOTBSSVTP-PWNYCUMCSA-N	HMDB0000613	No result	0.33
Glycidyl palmitate	KYVUJPJYTYQNGJ-UHFFFAOYSA-N	undefined	No result	0.31
9H-Purine, 9-(trimethylsilyl)-2,6,8-tris[(trimethylsilyl)oxy]-	KDCGOANMDULRCW-UHFFFAOYSA-N	HMDB0001366	C15587	0.3
L-Histidine, N,1-bis(trimethylsilyl)-, trimethylsilyl ester	HNDVDQJCIGZPNO-YFKPBYRVSA-N	HMDB0000177	C00135	0.29
2-Aminobutanoic acid, 2TMS derivative	QWCKQJZIFLGMSD-UHFFFAOYSA-N	HMDB0245013	No result	0.29
D-Gluconic acid, 6TMS derivative	RGHNJXZEOKUKBD-SQOUGZDYSA-N	HMDB0000625	C00257	0.25
3-Indoleacetic acid, 2TMS derivative	SEOVTRFCIGRIMH-UHFFFAOYSA-N	HMDB0000197	C00954	0.25
Pyruvic acid, TMS derivative	LCTONWCANYUPML-UHFFFAOYSA-N	HMDB0000243	C00022	0.23
Diethylene glycol, n-butyl ether, trimethylsilyl ether	OAYXUHPQHDHDDZ-UHFFFAOYSA-N	HMDB0244918	No result	0.22
Trifluoroacetic Acid, TMS derivative	DTQVDTLACAAQTR-UHFFFAOYSA-N	HMDB0014118	No result	0.22
L-Valine, 2TMS derivative	KZSNJWFQEVHDMF-BYPYZUCNSA-N	HMDB0000883	C00183	0.2
Caffeine	RYYVLZVUVIJVGH-UHFFFAOYSA-N	HMDB0001847	C07481	0.2
Myo-Inositol, 6TMS derivative	CDAISMWEOUEBRE-UHFFFAOYSA-N	HMDB0000211	C00137	0.17
L-Methionine Sulfoxide, N,N-bis(triimethylsilyl)-, trimethylsilyl ester	FFEARJCKVFRZRR-BYPYZUCNSA-N	HMDB0000696	C00073	0.16
d-Galactose, 2,3,4,5,6-pentakis-O-(trimethylsilyl)-, o-methyloxyme, (1E)-	WQZGKKKJIJFFOK-SVZMEOIVSA-N	HMDB0000143	C00124	0.14
Glycine, 3TMS derivative	DHMQDGOQFOQNFH-UHFFFAOYSA-N	HMDB0000123	C00037	0.13
L-Ornithine, 4TMS derivative	AHLPHDHHMVZTML-BYPYZUCNSA-N	HMDB0000214	C00077	0.11
(2S,4R)-4-Methyl-2-(2-methylprop-1-en-1-yl)tetrahydro-2H-pyran	CZCBTSFUTPZVKJ-NXEZZACHSA-N	undefined	No result	0.11
Lanthionine, N,N',O,O'-tetrakis(trimethylsilyl)-	DWPCPZJAHOETAG-IMJSIDKUSA-N	HMDB0240656	No result	0.1
Cholest-5-en-3-ol, (3a)-, TMS derivative	HVYWMOMLDIMFJA-UHFFFAOYSA-N	undefined	No result	0.09
Heptadecanoic acid, TMS derivative	KEMQGTRYUADPNZ-UHFFFAOYSA-N	HMDB0002259	No result	0.09
D-Arabinose, 4TMS derivative	SRBFZHDQGSBBOR-HWQSCIPKSA-N	HMDB0000646	C00259	0.09
4-Hydroxybutanoic acid, 2TMS derivative	SJZRECIVHVDYJC-UHFFFAOYSA-N	HMDB0000710	C00989	0.08
L-Alanine, 2TMS derivative	QNAYBMKLOCPYGJ-REOHCLBHSA-N	HMDB0000161	C00041	0.06
Serine, 3TMS derivative	MTCFGRXMJLQNBG-REOHCLBHSA-N	HMDB0000187	C00065	0.06
Citric acid, 4TMS derivative	KRKNYBCHXYNGOX-UHFFFAOYSA-N	HMDB0000094	C00158	0.05
Cadaverine, 4TMS derivative	VHRGRCVQAFMJIZ-UHFFFAOYSA-N	HMDB0002322	C01672	0.05
Urea, 2TMS derivative	XSQUKJJJFZCRTK-UHFFFAOYSA-N	HMDB0000294	C00086	0.04
3-Hydroxybutyric acid, 2TMS derivative	WHBMMWSBFZVSSR-UHFFFAOYSA-N	HMDB0000011	C01089	0.04
N-Acetylglutamine,N,N',O,O'- tetrakis(trimethylsilyl)-	KSMRODHGGIIXDV-UHFFFAOYSA-N	HMDB0006029	No result	0.03
L-Proline, 2TMS derivative	ONIBWKKTOPOVIA-BYPYZUCNSA-N	HMDB0000162	C00148	0.03
L-Tryptophan, 3TMS derivative	QIVBCDIJIAJPQS-VIFPVBQESA-N	HMDB0000929	C00078	0.03
a-D-Mannopyranose, 5TMS derivative	NBSOZVWQAKGBSC-JMTTVTNBSA-N	HMDB0000169	C00159	0.03
2-Pyrrolidinone, 1-methyl-	SECXISVLQFMRJM-UHFFFAOYSA-N	undefined	C11118	0.03
Ethyl a-D-glucopyranoside, 4TMS derivative	WYUFTYLVLQZQNH-KEWYIRBNSA-N	HMDB0029968	No result	0.03
1,5-Anhydroglucitol, 4TMS derivative	MPCAJMNYNOGXPB-SLPGGIOYSA-N	HMDB0002712	C07326	0.02
Undecanenitrile	SZKKNEOUHLFYNA-UHFFFAOYSA-N	undefined	No result	0.02
Hexacosane	HMSWAIKSFDFLKN-UHFFFAOYSA-N	HMDB0061867	No result	0.02
Oxalic acid, 2TMS derivative	MUBZPKHOEPUJKR-UHFFFAOYSA-N	HMDB0002329	C00209	0.01
L-Lysine, 4TMS derivative	KDXKERNSBIXSRK-YFKPBYRVSA-N	HMDB0000182	C00047	0.01
a-Methyl-L-tyrosine, 3TMS derivative	NHTGHBARYWONDQ-JTQLQIEISA-NÂ Â	HMDB0014903	C07921	0.01
Diethylene glycol, 2TMS derivative	MTHSVFCYNBDYFN-UHFFFAOYSA-N	HMDB0251245	C14689	0.01
Methyl galactoside, 4TMS derivative	HOVAGTYPODGVJG-VOQCIKJUSA-N	HMDB0029965	C03619	0.01
Arachidonoyl amide, N-(trimethylsilyl)-	BNBSCAZCQDLUDU-DOFZRALJSA-N	undefined	No result	0.01
Glyceric acid, 3TMS derivative	RBNPOMFGQQGHHO-UHFFFAOYSA-N	HMDB0000139	C00258	0.01
Methane, isocyanato-	HAMGRBXTJNITHG-UHFFFAOYSA-N	undefined	No result	0.01
Erythritol, 4TMS derivative	UNXHWFMMPAWVPI-ZXZARUISSA-N	HMDB0002994	C00503	0.01
Scyllo-Inositol, 6TMS derivative	CDAISMWEOUEBRE-UHFFFAOYSA-N	HMDB0000211	C00137	0.01
2-Hydroxy-3-methylbutyric acid, 2TMS derivative	NGEWQZIDQIYUNV-UHFFFAOYSA-N	HMDB0000407	No result	0.01
Silanol, trimethyl-, phosphate (3:1)	NBIIXXVUZAFLBC-UHFFFAOYSA-K	HMDB0001429	No result	0
Ribitol, 5TMS derivative	HEBKCHPVOIAQTA-NGQZWQHPSA-N	HMDB0000508	C00474	0
2-Aminomalonic acid, N,O,O,-TMS	JINBYESILADKFW-UHFFFAOYSA-N	HMDB0001147	C00872	0
Edetic Acid, 4TMS derivative	KCXVZYZYPLLWCC-UHFFFAOYSA-N	HMDB0015109	C00284	0
Mannonic acid, ?-lactone, 4TMS derivavative	RGHNJXZEOKUKBD-MBMOQRBOSA-N	HMDB0242119	C00514	0
N-Formylglycine, 2TMS derivative	UGJBHEZMOKVTIM-UHFFFAOYSA-N	HMDB0255145	No result	0
9,12-Octadecadienoic acid (Z,Z)-, TMS derivative	OYHQOLUKZRVURQ-UHFFFAOYSA-N	HMDB0247706	No result	0
D-Fructose, 1,3,4,5,6-pentakis-O-(trimethylsilyl)-, O-methyloxime	LKDRXBCSQODPBY-VRPWFDPXSA-N	HMDB0000660	C02336	0
Pipecolic acid, 2TMS derivative	HXEACLLIILLPRG-UHFFFAOYSA-N	HMDB0000070	No result	0
2-Hydroperoxytetrahydrofuran, TMS derivative	JSZPBTUOIOMFMS-UHFFFAOYSA-N	undefined	No result	0
Pseudo uridine penta-tms	PTJWIQPHWPFNBW-GBNDHIKLSA-N	HMDB0000767	C02067	0
L-Lysine, 3TMS derivative	KDXKERNSBIXSRK-YFKPBYRVSA-N	HMDB0000182	C00047	0
L-Hydroxyproline, (E)-, 3TMS derivative	PMMYEEVYMWASQN-DMTCNVIQSA-N	HMDB0000725	C01157	0
4-Pyridinol, TMS derivative	GCNTZFIIOFTKIY-UHFFFAOYSA-N	undefined	No result	0
Quinine, tert-Butyldimethylsilyl ether	LOUPRKONTZGTKE-WZBLMQSHSA-N	HMDB0014611	No result	0
Cyclohexane, nonadecyl-	YVTPTBVYGTYTKP-UHFFFAOYSA-N	undefined	No result	0
Nonanamide	GHLZUHZBBNDWHW-UHFFFAOYSA-N	undefined	No result	0
Arabinofuranose, 1,2,3,5-tetrakis-O-(trimethylsilyl)-	HMFHBZSHGGEWLO-HWQSCIPKSA-N	HMDB0012325	C06115	0
L-3-Methylhistidine, 2TMS derivative	JDHILDINMRGULE-LURJTMIESA-N	HMDB0000479	C01152	0
Dimyristyl thiodipropionate	LVEOKSIILWWVEO-UHFFFAOYSA-N	undefined	No result	0
Hippuric acid, TMS derivative	QIAFMBKCNZACKA-UHFFFAOYSA-N	HMDB0000714	C01586	0
D-(+)-Xylose, tetrakis(trimethylsilyl) ether, methyloxime (anti)	SRBFZHDQGSBBOR-IOVATXLUSA-N	HMDB0000098	C00181	0
Octadecanoic acid, 2-(dimethylamino)ethyl ester	SXIOLYXSOHUULZ-UHFFFAOYSA-N	undefined	No result	0
2-Dodecene, (E)-	ADOQBZAVKYCFOI-HWKANZROSA-N	HMDB0061819	No result	0
L-Tryptophan, 1-(trimethylsilyl)-, trimethylsilyl ester	QIVBCDIJIAJPQS-VIFPVBQESA-N	HMDB0000929	C00078	0
Carbonic acid, octadecyl vinyl ester	RQCMOYRPNPEGDL-UHFFFAOYSA-N	undefined	No result	0
Timonacic, 2TMS derivative	DZLNHFMRPBPULJ-UHFFFAOYSA-N	HMDB0258979	D08601	0
1,2-Benzisothiazol-3-amine, TBDMS derivative	MPOIIFBOQOKVBM-UHFFFAOYSA-N	undefined	No result	0
Ribonic acid, 2,3,4,5-tetrakis-O-(trimethylsilyl)-, trimethylsilyl ester	QXKAIJAYHKCRRA-BXXZVTAOSA-N	HMDB0000867	C01685	0
Lauryl acetate	VZWGRQBCURJOMT-UHFFFAOYSA-N	HMDB0038969	No result	0
9,12-Octadecadienoic acid, methyl ester, (E,E)-	WTTJVINHCBCLGX-ZDVGBALWSA-N	undefined	No result	0
Fumaric acid, 2-dimethylaminoethyl heptyl ester	ASMPZXPCOAGAJC-MDZDMXLPSA-N	undefined	No result	0
Cyclopropanenonanoic acid, methyl ester	BWTASFYKDVYYKM-UHFFFAOYSA-N	undefined	No result	0
1-Methyl-N,N-bis(trimethylsilyl)-4-[(trimethylsilyl)oxy]-1H-imidazol-2-amine	DDRJAANPRJIHGJ-UHFFFAOYSA-N	HMDB0000562	C00791	0
2-Undecanethiol, 2-methyl-	FRQQKWGDKVGLFI-UHFFFAOYSA-N	undefined	No result	0
Eicosane, 7-hexyl-	JRLUJYJPNVXXKS-UHFFFAOYSA-N	undefined	No result	0
Galacto-Hexodialdose, 2,3,4,5-tetrakis-O-(trimethylsilyl)-, bis(O-methyloxime)	LABWFKZNXLWHGQ-SVZMEOIVSA-N	undefined	C03269	0
ÃŸ-Hydroxyethyltheophylline tert-butyldimethylsilyl ether	NWPRCRWQMGIBOT-UHFFFAOYSA-N	undefined	D07933	0
1,2-Bis(diethylamino)-1,2-bis(4-cyanophenyl)ethane	OJYKFEOVLMSQSH-UHFFFAOYSA-N	undefined	No result	0
1-Hexanamine, 2-ethyl-N-(2-ethylhexyl)-N-methyl-	VPCAZZICACQNKZ-UHFFFAOYSA-N	undefined	No result	0
Pentadecanoic acid, TMS derivative	WQEPLUUGTLDZJY-UHFFFAOYSA-N	HMDB0000826	C16537	0
Pyrrole-2-carboxylic acid, 2TMS derivative	WRHZVMBBRYBTKZ-UHFFFAOYSA-N	HMDB0004230	C05942	0
3-Eicosene, (E)-	AKTLQTMAOYZJGI-FNORWQNLSA-N	undefined	No result	0
9-Octadecenamide, (Z)-	FATBGEAMYMYZAF-KTKRTIGZSA-N	HMDB0002117	C19670	0
Sarcosine, 2TMS derivative	FSYKKLYZXJSNPZ-UHFFFAOYSA-N	HMDB0000271	C00213	0
3-Indolepropionic acid, 2TMS derivative	GOLXRNDWAUTYKT-UHFFFAOYSA-N	HMDB0002302	No result	0
D-(+)-Cellobiose, octakis(trimethylsilyl) ether, methyloxime (isomer 2)	GUBGYTABKSRVRQ-QRZGKKJRSA-N	HMDB0000055	C06422	0
Isothiourea, 2-methyl-1-(2,4-dimethylphenyl)-3-(1,1-dimethyl-2-propynyl)-	GWPFOYXJPUAXPZ-UHFFFAOYSA-N	undefined	No result	0
1-Undecene, 8-methyl-	KUIGECHVOHJTNQ-UHFFFAOYSA-N	undefined	No result	0
Propanoic acid, 2-methyl-, anhydride	LSACYLWPPQLVSM-UHFFFAOYSA-N	HMDB0062788	No result	0
2-Pyrrolidone carboxylic acid, N-trimethylsilyl-, trimethylsilyl ester	ODHCTXKNWHHXJC-UHFFFAOYSA-N	HMDB0000267	C01879	0
2-Piperidinone, 1-(trimethylsilyl)-	XUWHAWMETYGRKB-UHFFFAOYSA-N	HMDB0011749	No result	0
4,4'-bi-4H-pyran, 2,2',6,6'-tetrakis(1,1-dimethylethyl)-4,4'-dimethyl-	ZPAXCAYDBOFMAU-UHFFFAOYSA-N	undefined	No result	0
Oleic Acid, (Z)-, TMS derivative	ZQPPMHVWECSIRJ-KTKRTIGZSA-N	HMDB0000207	C00712	0
9-Octadecenoic acid, (E)-, TMS derivative	ZQPPMHVWECSIRJ-MDZDMXLPSA-N	HMDB0000573	C01712	0
1-Heptadecene	ADOBXTDBFNCOBN-UHFFFAOYSA-N	undefined	No result	0
Dibutyl phthalate	DOIRQSBPFJWKBE-UHFFFAOYSA-N	HMDB0033244	C14214	0
Arsenous acid, tris(trimethylsilyl) ester	GCPXMJHSNVMWNM-UHFFFAOYSA-N	HMDB0015300	No result	0
Propanoic acid, 3,3'-thiobis-, didodecyl ester	GHKOFFNLGXMVNJ-UHFFFAOYSA-N	HMDB0040172	No result	0
Ethanolamine, 2TMS derivative	HZAXFHJVJLSVMW-UHFFFAOYSA-N	HMDB0000149	C00189	0
Hentriacontane	IUJAMGNYPWYUPM-UHFFFAOYSA-N	HMDB0030092	C08376	0
Sulfurous acid, 2-ethylhexyl undecyl ester	KUJVLRPOAZSAKP-UHFFFAOYSA-N	undefined	No result	0
1H-Purine-2,6,8(3H)-trione, 4,9-dihydro-1,3,4,9-tetrakis(trimethylsilyl)-	LEHOTFFKMJEONL-UHFFFAOYSA-N	HMDB0000289	C00366	0
l-Proline, N-allyloxycarbonyl-, decyl ester	OLJMBPQLESIYAK-UHFFFAOYSA-N	undefined	No result	0
Benzeneacetic acid, TMS derivative	WLJVXDMOQOGPHL-UHFFFAOYSA-N	HMDB0000209	C07086	0
d-Glucose, 2,3,4,5,6-pentakis-O-(trimethylsilyl)-, o-methyloxyme, (1E)-	WQZGKKKJIJFFOK-GASJEMHNSA-N	HMDB0000122	C00031	0
D-(+)-Talose, pentakis(trimethylsilyl) ether, methyloxime (syn)	WQZGKKKJIJFFOK-WHZQZERISA-N	undefined	C06467	0
L-Cysteine, 3TMS derivative	XUJNEKJLAYXESH-REOHCLBHSA-N	HMDB0000574	C00097	0
Benzoic acid, undecyl ester	YEHGKFOTJWYCBN-UHFFFAOYSA-N	undefined	No result	0
Sulfurous acid, cyclohexylmethyl octadecyl ester	ZTNKQBXOKMOFGL-UHFFFAOYSA-N	undefined	No result	0
L-Isoleucine, TMS derivative	AGPKZVBTJJNPAG-WHFBIAKZSA-N	HMDB0000172	C00407	0
Cyclopropane, 1-methyl-2-octyl-	BMCICASJEGCJIS-UHFFFAOYSA-N	undefined	No result	0
Naproxen, TMS derivative	CMWTZPSULFXXJA-VIFPVBQESA-N	HMDB0001923	C01517	0
a-Tocopherol, TMS derivative	GZIFEOYASATJEH-MHTDXHEMSA-N	HMDB0001893	C02477	0
Glyoxylic acid, di-TMS	HHLFWLYXYJOTON-UHFFFAOYSA-N	HMDB0000119	C00048	0
Hydrobenzoin, 2TMS derivative	IHPDTPWNFBQHEB-UHFFFAOYSA-N	HMDB0135186	No result	0
Eicosapentaenoic Acid, TMS derivative	JAZBEHYOTPTENJ-JLNKQSITSA-N	HMDB0001999	C06428	0
1-Heptene, 1,3-diphenyl-1-(trimethylsilyloxy)-	JBDVBSMPIPEWAM-FOCLMDBBSA-N	undefined	No result	0
1-Dodecanol	LQZZUXJYWNFBMV-UHFFFAOYSA-N	HMDB0011626	C02277	0
4-Methyl-2,4-bis(p-hydroxyphenyl)pent-1-ene, 2TMS derivative	MZLYLGGRVAFGBY-UHFFFAOYSA-N	undefined	C13625	0
L-Leucine, TMS derivative	ROHFNLRQFUQHCH-YFKPBYRVSA-N	HMDB0000687	C00123	0
dl-7-Azatryptophan	SNLOIIPRZGMRAB-UHFFFAOYSA-N	undefined	No result	0
D-Lyxose, 4TMS derivative	SRBFZHDQGSBBOR-AGQMPKSLSA-N	undefined	C00476	0
5,8,11-Eicosatrienoic acid, (Z)-, TMS derivative	UNSRRHDPHVZAHH-WYTUUNCASA-N	HMDB0010378	No result	0
4-Undecene, 7-methyl-	VELXNVLISHFDBR-CMDGGOBGSA-N	undefined	No result	0
Salicylic acid, 2TMS derivative	YGSDEFSMJLZEOE-UHFFFAOYSA-N	HMDB0001895	C00805	0
1,3-Dioxolane-2-methanol	ZAGUSKAXELYWCE-UHFFFAOYSA-N	undefined	No result	0
Bisphenol AF, bis(trimethylsilyl) ether	ZFVMWEVVKGLCIJ-UHFFFAOYSA-N	HMDB0249276	C14350	0
d Amino levulinic acid tri-TMS	ZGXJTSGNIOSYLO-UHFFFAOYSA-N	HMDB0001149	C00430	0
13-Docosenoic acid, methyl ester	ZYNDJIBBPLNPOW-ZHACJKMWSA-N	HMDB0002068	C08316	0
15-Tetracosenoic acid, methyl ester	AINIZSBLAFHZCP-ZHACJKMWSA-N	undefined	No result	0
D-(+)-Talofuranose, pentakis(trimethylsilyl) ether (isomer 2)	AVVWPBAENSWJCB-QTVWNMPRSA-N	undefined	No result	0
Dodecylcyclohexane	BLRBGKYYWDBAQQ-UHFFFAOYSA-N	undefined	No result	0
Petroselinic acid, TMS derivative	CNVZJPUDSLNTQU-UHFFFAOYSA-N	HMDB0002080	No result	0
DL-Phenylalanine, TMS derivative	COLNVLDHVKWLRT-QMMMGPOBSA-N	HMDB0000159	C00079	0
Benzimidazol-5-amine, 1-(4-ethoxyphenyl)-	DCVJVGBMIYAWNZ-UHFFFAOYSA-N	undefined	No result	0
Propylene glycol, 2TMS derivative	DNIAPMSPPWPWGF-UHFFFAOYSA-N	HMDB0001881	C00583	0
Ethane, 1,1,2-trimethoxy-	DYOZNCVZPFIXLU-UHFFFAOYSA-N	undefined	No result	0
Nitrous oxide	GQPLMRYTRLFLPF-UHFFFAOYSA-N	HMDB0035807	C00887	0
L-Lysine, N6,N6-bis(trimethylsilyl)-, trimethylsilyl ester	KDXKERNSBIXSRK-YFKPBYRVSA-N	HMDB0000182	C00047	0
1,2,4-Benzenetricarboxylic acid, 1,2-dimethyl ester	KUQGJFOIULVBKJ-UHFFFAOYSA-N	undefined	No result	0
L-Valine, TMS derivative	KZSNJWFQEVHDMF-BYPYZUCNSA-N	HMDB0000883	C00183	0
1-Decanol, 2-ethyl-	LTHQZRHTXDZWGX-UHFFFAOYSA-N	undefined	No result	0
Lycorenan, 9,10-dimethoxy-1-methyl-	LWBQJTCGYZXFLY-UHFFFAOYSA-N	undefined	No result	0
Octadecane, 3-ethyl-5-(2-ethylbutyl)-	MFLJAIATZVGFPM-UHFFFAOYSA-N	undefined	No result	0
2,6-Dimethyl-6-trifluoroacetoxyoctane	MQDOLKQRKBPOBK-UHFFFAOYSA-N	undefined	No result	0
L-Serine, 2TMS derivative	MTCFGRXMJLQNBG-REOHCLBHSA-N	HMDB0000187	C00065	0
Methylsulphonamide, N-ethyl-N-decyl-	OPBXZFNORSYREK-UHFFFAOYSA-N	undefined	No result	0
l-Norvaline, n-propargyloxycarbonyl-, pentyl ester	PLHUGWMUWPMAMS-UHFFFAOYSA-N	undefined	No result	0
1,3-Butanediol, 2TMS derivative	PUPZLCDOIYMWBV-UHFFFAOYSA-N	HMDB0031320	C20335	0
l-Leucine, N-methyl-N-(2-methoxyethoxycarbonyl)-, tetradecyl ester	ROHFNLRQFUQHCH-YFKPBYRVSA-N	HMDB0000687	C00123	0
3-Ethyl-3-methyl-2-pentanol	SLBLSROGXMXPPF-UHFFFAOYSA-N	undefined	No result	0
2,2-Dimethylpropane-1,3-diol, O,O'-bis(trimethylsilyl)-	SLCVBVWXLSEKPL-UHFFFAOYSA-N	undefined	No result	0
Etilefrine	SQVIAVUSQAWMKL-UHFFFAOYSA-N	HMDB0252100	D07931	0
Isonicotinic Acid, TMS derivative	TWBYWOBDOCUKOW-UHFFFAOYSA-N	HMDB0060665	C07446	0
Carbonic acid, 2-dimethylaminoethyl isobutyl ester	VIMOARYGXDOSDU-UHFFFAOYSA-N	undefined	No result	0
n-Heptadecylcyclohexane	VLHZQNGNJQYAIZ-UHFFFAOYSA-N	undefined	No result	0
Propanoic acid, 3-(methylthio)-, pentyl ester	VSCXQPTWKZWPQB-UHFFFAOYSA-N	undefined	No result	0
Dopamine, 4TMS derivative	VYFYYTLLBUKUHU-UHFFFAOYSA-N	HMDB0000073	C03758	0
Tripropylene glycol monomethyl ether, TMS derivative	WAEVWDZKMBQDEJ-UHFFFAOYSA-N	undefined	No result	0
Bisphenol A monomethyl ether, TMS derivative	WPVCFEULGFXPJD-UHFFFAOYSA-N	undefined	No result	0
d-Galactose, 2,3,4,5,6-pentakis-O-(trimethylsilyl)-, o-methyloxyme, (1Z)-	WQZGKKKJIJFFOK-SVZMEOIVSA-N	HMDB0000143	C00124	0
Supraene	YYGNTYWPHWGJRM-AAJYLUCBSA-N	HMDB0000256	C00751	0
1H-Indene-1,3(2H)-dione, 2-(9H-xanthene-9-yl)-	ZFIMNJFROFDYCI-UHFFFAOYSA-N	undefined	No result	0
Silicon tetrafluoride	ABTOQLMXBSRXSM-UHFFFAOYSA-N	undefined	No result	0
4-(Methylamino)butyric acid	AOKCDAVWJLOAHG-UHFFFAOYSA-N	HMDB0341354	C15987	0
Decane, 2,3,5-trimethyl-	AQDNBRMRIRTYIA-UHFFFAOYSA-N	undefined	No result	0
D-(+)-Talofuranose, pentakis(trimethylsilyl) ether (isomer 1)	AVVWPBAENSWJCB-QTVWNMPRSA-N	undefined	No result	0
Phosphinic acid, diphenyl-	BEQVQKJCLJBTKZ-UHFFFAOYSA-N	undefined	No result	0
3-(3-Methoxyphenyl)propionic acid, TMS derivative	BJJQJLOZWBZEGA-UHFFFAOYSA-N	HMDB0011751	No result	0
Bis(2-ethylhexyl) phthalate	BJQHLKABXJIVAM-UHFFFAOYSA-N	HMDB0249243	C03690	0
Acetamide, 2-(1-piperidyl)-N-(6-chloropyrazin-2-yl)-	BMHDUNVPJYZICG-UHFFFAOYSA-N	undefined	No result	0
Arachidonoyl amide	BNBSCAZCQDLUDU-DOFZRALJSA-N	undefined	No result	0
1-Hydroxycyclohexanecarboxylic acid, 2TMS derivative	BPOVRAAUERBWFK-UHFFFAOYSA-N	undefined	No result	0
1-Hexadecanol, TMS derivative	BXWNKGSJHAJOGX-UHFFFAOYSA-N	HMDB0003424	C00823	0
Sulfurous acid, di(cyclohexylmethyl) ester	CAGKNRVLKYAHDA-UHFFFAOYSA-N	undefined	No result	0
Veratric acid, TMS derivative	DAUAQNGYDSHRET-UHFFFAOYSA-N	HMDB0059763	No result	0
10-Nonadecanamine	DEKCSXCNXGALFT-UHFFFAOYSA-N	undefined	No result	0
5-Clorovaleric acid, 2-dimethylaminoethyl ester	DGGMOGREHWBVIZ-UHFFFAOYSA-N	undefined	No result	0
Carboxyibuprofen, bis(trimethylsilyl) ester	DIVLBIVDYADZPL-UHFFFAOYSA-N	HMDB0060564	No result	0
Uridine, 3TMS derivative	DRTQHJPVMGBUCF-XVFCMESISA-N	HMDB0000296	C00299	0
a-Linolenic acid, TMS derivative	DTOSIQBPPRVQHS-PDBXOOCHSA-N	HMDB0001388	C06427	0
Butanoic acid, 3,4-bis[(trimethylsilyl)oxy]-, trimethylsilyl ester	FERIUCNNQQJTOY-UHFFFAOYSA-N	HMDB0000039	C00246	0
Tartaric acid, 4TMS derivative	FEWJPZIEWOKRBE-UHFFFAOYSA-N	HMDB0062642	No result	0
Carbamazepine, TMS derivative	FFGPTBGBLSHEPO-UHFFFAOYSA-N	HMDB0014704	C06868	0
Phthalic acid, 3,5-dimethylphenyl 4-methoxyphenyl ester	FHNYOYVIURBCRT-UHFFFAOYSA-N	undefined	No result	0
2-Undecene, 8-methyl-, (Z)-	FJAKGGBFGKZQMX-XQRVVYSFSA-N	undefined	No result	0
1-Deoxypentitol, 4TMS derivative	FJGNTEKSQVNVTJ-UHFFFAOYSA-N	HMDB0041486	No result	0
Dodecane, 2,6,11-trimethyl-	FONXOARHSFUBAN-UHFFFAOYSA-N	undefined	No result	0
Phthalic acid, 6-ethyl-3-octyl butyl ester	FVSVXZMWAPCCBT-UHFFFAOYSA-N	undefined	No result	0
Heneicosylcyclohexane	FXKJJAAVRNCTIT-UHFFFAOYSA-N	undefined	No result	0
N-Ethyl-2-isopropoxycarbonylazetidine	GJVPINVUWSHSCO-UHFFFAOYSA-N	undefined	No result	0
Ibuprofen, TMS derivative	HEFNNWSXXWATRW-UHFFFAOYSA-N	HMDB0001925	C01588	0
2-Pyrrolidinone, TMS derivative	HNJBEVLQSNELDL-UHFFFAOYSA-N	HMDB0002039	No result	0
Benzenamine, 2,4,6-trinitro-	IAHOUQOWMXVMEH-UHFFFAOYSA-N	undefined	No result	0
11-Tridecenyl propionate	IDWXZBIFCKIBCU-HWKANZROSA-N	undefined	No result	0
Bisphenol A, 2TMS derivative	IISBACLAFKSPIT-UHFFFAOYSA-N	HMDB0032133	C13624	0
Eicosane	IIYFAKIEWZDVMP-UHFFFAOYSA-N	HMDB0059909	C13834	0
Uracil, 2TMS derivative	ISAKRJDGNUQOIC-UHFFFAOYSA-N	HMDB0000300	C00106	0
Eicosane, 9-octyl-	JNRMADFNKDCLKT-UHFFFAOYSA-N	undefined	No result	0
Oxalic acid, butyl isohexyl ester	JYPCLOIOJBKFQA-UHFFFAOYSA-N	undefined	No result	0
Phenoxyacetic acid, TMS derivative	LCPDWSOZIOUXRV-UHFFFAOYSA-N	HMDB0031609	C02181	0
1,1-Dimethylethanol, TMS derivative	LESXFEZIFXFIQR-UHFFFAOYSA-N	HMDB0028929	No result	0
L-2-Aminobutyric acid, N-dimethylaminomethylene-, butyl ester	LJNUSTICJXXZEL-UHFFFAOYSA-N	undefined	No result	0
D-(-)-Tagatose, pentakis(trimethylsilyl) ether, methyloxime (syn)	LKDRXBCSQODPBY-VRPWFDPXSA-N	HMDB0000660	C02336	0
Pyrrole, 2-methyl-5-phenyl-	LOLZVJJIBIGCFD-UHFFFAOYSA-N	undefined	No result	0
(R*,S*)-2,3-Dihydroxybutanoic acid, tris(trimethylsilyl) deriv.	LOUGYXZSURQALL-UHFFFAOYSA-N	undefined	No result	0
Nonadecane	LQERIDTXQFOHKA-UHFFFAOYSA-N	HMDB0034289	No result	0
5-Cyano-2-methyl-4-methylthio-6-phenylpyrimidine	LQKXUVVCCVFVLX-UHFFFAOYSA-N	undefined	No result	0
Benzene, 2-methoxy-1-(2-nitroethenyl)-3-(phenylmethoxy)-	LRJYBEQHFCPDCZ-ZHACJKMWSA-N	undefined	No result	0
Propanoic acid, 3,3'-thiobis-, ditetradecyl ester	LVEOKSIILWWVEO-UHFFFAOYSA-N	undefined	No result	0
Carphedon, N-(trimethylsilyl)	LYONXVJRBWWGQO-UHFFFAOYSA-N	undefined	No result	0
Pentyl tetratriacontyl ether	MAFHZOCDFOXXQN-UHFFFAOYSA-N	undefined	No result	0
Phosphoramidous difluoride	MAZAVXNOOKBYCU-UHFFFAOYSA-N	undefined	No result	0
Nonane, 2,6-dimethyl-	MGNGOEWESNDQAN-UHFFFAOYSA-N	undefined	No result	0
3,5-Diacetyl-4-methyl-1-phenyl-1,4-dihydropyridine	MJVYLRRHOAIQNM-UHFFFAOYSA-N	undefined	No result	0
Pyridine, 1,2-dihydro-1-phenyl-	MOKUQYSJYISPJS-UHFFFAOYSA-N	undefined	No result	0
Anthracene, 1,2,3,4-tetrahydro-9,10-dimethyl-	MWPLVEDNUUSJAV-UHFFFAOYSA-N	undefined	C14315	0
1-Nonene, 4,6,8-trimethyl-	MYYALSDXVMCKSR-UHFFFAOYSA-N	HMDB0062786	No result	0
Propanedioic acid, 2TMS derivative	OFOBLEOULBTSOW-UHFFFAOYSA-N	HMDB0000691	C00383	0
o-Terphenyl	OIAQMFOKAXHPNH-UHFFFAOYSA-N	undefined	No result	0
Decane, 2,4-dimethyl-	OJAFXEXESSNPMH-UHFFFAOYSA-N	undefined	No result	0
Ethanol, pentamethyl-	OKXVARYIKDXAEO-UHFFFAOYSA-N	undefined	No result	0
Tyrosine, 2TMS derivative	OUYCCCASQSFEME-QMMMGPOBSA-N	HMDB0000158	C00082	0
2,3-Butanediol, 2TMS derivative	OWBTYPJTUOEWEK-UHFFFAOYSA-N	HMDB0003156	No result	0
Cyclohexanamine, TMS derivative	PAFZNILMFXTMIY-UHFFFAOYSA-N	HMDB0031404	C00571	0
Sebacic acid, 4-phenylphenyl undecyl ester	PFGJRGSPGNQHBK-UHFFFAOYSA-N	undefined	No result	0
l-Norvaline, N-(2-methoxyethoxycarbonyl)-, undecyl ester	PGTMBLYETHSUKL-UHFFFAOYSA-N	undefined	No result	0
Hippuric acid, 2TMS derivative	QIAFMBKCNZACKA-UHFFFAOYSA-N	HMDB0000714	C01586	0
13-Octadecenal, (Z)-	QIRGIHPYVVKWTO-WAYWQWQTSA-N	undefined	No result	0
Tryptophan, 4TMS derivative	QIVBCDIJIAJPQS-VIFPVBQESA-N	HMDB0000929	C00078	0
3-Hexadecene, (Z)-	QIZDLUWRENVVJW-ALCCZGGFSA-N	undefined	No result	0
2-Isopropyl-5-methyl-1-heptanol	QKPITXQYXIOHTB-UHFFFAOYSA-N	undefined	No result	0
Cyclobutanecarboxylic acid, 2-dimethylaminoethyl ester	QRKFLEOUOIDJAY-UHFFFAOYSA-N	undefined	No result	0
Paraxanthine, N-trimethylsilyl-	QUNWUDVFRNGTCO-UHFFFAOYSA-N	HMDB0001860	C13747	0
Cyclopropanepentanoic acid, 2-undecyl-, methyl ester, trans-	RBKVUWMZDIQOTG-OALUTQOASA-N	undefined	No result	0
5-Hydroxypipecolic acid, 3TMS derivative	RKEYKDXXZCICFZ-UHFFFAOYSA-N	HMDB0029426	No result	0
Paracetamol, 2TMS derivative	RZVAJINKPMORJF-UHFFFAOYSA-N	HMDB0001859	C06804	0
Paracetamol, TMS derivative	RZVAJINKPMORJF-UHFFFAOYSA-N	HMDB0001859	C06804	0
D-Fucitol, 5TMS derivative	SKCKOFZKJLZSFA-KCDKBNATSA-N	HMDB0304954	No result	0
Dodecane	SNRUBQQJIBEYMU-UHFFFAOYSA-N	HMDB0031444	C08374	0
Phthalic acid, di(2-fluorophenyl) ester	SQFGLCBXLDLODM-UHFFFAOYSA-N	undefined	No result	0
Spiropentane, butyl-	TYYFRIFTXPYWNJ-UHFFFAOYSA-N	undefined	No result	0
Ethanone, 1-(1-methylcyclohexyl)-	UBMBCDFRVPGSSQ-UHFFFAOYSA-N	undefined	No result	0
1,2,3-Butanetrione, 1-phenyl-, 2,3-dioxime	UFIJWQKLMBHNLN-UHFFFAOYSA-N	undefined	No result	0
meso-Erythritol, 4TMS derivative	UNXHWFMMPAWVPI-ZXZARUISSA-N	HMDB0002994	C00503	0
Decane, 6-ethyl-2-methyl-	URCFDWVAWCRKTQ-UHFFFAOYSA-N	undefined	No result	0
Sulfurous acid, nonyl 2-propyl ester	VNJPNCNTXDKLLQ-UHFFFAOYSA-N	undefined	No result	0
2-Methoxy-1,3-dioxolane	VRAYTNFBRROPJU-UHFFFAOYSA-N	undefined	No result	0
Etidocaine	VTUSIVBDOCDNHS-UHFFFAOYSA-N	undefined	C07530	0
1-Phenylethanol, TMS derivative	WAPNOHKVXSQRPX-UHFFFAOYSA-N	HMDB0032619	C07112	0
Oxalic acid, cyclobutyl octadecyl ester	XBDFFXWKUQOUQH-UHFFFAOYSA-N	undefined	No result	0
Phthalimide, TMS derivative	XKJCHHZQLQNZHY-UHFFFAOYSA-N	HMDB0256502	No result	0
Cysteine, 3TMS derivative	XUJNEKJLAYXESH-REOHCLBHSA-N	HMDB0000574	C00097	0
Terbutaline, N-trifluoroacetyl-O,O,o-tris(trimethylsilyl)deriv.	XWTYSIMOBUGWOL-UHFFFAOYSA-N	HMDB0015009	C07129	0
1,2,3-Butanetriol, 3TMS derivative	YAXKTBLXMTYWDQ-UHFFFAOYSA-N	HMDB0034778	No result	0
Nonane, 3,7-dimethyl-	YGPVLXJHRFZYJJ-UHFFFAOYSA-N	undefined	No result	0
Diethanolamine, 3TMS derivative	ZBCBWPMODOFKDW-UHFFFAOYSA-N	HMDB0004437	C06772	0
Alanine, N-methyl-N-(2-methoxyethoxycarbonyl)-, dodecyl ester	ZBDBAZCCVHXJEU-UHFFFAOYSA-N	undefined	No result	0
n-Pentadecylcyclohexane	ZNUABQHWFGTOCO-UHFFFAOYSA-N	undefined	No result	0
