# Supplementary material for: Multiomics Picture of Obesity in Young Adults
Source: Biology (Basel). 2024 Apr 18;13(4):272. doi: 10.3390/biology13040272 (PMC11048234; doi:10.3390/biology13040272)
Supplement: Supplementary file 1 [file biology-13-00272-s001.zip › Table S6.xlsx]

## Sheet: Лист1
Results of the overrepresentation analysis for metabolites
ID	Description	GeneRatio	BgRatio	pvalue	p.adjust	qvalue	geneID	Count
Ammonia Recycling	Ammonia Recycling	8/39	31/1021	8.99945e-06	0.000521968	0.000435763	HMDB0000123/HMDB0000641/HMDB0000191/HMDB0000168/HMDB0000187/HMDB0000177/HMDB0000148/HMDB0000243	8
Urea Cycle	Urea Cycle	7/39	28/1021	4.48872e-05	0.00130173	0.00108674	HMDB0000214/HMDB0000641/HMDB0000161/HMDB0000191/HMDB0000294/HMDB0000148/HMDB0000243	7
Glucose-Alanine Cycle	Glucose-Alanine Cycle	4/39	11/1021	0.000496072	0.00959073	0.00800678	HMDB0000161/HMDB0000148/HMDB0000243/HMDB0000122	4
Alanine Metabolism	Alanine Metabolism	4/39	17/1021	0.00302796	0.0439054	0.0366542	HMDB0000123/HMDB0000161/HMDB0000148/HMDB0000243	4
Glycine and Serine Metabolism	Glycine and Serine Metabolism	7/39	56/1021	0.00397404	0.0460988	0.0384854	HMDB0000123/HMDB0000161/HMDB0000187/HMDB0000148/HMDB0000696/HMDB0000139/HMDB0000243	7
Aspartate Metabolism	Aspartate Metabolism	5/39	34/1021	0.00770932	0.0715715	0.0597511	HMDB0000641/HMDB0000191/HMDB0000168/HMDB0000148/HMDB0000042	5
Glutamate Metabolism	Glutamate Metabolism	6/39	50/1021	0.00959273	0.0715715	0.0597511	HMDB0000123/HMDB0000641/HMDB0000161/HMDB0000191/HMDB0000148/HMDB0000243	6
Galactose Metabolism	Galactose Metabolism	5/39	36/1021	0.00987193	0.0715715	0.0597511	HMDB0000131/HMDB0000211/HMDB0000169/HMDB0000143/HMDB0000122	5
Arginine and Proline Metabolism	Arginine and Proline Metabolism	6/39	53/1021	0.0127249	0.0820048	0.0684614	HMDB0000214/HMDB0000123/HMDB0000162/HMDB0000191/HMDB0000294/HMDB0000148	6
Warburg Effect	Warburg Effect	6/39	60/1021	0.0227386	0.131884	0.110103	HMDB0000094/HMDB0000641/HMDB0000190/HMDB0000148/HMDB0000243/HMDB0000122	6
Amino Sugar Metabolism	Amino Sugar Metabolism	4/39	32/1021	0.0302196	0.15934	0.133024	HMDB0000641/HMDB0000148/HMDB0000243/HMDB0000042	4
Transfer of Acetyl Groups into Mitochondria	Transfer of Acetyl Groups into Mitochondria	3/39	22/1021	0.0480017	0.232008	0.193691	HMDB0000094/HMDB0000243/HMDB0000122	3
Malate-Aspartate Shuttle	Malate-Aspartate Shuttle	2/39	10/1021	0.0527264	0.235241	0.19639	HMDB0000191/HMDB0000148	2
Glutathione Metabolism	Glutathione Metabolism	3/39	25/1021	0.0662665	0.274533	0.229192	HMDB0000267/HMDB0000123/HMDB0000148	3
Phenylalanine and Tyrosine Metabolism	Phenylalanine and Tyrosine Metabolism	3/39	28/1021	0.0872751	0.337464	0.28173	HMDB0000158/HMDB0000159/HMDB0000148	3
beta-Alanine Metabolism	beta-Alanine Metabolism	3/39	34/1021	0.136449	0.429786	0.358805	HMDB0000191/HMDB0000177/HMDB0000148	3
Fatty Acid Biosynthesis	Fatty Acid Biosynthesis	3/39	35/1021	0.145443	0.429786	0.358805	HMDB0000511/HMDB0000691/HMDB0000042	3
Gluconeogenesis	Gluconeogenesis	3/39	35/1021	0.145443	0.429786	0.358805	HMDB0000190/HMDB0000243/HMDB0000122	3
Alpha Linolenic Acid and Linoleic Acid Metabolism	Alpha Linolenic Acid and Linoleic Acid Metabolism	2/39	18/1021	0.148202	0.429786	0.358805	HMDB0001043/HMDB0002183	2
Spermidine and Spermine Biosynthesis	Spermidine and Spermine Biosynthesis	2/39	18/1021	0.148202	0.429786	0.358805	HMDB0000214/HMDB0000696	2
Carnitine Synthesis	Carnitine Synthesis	2/39	20/1021	0.175608	0.481895	0.402308	HMDB0000123/HMDB0000182	2
Valine, Leucine, and Isoleucine Degradation	Valine, Leucine, and Isoleucine Degradation	4/39	60/1021	0.19139	0.481895	0.402308	HMDB0000172/HMDB0000687/HMDB0000883/HMDB0000148	4
Sphingolipid Metabolism	Sphingolipid Metabolism	3/39	40/1021	0.193126	0.481895	0.402308	HMDB0000187/HMDB0000143/HMDB0000122	3
Tryptophan Metabolism	Tryptophan Metabolism	4/39	61/1021	0.199405	0.481895	0.402308	HMDB0000929/HMDB0000161/HMDB0000148/HMDB0000197	4
Propanoate Metabolism	Propanoate Metabolism	3/39	42/1021	0.213247	0.494733	0.413026	HMDB0000883/HMDB0000148/HMDB0000237	3
Methionine Metabolism	Methionine Metabolism	3/39	43/1021	0.223487	0.498547	0.41621	HMDB0000123/HMDB0000187/HMDB0000696	3
Glycerolipid Metabolism	Glycerolipid Metabolism	2/39	25/1021	0.246891	0.511417	0.426954	HMDB0000131/HMDB0000139	2
Glycolysis	Glycolysis	2/39	25/1021	0.246891	0.511417	0.426954	HMDB0000243/HMDB0000122	2
Cysteine Metabolism	Cysteine Metabolism	2/39	26/1021	0.261384	0.513063	0.428329	HMDB0000148/HMDB0000243	2
Pyruvate Metabolism	Pyruvate Metabolism	3/39	47/1021	0.265378	0.513063	0.428329	HMDB0000190/HMDB0000243/HMDB0000042	3
Lysine Degradation	Lysine Degradation	2/39	27/1021	0.275896	0.516193	0.430941	HMDB0000182/HMDB0000148	2
Selenoamino Acid Metabolism	Selenoamino Acid Metabolism	2/39	28/1021	0.290405	0.52636	0.439429	HMDB0000161/HMDB0000187	2
Purine Metabolism	Purine Metabolism	4/39	74/1021	0.31126	0.547063	0.456714	HMDB0000123/HMDB0000641/HMDB0000191/HMDB0000148	4
D-Arginine and D-Ornithine Metabolism	D-Arginine and D-Ornithine Metabolism	1/39	11/1021	0.349859	0.593567	0.495537	HMDB0000294	1
Citric Acid Cycle	Citric Acid Cycle	2/39	33/1021	0.362244	0.593567	0.495537	HMDB0000094/HMDB0000243	2
Phosphatidylethanolamine Biosynthesis	Phosphatidylethanolamine Biosynthesis	1/39	12/1021	0.374963	0.593567	0.495537	HMDB0000187	1
Ketone Body Metabolism	Ketone Body Metabolism	1/39	13/1021	0.399122	0.593567	0.495537	HMDB0000011	1
Thyroid Hormone Synthesis	Thyroid Hormone Synthesis	1/39	13/1021	0.399122	0.593567	0.495537	HMDB0000158	1
Vitamin K Metabolism	Vitamin K Metabolism	1/39	13/1021	0.399122	0.593567	0.495537	HMDB0000237	1
Nicotinate and Nicotinamide Metabolism	Nicotinate and Nicotinamide Metabolism	2/39	38/1021	0.43152	0.625704	0.522366	HMDB0000641/HMDB0000148	2
Tyrosine Metabolism	Tyrosine Metabolism	3/39	67/1021	0.478618	0.65797	0.549303	HMDB0000158/HMDB0000191/HMDB0000148	3
Histidine Metabolism	Histidine Metabolism	2/39	42/1021	0.484174	0.65797	0.549303	HMDB0000177/HMDB0000148	2
Catecholamine Biosynthesis	Catecholamine Biosynthesis	1/39	18/1021	0.506908	0.65797	0.549303	HMDB0000158	1
Ethanol Degradation	Ethanol Degradation	1/39	18/1021	0.506908	0.65797	0.549303	HMDB0000042	1
Phosphatidylinositol Phosphate Metabolism	Phosphatidylinositol Phosphate Metabolism	1/39	19/1021	0.526081	0.65797	0.549303	HMDB0000211	1
Threonine and 2-Oxobutanoate Degradation	Threonine and 2-Oxobutanoate Degradation	1/39	19/1021	0.526081	0.65797	0.549303	HMDB0000167	1
Lactose Synthesis	Lactose Synthesis	1/39	20/1021	0.544527	0.65797	0.549303	HMDB0000122	1
Nucleotide Sugars Metabolism	Nucleotide Sugars Metabolism	1/39	20/1021	0.544527	0.65797	0.549303	HMDB0000143	1
Betaine Metabolism	Betaine Metabolism	1/39	23/1021	0.595766	0.705192	0.588727	HMDB0000696	1
Caffeine Metabolism	Caffeine Metabolism	1/39	25/1021	0.626757	0.712783	0.595064	HMDB0001847	1
Inositol Phosphate Metabolism	Inositol Phosphate Metabolism	1/39	25/1021	0.626757	0.712783	0.595064	HMDB0000211	1
Folate Metabolism	Folate Metabolism	1/39	29/1021	0.68195	0.760637	0.635014	HMDB0000148	1
Fructose and Mannose Degradation	Fructose and Mannose Degradation	1/39	32/1021	0.718042	0.785782	0.656006	HMDB0000169	1
Inositol Metabolism	Inositol Metabolism	1/39	34/1021	0.739851	0.794655	0.663415	HMDB0000211	1
Arachidonic Acid Metabolism	Arachidonic Acid Metabolism	2/39	71/1021	0.770386	0.812407	0.678235	HMDB0001043/HMDB0000148	2
Porphyrin Metabolism	Porphyrin Metabolism	1/39	40/1021	0.795875	0.824299	0.688163	HMDB0000123	1
Pyrimidine Metabolism	Pyrimidine Metabolism	1/39	59/1021	0.906249	0.922148	0.769851	HMDB0000641	1
Bile Acid Biosynthesis	Bile Acid Biosynthesis	1/39	64/1021	0.923806	0.923806	0.771236	HMDB0000123	1
